# Supplementary material for: Effects of short birth interval on neonatal, infant and under-five child mortality in Ethiopia: a nationally representative observational study using inverse probability of treatment weighting
Source: PubMed Central journal article supplement — BMJ Open. 2021 Aug 18;11(8):e047892. doi: 10.1136/bmjopen-2020-047892 (PMC8375759; doi:10.1136/bmjopen-2020-047892), 2021-08-18
Supplement: bmjopen-2020-047892.draft_revisions.pdf [file bmjopen-2020-047892.draft_revisions.pdf]

# BMJ Open

BMJ Open is committed to open peer review. As part of this commitment we make the peer review history of every article we publish publicly available.

When an article is published we post the peer reviewers' comments and the authors' responses online. We also post the versions of the paper that were used during peer review. These are the versions that the peer review comments apply to.

The versions of the paper that follow are the versions that were submitted during the peer review process. They are not the versions of record or the final published versions. They should not be cited or distributed as the published version of this manuscript.

BMJ Open is an open access journal and the full, final, typeset and author-corrected version of record of the manuscript is available on our site with no access controls, subscription charges or pay-per-view fees (<http://bmjopen.bmj.com>).

If you have any questions on BMJ Open's open peer review process please email [info.bmjopen@bmj.com](mailto:info.bmjopen@bmj.com)

# BMJ Open

## The effects of short birth interval on neonatal, infant and under-five child mortality in Ethiopia

|                               |                                                                                                                                                                                                                                                                                                                                                                                                                |
|-------------------------------|----------------------------------------------------------------------------------------------------------------------------------------------------------------------------------------------------------------------------------------------------------------------------------------------------------------------------------------------------------------------------------------------------------------|
| Journal:                      | <i>BMJ Open</i>                                                                                                                                                                                                                                                                                                                                                                                                |
| Manuscript ID                 | bmjopen-2020-047892                                                                                                                                                                                                                                                                                                                                                                                            |
| Article Type:                 | Original research                                                                                                                                                                                                                                                                                                                                                                                              |
| Date Submitted by the Author: | 11-Dec-2020                                                                                                                                                                                                                                                                                                                                                                                                    |
| Complete List of Authors:     | Shifti, Desalegn Markos; Saint Paul's Hospital Millennium Medical College; The University of Newcastle Faculty of Health and Medicine, School of Medicine<br>Chojenta, Catherine; The University of Newcastle Faculty of Health and Medicine<br>Holliday, Elizabeth; The University of Newcastle Faculty of Health and Medicine<br>Loxton, Deborah; The University of Newcastle Faculty of Health and Medicine |
| Keywords:                     | PUBLIC HEALTH, EPIDEMIOLOGY, Maternal medicine < OBSTETRICS, Community child health < PAEDIATRICS                                                                                                                                                                                                                                                                                                              |
|                               |                                                                                                                                                                                                                                                                                                                                                                                                                |

SCHOLARONE™  
Manuscripts

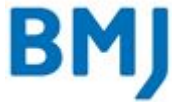

I, the Submitting Author has the right to grant and does grant on behalf of all authors of the Work (as defined in the below author licence), an exclusive licence and/or a non-exclusive licence for contributions from authors who are: i) UK Crown employees; ii) where BMJ has agreed a CC-BY licence shall apply, and/or iii) in accordance with the terms applicable for US Federal Government officers or employees acting as part of their official duties; on a worldwide, perpetual, irrevocable, royalty-free basis to BMJ Publishing Group Ltd ("BMJ") its licensees and where the relevant Journal is co-owned by BMJ to the co-owners of the Journal, to publish the Work in this journal and any other BMJ products and to exploit all rights, as set out in our [licence](#).

The Submitting Author accepts and understands that any supply made under these terms is made by BMJ to the Submitting Author unless you are acting as an employee on behalf of your employer or a postgraduate student of an affiliated institution which is paying any applicable article publishing charge ("APC") for Open Access articles. Where the Submitting Author wishes to make the Work available on an Open Access basis (and intends to pay the relevant APC), the terms of reuse of such Open Access shall be governed by a Creative Commons licence – details of these licences and which [Creative Commons](#) licence will apply to this Work are set out in our licence referred to above.

Other than as permitted in any relevant BMJ Author's Self Archiving Policies, I confirm this Work has not been accepted for publication elsewhere, is not being considered for publication elsewhere and does not duplicate material already published. I confirm all authors consent to publication of this Work and authorise the granting of this licence.

1  
2  
3  
4 1 **The effects of short birth interval on neonatal, infant and**  
5  
6  
7 2 **under-five child mortality in Ethiopia**  
8  
9

10  
11 3 Desalegn Markos Shifti<sup>1,2,\*</sup>, Catherine Chojenta<sup>2</sup>, Elizabeth G. Holliday<sup>3</sup>, Deborah Loxton<sup>2</sup>  
12

13  
14 4 **Affiliation**  
15

16  
17 5 <sup>1</sup>Saint Paul's Hospital Millennium Medical College, Addis Ababa, Ethiopia  
18

19  
20 6 <sup>2</sup>Priority Research Centre for Generational Health and Ageing, School of Medicine and  
21  
22 7 Public Health, University of Newcastle, New South Wales, Australia  
23  
24

25  
26 8 <sup>3</sup>Centre for Clinical Epidemiology and Biostatistics, School of Medicine and Public Health,  
27  
28 9 University of Newcastle, New South Wales, Australia  
29

30  
31  
32  
33  
34 10  
35 11 \*Corresponding author

36  
37 12 [desalegnmarkos@gmail.com](mailto:desalegnmarkos@gmail.com), [desalegnmarkos.shifti@uon.edu.au](mailto:desalegnmarkos.shifti@uon.edu.au)  
38  
39  
40  
41  
42  
43  
44  
45  
46  
47  
48  
49  
50  
51  
52  
53  
54  
55  
56  
57  
58  
59  
60

## 15 Abstract

16 **Objective** To assess the effect of short birth interval on neonatal, infant, and under-five  
17 mortality in Ethiopia.

18 **Design** A nationally representative cross-sectional survey.

19 **Setting** This study used data from the Ethiopia Demographic and Health Survey (EDHS) 2016.

20 **Participants** A total of 8,448 women who had at least two live births during the five years  
21 preceding the survey were included in the analysis.

22 **Outcome measures** Neonatal mortality (death of the child within 28 days of birth), infant  
23 mortality (death between birth and 11 months), and under-five mortality (death between birth  
24 and 59 months) were the outcome variables.

25 **Methods** Weighted logistic regression analysis based on inverse probability of treatment  
26 weights (IPTW) was used to estimate exposure effects adjusted for potential confounders.

27 **Results** The adjusted odds of neonatal mortality were about 50% higher among women with  
28 short birth interval (AOR=1.53, 95% CI= 1.13, 2.09) than those without. The odds of infant  
29 mortality were nearly two-fold higher (AOR=1.94, 95% CI= 1.39, 2.70) among women with  
30 short birth interval. The odds of under-five child mortality were also about two-fold higher  
31 (AOR=2.02, 95% CI= 1.48, 2.74) higher among women with short birth interval.

32 **Conclusion** Short birth interval has a significant effect on neonatal, infant, and under-five  
33 mortality in Ethiopia. Interventions targeting short birth interval are warranted to reduce  
34 neonatal, infant, and under-five mortality.

## 36 Introduction

37 Short birth interval, defined as a birth-to-birth interval of less than 33 months,<sup>1</sup> is a key public  
38 health problem with an estimated prevalence of 45.8% in Ethiopia.<sup>2</sup> Previous studies<sup>2-4</sup> have  
39 revealed the multifactorial nature of short birth interval, its spatial variation, and  
40 socioeconomic inequality in Ethiopia. Only about one-third of women in Ethiopia use modern  
41 contraceptives, which can prevent short birth interval.<sup>5</sup> Literature has also shown the effects of  
42 short birth interval may include, but are not limited to, preterm birth,<sup>6 7</sup> low birth weight,<sup>6 7</sup>  
43 small size for gestational age,<sup>6</sup> congenital anomalies,<sup>8 9</sup> autism,<sup>10</sup> miscarriage, preeclampsia,  
44 and premature rupture of membranes.<sup>11 12</sup>

45 Neonatal, infant, and under-five mortality are defined as the death of a child within 28 days of  
46 birth, before the age of 1 year, and before five years, respectively.<sup>5</sup> These mortality outcomes  
47 are regarded as a highly sensitive (proxy) measure of population health, a country's poverty  
48 and socioeconomic development status, and the availability and quality of health services and  
49 medical technology.<sup>13 14</sup>

50 The Sustainable Development Goal (SDG) 3.2 states that all countries should aim to reduce  
51 the neonatal mortality rate (NMR) to 12 deaths per 1000 live births or fewer, and reduce under-  
52 five mortality to 25 deaths per 1000 live births or fewer, by 2030.<sup>15</sup> The Growth and  
53 Transformation Plan of Ethiopia (GTPE) II also targets reductions in neonatal, infant, and  
54 under-five mortality rates, from 28 per 1000 live births, 44 per 1000 live births, and 64 per  
55 1000 live births in 2014/15 to 10, 20, and 30 per 1000 live births by 2019/20, respectively.<sup>16</sup>  
56 However, the 2016 Ethiopia Demographic and Health Survey (EDHS) report revealed that the  
57 neonatal, infant, and under-five mortality rates in Ethiopia were 29, 48, and 67 deaths per 1,000  
58 live births, respectively: still much higher than GTPE targets.<sup>5 16</sup>

1  
2  
3 59 Literature from Ethiopia has shown that neonatal, infant, and under-five mortality are  
4  
5 60 associated with maternal education,<sup>17 18</sup> lack of antenatal care,<sup>19</sup> home delivery,<sup>20</sup> preterm  
6  
7 61 birth,<sup>19 21</sup> low birth weight,<sup>20 21</sup> multiple births,<sup>17 19 22 23</sup> sex of the child,<sup>17 19 22-25</sup> wealth status,<sup>26</sup>  
8  
9 62 <sup>27</sup> place of residence,<sup>20 23 24</sup> source of drinking water,<sup>27</sup> and lack of access to improved toilet  
10  
11 63 facility.<sup>28</sup>  
12  
13  
14

15 64 Although previous studies<sup>17-19 23 24 27-31</sup> have suggested birth interval as one factor influencing  
16  
17 65 neonatal, infant, under-five mortality, these studies have several limitations. A key limitation  
18  
19 66 is that these studies<sup>17-19 23 24 27-31</sup> did not use the World Health Organization (WHO)  
20  
21 67 recommended<sup>1</sup> definition of short birth interval. Understanding the impact of short birth  
22  
23 68 interval on neonatal, infant, and under-five mortality, using the WHO definition,<sup>1</sup> is necessary  
24  
25 69 for the formulation of valid, consistent policies and health planning strategies and interventions  
26  
27 70 to improve child health outcomes. Second, women who were not eligible to provide birth  
28  
29 71 interval information (i.e., those who had given birth only once) were included in the analysis  
30  
31 72 of some studies.<sup>19 24 28</sup> This may result in underestimation or obscuration of the true effect of  
32  
33 73 birth interval on child mortality. Third, even among studies using the same definition of short  
34  
35 74 birth interval, findings have been inconsistent.<sup>19 24</sup> One of the studies using national data<sup>19</sup> did  
36  
37 75 not control for a range of potential confounders including maternal education, wealth status,  
38  
39 76 number of children, and region of residence, even though these data were available in the  
40  
41 77 datasets used for analysis. In addition, various studies did not consider short birth interval as a  
42  
43 78 potential predictor of neonatal,<sup>21 25 26 32-35</sup> infant,<sup>18 36 37</sup> and under-five mortality<sup>38-41</sup> in their  
44  
45 79 studies.  
46  
47  
48  
49  
50  
51  
52

53 80 Generally, the effect of short birth interval, as per the most recent WHO recommendation,<sup>1</sup> on  
54  
55 81 neonatal, infant, and under-five mortality has not been investigated in Ethiopia. Evidence  
56  
57 82 regarding the effect of short birth interval is required for informed decision making by policy  
58  
59  
60

1  
2  
3 83 makers and health program planners. This paper aimed to assess the effect of short birth interval  
4  
5 84 on neonatal, infant, and under-five mortality using the most recent WHO definition and  
6  
7  
8 85 adjusting for a comprehensive set of potential confounders.  
9

## 10 86 **Methods**

### 11 12 13 87 **Study design**

14  
15  
16 88 This analysis used data from the Ethiopia Demographic and Health Survey (EDHS) 2016. The  
17  
18 89 EDHS is a nationally representative cross-sectional study conducted in nine geographical  
19  
20 90 regions (Tigray, Afar, Amhara, Oromia, Somali, Benishangul-Gumuz, Southern Nations  
21  
22 91 Nationalities and Peoples (SNNP), Gambela, and Harari) and two administrative cities (Addis  
23  
24 92 Ababa and Dire Dawa). A two-stage, stratified, clustered random sampling design was  
25  
26 93 employed to collect data from women who gave birth within the five years preceding the  
27  
28 94 survey. Further descriptions of the sampling procedure for the EDHS are presented elsewhere.<sup>5</sup>  
29  
30 95 A total of 8,448 women who had at least two live births during the five years preceding the  
31  
32 96 2016 survey were included in the analysis. When women had more than two births in the five  
33  
34 97 years preceding the survey, the birth interval between the most recent index child and the  
35  
36 98 immediately preceding child was considered for all the study participants.  
37  
38  
39

### 40 41 99 **Variables**

#### 42 43 44 100 **Outcome variables**

45  
46 101 The outcome variables in the current study were neonatal mortality (death of the child within  
47  
48 102 28 days of birth), infant mortality (death between birth and 11 months), and under-five  
49  
50 103 mortality (death between birth and 59 months).<sup>5 42</sup> These outcomes were coded as binary  
51  
52 104 variables (1/0).  
53

#### 54 55 56 105 **Treatment/exposure variable** 57 58 59 60



1  
2  
3 106 Short birth interval was the treatment variable and was defined as a birth-to-birth interval of  
4  
5 107 less than 33 months as per the WHO definition.<sup>1</sup> Women's birth interval data were collected  
6  
7 108 by extracting the dates of birth of their biological children from children's birth/immunization  
8  
9 109 certificates, and/or requesting children's dates of birth from participating mothers. Further  
10  
11 110 information regarding birth interval data collection is annexed (Supplementary Material I) and  
12  
13 111 a detailed description is provided elsewhere.<sup>2 3 43</sup>

### 17 112 **Control variables**

18  
19 113 After reviewing relevant literature,<sup>2 17-20 22-24 27 28 38 44 45</sup> Direct Acyclic Graphs (DAGs) were  
20  
21 114 constructed using DAGitty 3.0<sup>46</sup> to identify confounders for the association between short  
22  
23 115 birth interval and child mortality. Adjustment for such confounders is necessary to estimate  
24  
25 116 the unbiased effect of SBI on neonatal, infant, and under-five mortality (figure 1). Identified  
26  
27 117 confounders were maternal age at the birth of the index child, maternal education, maternal  
28  
29 118 occupation, husband's education, husband's occupation, household wealth status, the total  
30  
31 119 number of the preceding child, place of residence (urban/rural), administrative regions, access  
32  
33 120 to media, and decision making autonomy. A list of all variables considered in the DAG is  
34  
35 121 provided in Supplementary Material II.  
36  
37  
38  
39  
40  
41  
42  
43  
44  
45  
46  
47  
48  
49  
50  
51  
52  
53  
54  
55  
56  
57  
58  
59  
60

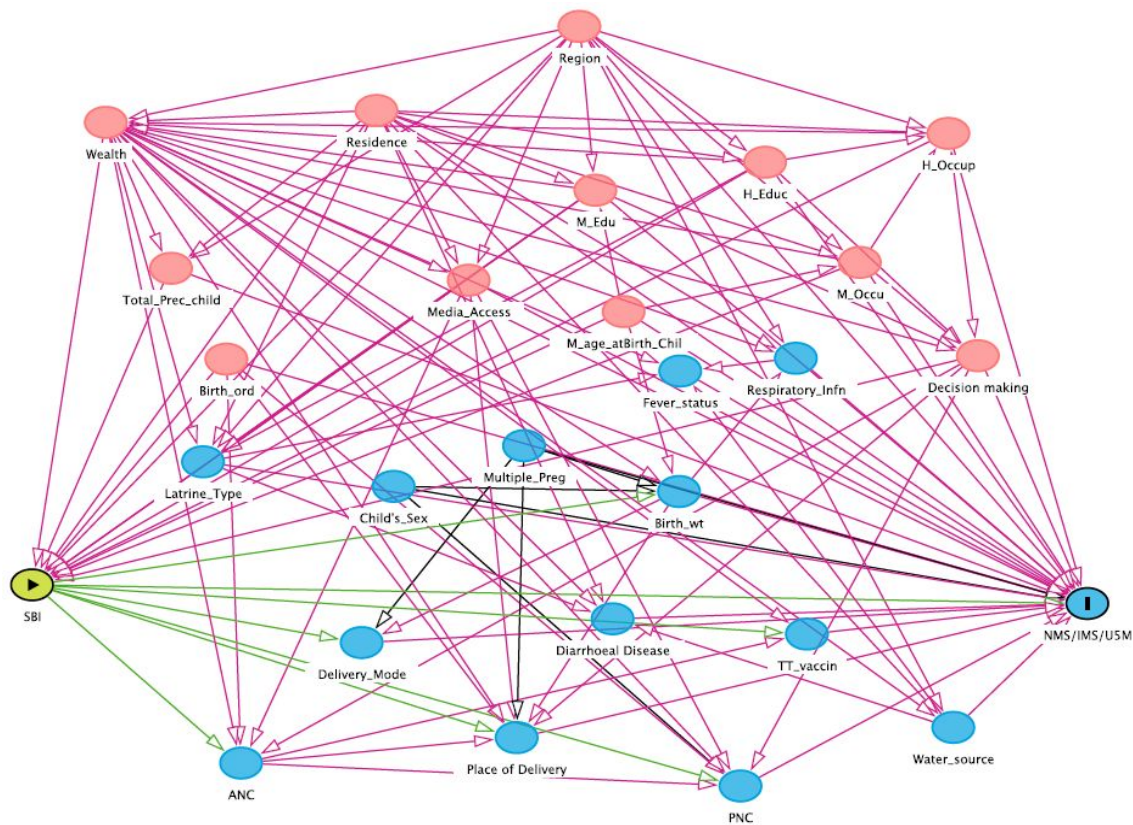

**Figure 1** Direct Acyclic Graph (DAG) used to select controlling variables

A yellowish-green circle with a triangle at its centre indicates the main treatment/exposure variable, a blue circle with a vertical bar at its centre indicates the outcome variable, light red circles indicate ancestors of exposure and outcome (i.e., confounders). Blue circles indicate the ancestors of the outcome variable. Green lines indicate a causal pathway. Red lines indicate open paths by which confounding may occur; this confounding can be removed by adjusting for one or several variables on the pathway.

M\_age\_atBirth\_chil= Maternal age at birth of the index child; M\_Edu= Maternal education; M\_Occu= Maternal Occupation; H\_Educ= Husband education; Birth\_wt=Birth weight; Respiratory\_infn= respiratory infection; Multiple\_preg= Multiple pregnancy; ANC=Antenatal care; PNC=Postnatal care; TT=Tetanus toxoid vaccination status; SBI= Short birth interval; NM=Neonatal mortality; IM=Infant mortality; U5M=Under-five mortal

## Data analyses

1  
2  
3 136 Given the outcomes were relatively infrequent, the unbiased effect of short birth interval on  
4  
5 137 each outcome was estimated using propensity scores (PS) with stabilized inverse probability  
6  
7  
8 138 of treatment weighting (IPTW). A propensity score is defined as the probability of treatment  
9  
10 139 assignment given observed baseline covariates (described in Supplementary Material II).<sup>47</sup>  
11  
12 140 Propensity scores are used to estimate treatment effects on outcomes using observational data  
13  
14  
15 141 when confounding bias due to non-random treatment assignment is likely.<sup>48</sup> Inverse probability  
16  
17 142 of treatment weighting weights the entire study sample by the inverse of the propensity score;<sup>49</sup>  
18  
19 143 a differential amount of information is used from each participant, depending on their  
20  
21 144 conditional probability of receiving treatment. This means observations are less likely to be  
22  
23  
24 145 lost than when using matching for confounder adjustment.<sup>50 51</sup> Propensity scores are a robust  
25  
26 146 alternative to covariate adjustment when the outcome variable is rare, resulting in data sparsity  
27  
28 147 and estimation issues in multivariable models.<sup>51</sup> In this study, the weighted prevalence of the  
29  
30 148 outcome variables of neonatal, infant, and under-five mortality were 2.9% (95% CI: 2.39, 3.61)  
31  
32 149 4.8% (95% CI: 4.11, 5.58), and 5.5% (95% CI: 4.73, 6.44), respectively.  
33  
34  
35 150 The analysis procedure was as follows. First, the propensity score was estimated using a  
36  
37 151 logistic regression model in which treatment assignment (short birth interval vs. non-short birth  
38  
39 152 interval) was regressed on the 11 covariates identified using the DAG. The balance of measured  
40  
41 153 covariates/confounders was then assessed across treatment groups (i.e., women with short birth  
42  
43 154 interval) and comparison groups (i.e., women with non-short birth interval) before and after  
44  
45 155 weighting, by computing standardized differences.<sup>51 52</sup> For a continuous covariate, the  
46  
47 156 standardized difference<sup>52 53</sup> is defined as:

$$d = \frac{(\bar{x}_{treatment} - \bar{x}_{control})}{\sqrt{\frac{s_{treatment}^2 + s_{control}^2}{2}}}$$

157 where  $\bar{x}_{treatment}$  and  $\bar{x}_{control}$  denote the sample mean of the covariate in treated and untreated  
 158 subjects, respectively and  $s_{treatment}^2$  and  $s_{control}^2$  denote the corresponding sample variances of  
 159 the covariate. The standardized difference<sup>52 53</sup> for a dichotomous variable is given as:

$$d = \frac{(\hat{p}_{treatment} - \hat{p}_{control})}{\sqrt{\frac{\hat{p}_{treatment}(1 - \hat{p}_{treatment}) + \hat{p}_{control}(1 - \hat{p}_{control})}{2}}}$$

160 where  $\hat{p}_{treatment}$  and  $\hat{p}_{control}$  denote the prevalence of the dichotomous variable in treated  
 161 and untreated subjects, respectively.

162 A standard difference less than 0.1 has been suggested as indicating a negligible difference in  
 163 the mean or prevalence of a covariate between treatment and control groups and was used  
 164 here.<sup>52</sup> In addition, kernel densities were plotted to graphically demonstrate the propensity  
 165 score balance in the treatment group (i.e., women with short birth interval) and control groups  
 166 (women with non-short birth interval). Balance in propensity scores was considered to be  
 167 achieved when the kernel density line for the treatment group and control group lay closer  
 168 together.<sup>54</sup> The inverse probability of treatment weights was then calculated as 1/PS for those  
 169 exposed to short birth interval and 1/(1 - PS) for those who were not. The sample was then  
 170 reweighted by the IPTW and the balance of the covariates checked in the reweighted  
 171 sample.<sup>48 55</sup> Stabilization of weights was made to preserve the sample size of the original  
 172 data, reduce the effect of weights of either treated subjects with low propensity scores or  
 173 untreated subjects with high propensity scores, and provides appropriate improve the  
 174 estimation of variance estimates and confidence intervals for the treatment effect.<sup>56</sup> Since  
 175 the EDHS employed a two-stage, stratified, clustered random sampling, which is a complex  
 176 sampling procedure, sampling weights were also used to adjust for the non-proportional  
 177 allocation of sample participants to different regions, including urban and rural areas, and  
 178 consider the possible differences in response rates.<sup>5</sup> Finally, a weighted logistic regression was  
 179 fit to estimate the effect of the treatment (short birth interval) on the outcome variables

1  
2  
3 180 (neonatal, infant, and under-five mortality). Estimation of the treatment effect on outcome  
4  
5 181 variables in the final model used the grand weight, which was formed as the product of the  
6  
7 182 survey weight and the stabilized weight. Literature has shown that combining a propensity  
8  
9 183 score method and survey weighting is necessary to estimate unbiased treatment effects which  
10  
11 184 are generalizable to the original survey target population.<sup>57</sup> The treatment effect on the outcome  
12  
13 185 variables was expressed as adjusted odds ratios (AORs) with a 95% confidence interval (CI).  
14  
15 186 Statistical analysis was performed using Stata version 14 statistical software (*StataCorp. Stata*  
16  
17 187 *Statistical Software: Release 14. College Station, TX: StataCorp LP. 2015*). Figure 2 presents  
18  
19  
20  
21 188 a schematic summary of the overall analysis procedure.

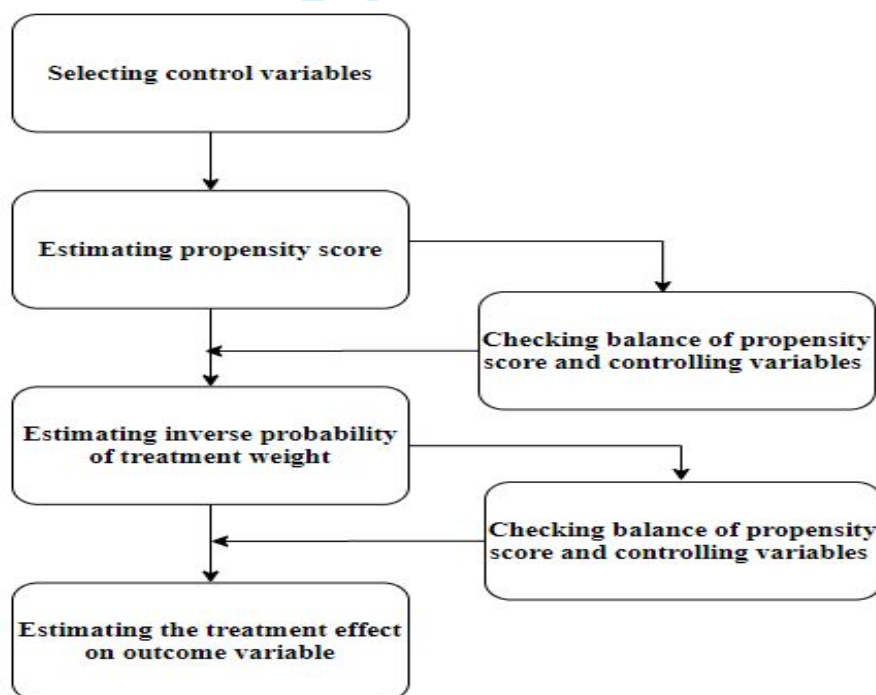

189  
190 **Figure 2** Schematic presentation of the overall steps followed in the analysis

## 191 **Patient and public involvement**

192 Patients and/or the general public were not involved in the design, or conduct, or drafting of  
193 this secondary analysis.

194

## 195 **Results**

### 196 **Respondents' characteristics**

197 Table 1 illustrates the baseline characteristics of the study participants.

198 The occurrence of neonatal mortality differed with maternal age at birth, with mortality rates  
199 being higher among mothers aged  $\geq 35$  ( $p=0.021$ ). Neonatal mortality was also higher in rural  
200 than in urban areas ( $p=0.004$ ). Similarly, infant mortality and under-five mortality were  
201 somewhat higher in rural areas ( $p<0.001$ ). Under-five mortality was higher among uneducated  
202 mothers ( $p=0.027$ ) and in mothers without access to mass media ( $p=0.043$ ). Mortality at all  
203 ages was higher among infants with at least five siblings ( $p<0.0001$ ). Both infant and under-  
204 five mortality had slightly higher rates among wealthier families, although numbers were small.

**Table 1** The weighted distribution of neonatal, infant, and under-five child mortality by background characteristics, EDHS 2016

| Variable                                                | Neonatal Mortality |            | P-value | Infant Mortality |            | P-value | Under-five Mortality |            | P-value |
|---------------------------------------------------------|--------------------|------------|---------|------------------|------------|---------|----------------------|------------|---------|
|                                                         | No (%)             | Yes (%)    |         | No (%)           | Yes (%)    |         | No (%)               | Yes (%)    |         |
| Maternal age at the birth of the index child (in years) |                    |            |         |                  |            |         |                      |            |         |
| ≤19                                                     | 291 (3.2)          | 17 (5.8)   | 0.021   | 283 (3.1)        | 25 (6.5)   | 0.065   | 280 (3.1)            | 28 (6.0)   | 0.068   |
| 20-24                                                   | 1950 (23.4)        | 52 (18.8)  |         | 1896 (23.2)      | 106 (23.7) |         | 1877 (23.3)          | 125 (23.0) |         |
| 25-29                                                   | 2587 (30.8)        | 67 (26.0)  |         | 2536 (30.8)      | 118 (27.6) |         | 2516 (30.8)          | 138 (27.4) |         |
| 30-34                                                   | 1836 (22.7)        | 59 (22.6)  |         | 1802 (22.9)      | 93 (21.0)  |         | 1781 (22.7)          | 114 (22.9) |         |
| ≥35                                                     | 1533 (19.9)        | 56 (26.8)  |         | 1515 (20.0)      | 74 (21.2)  |         | 1500 (20.1)          | 89 (20.7)  |         |
| Maternal education                                      |                    |            |         |                  |            |         |                      |            |         |
| Uneducated                                              | 5890 (73.9)        | 182 (75.0) | 0.859   | 5759 (73.8)      | 313 (75.9) | 0.157   | 5694 (73.9)          | 378 (75.5) | 0.027   |
| Primary                                                 | 1744 (22.0)        | 54 (19.7)  |         | 1715 (22.0)      | 83 (20.8)  |         | 1704 (22.0)          | 94 (21.1)  |         |
| Secondary+                                              | 563 (4.1)          | 15 (5.3)   |         | 558 (4.2)        | 20 (3.3)   |         | 556 (4.1)            | 22 (3.4)   |         |
| Maternal occupation                                     |                    |            |         |                  |            |         |                      |            |         |
| Not employed                                            | 5935 (72.9)        | 178 (74.6) | 0.604   | 5807 (72.9)      | 306 (73.2) | 0.575   | 5747 (72.9)          | 366 (73.6) | 0.376   |
| Employed                                                | 2267 (27.1)        | 73 (25.4)  |         | 2225 (27.1)      | 110 (26.8) |         | 2207 (27.1)          | 128 (26.4) |         |
| Husband education                                       |                    |            |         |                  |            |         |                      |            |         |
| Uneducated                                              | 4186 (49.9)        | 145 (53.2) | 0.092   | 4104 (50.0)      | 227 (50.1) | 0.346   | 4057 (50.0)          | 274 (49.0) | 0.154   |
| Primary                                                 | 2482 (37.3)        | 69 (34.6)  |         | 2437 (37.3)      | 114 (36.2) |         | 2416 (37.3)          | 135 (37.1) |         |
| Secondary+                                              | 1529 (12.8)        | 37 (12.2)  |         | 1491 (12.7)      | 75 (13.7)  |         | 1481 (12.7)          | 85 (13.9)  |         |
| Husband occupation                                      |                    |            |         |                  |            |         |                      |            |         |
| Not employed                                            | 873 (7.7)          | 22 (6.6)   | 0.339   | 846 (7.6)        | 49 (7.7)   | 0.421   | 838 (7.6)            | 57 (7.4)   | 0.482   |
| Employed                                                | 7324 (92.3)        | 229 (93.4) |         | 7186 (92.4)      | 367 (92.3) |         | 7116 (92.4)          | 437 (92.6) |         |
| Wealth                                                  |                    |            |         |                  |            |         |                      |            |         |
| Poorest                                                 | 3238 (25.4)        | 109 (15.6) | 0.248   | 3163 (25.3)      | 184 (21.5) | 0.015   | 3118 (25.3)          | 229 (22.2) | <0.001  |
| Poorer                                                  | 1430 (23.4)        | 48 (22.5)  |         | 1400 (23.4)      | 78 (22.2)  |         | 1390 (23.5)          | 88 (21.3)  |         |
| Middle                                                  | 1167 (21.1)        | 36 (22.8)  |         | 1147 (21.3)      | 56 (20.0)  |         | 1136 (21.2)          | 67 (20.7)  |         |
| Richer                                                  | 1025 (17.8)        | 30 (24.8)  |         | 1000 (17.7)      | 55 (23.3)  |         | 993 (17.6)           | 62 (23.7)  |         |
| Richest                                                 | 1337 (12.3)        | 28 (14.3)  |         | 1322 (12.3)      | 43 (13.0)  |         | 1317 (12.3)          | 48 (12.1)  |         |

|                                 |             |            |          |             |            |          |             |            |        |
|---------------------------------|-------------|------------|----------|-------------|------------|----------|-------------|------------|--------|
| Total number of preceding child |             |            |          |             |            |          |             |            |        |
| ≤2                              | 2627 (31.0) | 57 (27.0)  | <0.001   | 2591 (31.0) | 93 (27.1)  | <0.001   | 2575 (31.1) | 109 (26.4) | <0.001 |
| 3-4                             | 2561 (30.6) | 77 (22.0)  |          | 2505 (30.7) | 133 (23.6) |          | 2482 (30.7) | 156 (24.6) |        |
| ≥5                              | 3009 (38.4) | 117 (50.9) |          | 2936 (38.2) | 190 (49.3) |          | 2897 (38.2) | 229 (49.0) |        |
| Residence                       |             |            |          |             |            |          |             |            |        |
| Urban                           | 1264 (8.8)  | 22 (12.0)  | 0.004    | 1251 (8.9)  | 35 (8.7)   | <0.001   | 1248 (9.0)  | 38 (7.7)   | <0.001 |
| Rural                           | 6933 (91.2) | 229 (88.0) |          | 6781 (91.1) | 381 (91.3) |          | 6706 (91.0) | 456 (92.3) |        |
| Region                          |             |            |          |             |            |          |             |            |        |
| Tigray                          | 765 (6.0)   | 23 (6.1)   | 0.516    | 762 (6.1)   | 26 (4.1)   | 0.145    | 752 (6.1)   | 36 (5.3)   | 0.039  |
| Afar                            | 808 (1.0)   | 20 (0.7)   |          | 779 (1.0)   | 49 (1.2)   |          | 762 (1.0)   | 66 (1.4)   |        |
| Amhara                          | 774 (18.7)  | 26 (22.2)  |          | 765 (18.8)  | 35 (17.9)  |          | 761 (18.9)  | 39 (17.2)  |        |
| Oromia                          | 1270 (44.7) | 37 (45.5)  |          | 1245 (44.6) | 62 (47.9)  |          | 1235 (44.6) | 72 (47.1)  |        |
| Somali                          | 1231(5.0)   | 52 (6.3)   |          | 1210 (4.9)  | 73 (5.4)   |          | 1203 (4.9)  | 80 (5.1)   |        |
| Benishangul-Gumuz               | 711 (1.1)   | 24 (1.0)   |          | 690 (1.1)   | 45 (1.3)   |          | 682 (1.1)   | 53 (1.4)   |        |
| SNNPR***                        | 1021 (21.2) | 23 (16.0)  |          | 995 (21.1)  | 49 (20.4)  |          | 987 (21.1)  | 57 (20.9)  |        |
| Gambella,                       | 541 (0.2)   | 16 (0.2)   |          | 531 (0.2)   | 26 (0.2)   |          | 522 (0.2)   | 35 (0.2)   |        |
| Harari                          | 443 (0.2)   | 13 (0.2)   |          | 429 (0.2)   | 27 (0.2)   |          | 427 (0.2)   | 29 (0.2)   |        |
| Addis Ababa                     | 246 (1.5)   | 6 (1.2)    |          | 245 (1.5)   | 7 (1.0)    |          | 245 (1.5)   | 7 (0.8)    |        |
| Dire Dawa                       | 387 (0.4)   | 11 (0.4)   | 381(0.4) | 17 (0.4)    | 378 (0.4)  | 20 (0.4) |             |            |        |
| Access to mass media            |             |            |          |             |            |          |             |            |        |
| Yes                             | 1408 (15.8) | 36 (23.2)  | 0.240    | 1383 (15.9) | 61 (20.2)  | 0.177    | 1376 (15.9) | 68 (19.0)  | 0.043  |
| No                              | 6789 (84.2) | 215 (76.8) |          | 6649 (84.1) | 355 (79.8) |          | 6578 (84.1) | 426 (81.0) |        |
| Decision making autonomy        |             |            |          |             |            |          |             |            |        |
| Yes                             | 6014 (77.7) | 179 (74.9) | 0.469    | 5898 (77.8) | 295 (73.8) | 0.258    | 5848        | 345        | 0.072  |
| No                              | 2183 (22.3) | 72 (25.1)  |          | 2134 (22.2) | 121 (26.2) |          | 2106        | 149        |        |

\*\*\*SNNPR= Southern Nations, Nationalities, and Peoples' Region; EDHS= Ethiopia Demographic and Health Survey



## Balance diagnostics

### Propensity score balance

Figure 3 presents the density plot of women in the treatment group (dashed lines) and control group (solid lines) before and after weighting. It reveals that an adequate balance of the propensity score distribution between the treatment groups after weighting (Figure 3).

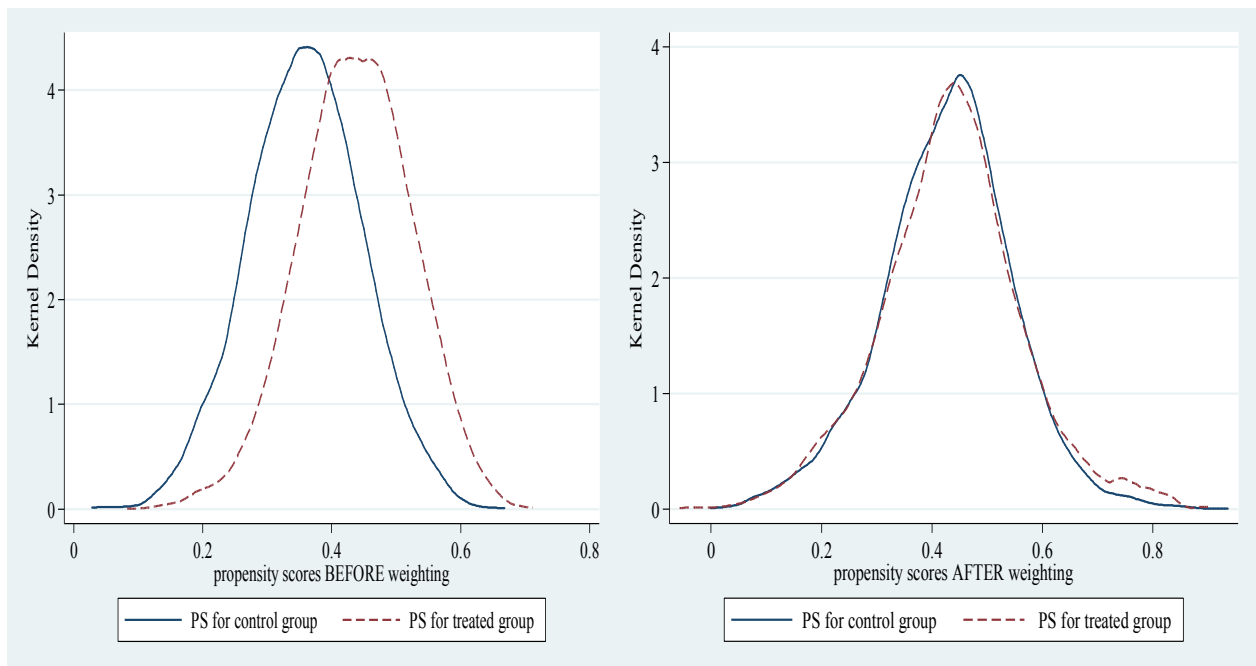

**Figure 3** Balance of propensity scores before and after weighting across treatment and comparison groups

PS= propensity score

### Covariate balance

After weighting adjustment, standardized differences of covariates were all less than 0.1 (10%), showing comparability between women with and without short birth interval (Supplementary Material III).

### Treatment effect estimation

Table 2 presents the estimated effects of short birth interval on neonatal, infant, and under-five mortality. The adjusted estimated odds of neonatal mortality were 53% higher among women who experienced short birth interval (AOR=1.53, 95% CI= 1.13, 2.09) than those who did not. Similarly, the odds of infant mortality were 94% higher (AOR=1.94, 95% CI= 1.39, 2.70) among women who experienced short birth interval compared with women who did not. The odds of under-five child mortality were two times (AOR=2.02, 95% CI= 1.48, 2.74) higher among women who were exposed to short birth interval compared with women who were not.

**Table 2** The effect of short birth interval on neonatal, infant, and under-five mortality in Ethiopia, EDHS 2016

| Treatment variable   | Neonatal mortality   |            | AOR (95% CI)      |
|----------------------|----------------------|------------|-------------------|
|                      | No (%)*              | Yes (%)*   |                   |
| Short birth interval |                      |            |                   |
| No                   | 4166 (54.5)          | 95 (46.1)  | Ref               |
| Yes                  | 4031 (45.5)          | 156 (53.9) | 1.53 (1.13, 2.09) |
|                      | Infant mortality     |            |                   |
| Short birth interval | No (%)               | Yes (%)    |                   |
| No                   | 4126 (54.9)          | 135 (40.5) | Ref               |
| Yes                  | 3906 (45.1)          | 281 (59.5) | 1.94 (1.39, 2.70) |
|                      | Under-Five mortality |            |                   |
| Short Birth interval | No (%)               | Yes (%)    |                   |
| No                   | 4099 (55.1)          | 162 (39.3) | Ref               |
| Yes                  | 3855 (44.9)          | 332 (60.7) | 2.02 (1.48, 2.74) |

EDHS= Ethiopia Demographic and Health Survey; AOR= Adjusted Odds Ratio; CI= Confidence Interval; Ref= reference group; (%)\*=percentage are weighted

## Discussion

To our knowledge, this study provides the first comprehensive assessment of the effect of short birth interval on neonatal, infant, and under-five mortality using the WHO recommendation to define short birth interval and applying rigorous analytical techniques to adjust for potential confounders. This study provides evidence that short birth interval is associated with neonatal, infant, and under-five mortality in Ethiopia. These findings will help policy

1  
2  
3 makers and program planners formulate targeted interventions to increase birth intervals and  
4 contribute to achieving the GTPE and SDGs target of reducing neonatal, infant, and under-  
5 five mortality.<sup>16 15</sup>  
6  
7  
8  
9

10 In this current study, short birth interval was found to be associated with higher odds of  
11 neonatal mortality. This finding is consistent with evidence from the previous studies<sup>22 24 58-</sup>  
12  
13  
14  
15  
16  
17  
18  
19  
20  
21  
22  
23  
24  
25  
26  
27  
28  
29  
30  
31  
32  
33  
34  
35  
36  
37  
38  
39  
40  
41  
42  
43  
44  
45  
46  
47  
48  
49  
50  
51  
52  
53  
54  
55  
56  
57  
58  
59  
60  
61 which have shown a higher risk of neonatal mortality among women with a short birth  
interval. However, the definition of short birth interval (i.e., <33 months) used in the current  
study was in line with the WHO definition and longer than those used in previous studies (i.e.,  
ranges from <18 to 24 months). Short birth interval could result in adverse neonatal child health  
outcomes, such as death, by causing maternal nutritional depletion, specifically folate  
depletion.<sup>62 63</sup> The maternal nutritional depletion hypothesis states that a short birth-to-  
pregnancy/birth interval worsens the mother's nutritional status because of inadequate time to  
recover from the physiological stresses of the subsequent pregnancy.<sup>64</sup> This may compromise  
maternal nutritional status and ability to support fetal growth, which could result in fetal  
malnutrition and increased risk of infection and death during childhood.<sup>62</sup> Women with short  
birth interval may also be less likely to attend postnatal care, which is vital for early detection  
and treatment of neonatal and maternal health problems. Evidence has shown that the majority  
of mothers and newborns in low- and middle-income countries do not receive optimal postnatal  
care<sup>65</sup>, yet close to half of the newborn deaths occurred within the first 24 hours after birth, a  
critical time where mothers and their babies should get their first postnatal care.<sup>66</sup>

Our study found that infant mortality was 94% higher among women who experienced short  
birth interval compared with women who did not. Our finding was consistent with evidence  
from Ethiopia,<sup>17 31</sup> Kenya,<sup>67 68</sup> Nepal,<sup>69</sup> and Iran<sup>70</sup> although the cut-off point for short birth  
interval in the current study was longer than the previous studies. The abovementioned  
previous studies also documented that the risk of infant mortality was higher among women

1  
2  
3 who experienced short birth interval compared with women who did not. One of the possible  
4 reasons for the effect of short birth interval on infant mortality could be low maternal  
5 motivation to breastfeed (for example, if the pregnancy was unintended).<sup>71</sup> Maternal  
6 perception of being undernourished due to a short birth interval may also influence her infant  
7 feeding choices, such as the duration and intensity of breastfeeding and supplemental  
8 feeding of the infant. This could in turn affect infants' nutritional status, their resistance to  
9 infection, and may expose them to death.<sup>71-74</sup> The abovementioned links between short birth  
10 interval and neonatal mortality also apply to infant mortality.  
11  
12

13  
14  
15 Short birth interval doubled the odds of under-five mortality compared with non-short birth  
16 interval. Despite not using the WHO recommendation<sup>1</sup> of less than 33 months to define short  
17 birth interval, the existing literature<sup>23 29 58 59 75</sup> also supported our finding. The likely mechanism  
18 through which short birth interval affects under-five mortality could be competition between  
19 closely spaced siblings for limited household resources, maternal attention, and cross-  
20 infection.<sup>71</sup> Moreover, children born within a short birth interval may not receive their  
21 vaccination at all or complete their booster series, which is one of the risk factors that  
22 exposed children to the infectious disease and its associated death.<sup>76-78</sup> Women with short  
23 birth interval could be burdened with caring for highly dependent children<sup>72</sup> and other  
24 domestic activities. As a result, they may lack the time and motivation to take children to  
25 the health facility for vaccination and other services.  
26  
27  
28  
29  
30  
31  
32  
33  
34  
35  
36  
37  
38  
39  
40  
41  
42  
43  
44  
45  
46  
47

48 The results of this study need to be interpreted within the limitations of the observational  
49 study design. Due to the cross-sectional nature of the study, temporal associations between  
50 short birth interval and neonatal, infant, and under-five mortality may not be established.  
51  
52

53 One of the strengths of the current study was its use of data from a nationally representative  
54 survey with a large sample size. In addition, this study used robust statistical methods to  
55  
56  
57  
58  
59  
60

1  
2  
3 estimate the unbiased effect of the treatment group (short birth interval) on the outcome  
4 variables (neonatal, infant, and under-five mortality), by using causal diagrams to identify  
5 confounders a priori. The application of DAGs,<sup>79-81</sup> a graphical tool used to identify  
6 confounding variables by specifying causal paths among treatment/exposure, outcome, and  
7 other causally related variables was another strength of this study.  
8  
9  
10  
11  
12  
13  
14

## 15 **Conclusion**

16  
17  
18  
19 This study provides evidence that short birth interval has a significant effect on neonatal,  
20 infant, and under-five mortality in Ethiopia. Interventions aiming to reduce neonatal, infant,  
21 and under-five mortality in Ethiopia should target the prevention of short birth interval.  
22  
23 These could be achieved through creating awareness on the optimum birth interval and the  
24 negative impacts of shorter birth intervals on the health of children. Further expanding the  
25 availability and accessibility of family planning services also help women achieve optimum  
26 birth interval. Birth interval counseling as per the WHO recommendation should be  
27 integrated into the maternal and child health services as part of the child survival  
28 intervention.  
29  
30  
31  
32  
33  
34  
35  
36  
37  
38  
39

## 40 **Author affiliations**

41  
42  
43  
44 <sup>1</sup> Saint Paul's Hospital Millennium Medical College, Addis Ababa, Ethiopia  
45

46  
47 <sup>2</sup>Priority Research Centre for Generational Health and Ageing, School of Medicine and  
48 Public Health, University of Newcastle, Newcastle, New South Wales, Australia  
49

50  
51  
52 <sup>3</sup>Centre for Clinical Epidemiology and Biostatistics, School of Medicine and Public Health,  
53 University of Newcastle, Newcastle, New South Wales, Australia  
54  
55  
56  
57  
58  
59  
60

## Acknowledgment

We are grateful to The DHS Program for allowing us to use the Ethiopia Demographic and Health Survey (EDHS) data for further analysis.

## Contributors

All authors (DMS, CC, EGH, and DL) contributed to the design of the study and the interpretation of data. DM performed the data analysis and drafted the manuscript. All authors (DMS, CC, EGH, and DL) read, critically revised, and approved the final manuscript.

## Funding

The authors received no specific funding for this work.

## Competing interests

The authors declare that they have no competing interests.

## Ethics approval

The 2016 EDHS was approved by the National Research Ethics Review Committee of Ethiopia (NRERC) and ICF Macro International. Permission from The DHS Program was obtained to use the 2016 EDHS data for further analysis. This analysis was also approved by The University of Newcastle Human Research Ethics Committee (H-2018-0332).

## Consent for publication

Not required

## Provenance and peer review

Not commissioned; externally peer reviewed.

## Data availability statement

The dataset is available from The DHS Program repository at the following link:

[https://www.dhsprogram.com/data/dataset/Ethiopia\\_Standard-DHS\\_2016.cfm?flag=0](https://www.dhsprogram.com/data/dataset/Ethiopia_Standard-DHS_2016.cfm?flag=0).

## References

1. World Health Organization. Report of a WHO Technical Consultation on Birth Spacing. *Geneva, Switzerland* 13-15 June 2005.
2. Shifti DM, Chojenta C, G. Holliday E, et al. Individual and community level determinants of short birth interval in Ethiopia: A multilevel analysis. *PloS one* 2020;15(1):e0227798.
3. Shifti DM, Chojenta C, Holliday EG, et al. Application of geographically weighted regression analysis to assess predictors of short birth interval hot spots in Ethiopia. *PloS one* 2020;15(5):e0233790.
4. Shifti DM, Chojenta C, Holliday EG, et al. Socioeconomic inequality in short birth interval in Ethiopia: a decomposition analysis. *BMC public health* 2020;20(1):1-13.
5. Central Statistical Agency (CSA) [Ethiopia] and ICF. Ethiopia Demographic and Health Survey 2016. *Addis Ababa, Ethiopia, and Rockville, Maryland, USA: CSA and ICF* 2016.
6. Grisaru-Granovsky S, Gordon E-S, Haklai Z, et al. Effect of interpregnancy interval on adverse perinatal outcomes—a national study. *Contraception* 2009;80(6):512-18.

- 1  
2  
3 7. Adam I, Ismail MH, Nasr AM, et al. Low birth weight, preterm birth and short  
4  
5 interpregnancy interval in Sudan. *The Journal of Maternal-Fetal & Neonatal Medicine*  
6  
7 2009;22(11):1068-71.  
8  
9
- 10 8. Chen I, Jhangri GS, Chandra S. Relationship between interpregnancy interval and congenital  
11  
12 anomalies. *American journal of obstetrics and gynecology* 2014;210(6):564. e1-8.  
13  
14
- 15 9. Kwon S, Lazo-Escalante M, Villaran M, et al. Relationship between interpregnancy interval  
16  
17 and birth defects in Washington State. *Journal of Perinatology* 2012;32(1):45.  
18  
19
- 20 10. Cheslack-Postava K, Liu K, Bearman PS. Closely spaced pregnancies are associated with  
21  
22 increased odds of autism in California sibling births. *Pediatrics* 2011;127:246-53.  
23  
24
- 25 11. DaVanzo J, Razzaque A, Rahman M, et al. The effects of birth spacing on infant and child  
26  
27 mortality, pregnancy outcomes, and maternal morbidity and mortality in Matlab,  
28  
29 Bangladesh. *Technical Consultation and Review of the Scientific Evidence for Birth*  
30  
31 *Spacing* 2004.  
32
- 33 12. DaVanzo J, Hale L, Razzaque A, et al. Effects of interpregnancy interval and outcome of  
34  
35 the preceding pregnancy on pregnancy outcomes in Matlab, Bangladesh. *BJOG: An*  
36  
37 *International Journal of Obstetrics & Gynaecology* 2007;114(9):1079-87.  
38  
39
- 40 13. Gonzalez RM, Gilleskie D. Infant mortality rate as a measure of a country's health: a robust  
41  
42 method to improve reliability and comparability. *Demography* 2017;54(2):701-20.  
43  
44
- 45 14. Reidpath DD, Allotey P. Infant mortality rate as an indicator of population health. *Journal*  
46  
47 *of Epidemiology & Community Health* 2003;57(5):344-46.  
48  
49
- 50 15. UN. Transforming our World: The 2030 Agenda For Sustainable Development Goal  
51  
52 (A/RES/70/1). 2015.  
53
- 54 16. National Planning Commission. Federal Democratic Republic of Ethiopia: Growth and  
55  
56 Transformation Plan II (GTP II) (2015/16-2019/20). *Addis Ababa, Ethiopia* 2016.  
57  
58  
59  
60



- 1  
2  
3 17. Abate MG, Angaw DA, Shaweno T. Proximate determinants of infant mortality in Ethiopia,  
4  
5 2016 Ethiopian demographic and health surveys: results from a survival analysis.  
6  
7 *Archives of Public Health* 2020;78(1):1-10.  
8  
9
- 10 18. Weldearegawi B, Melaku YA, Abera SF, et al. Infant mortality and causes of infant deaths  
11  
12 in rural Ethiopia: a population-based cohort of 3684 births. *BMC public health*  
13  
14 2015;15(1):770.  
15  
16
- 17 19. Wolde HF, Gonete KA, Akalu TY, et al. Factors affecting neonatal mortality in the general  
18  
19 population: evidence from the 2016 Ethiopian Demographic and Health Survey  
20  
21 (EDHS)—multilevel analysis. *BMC research notes* 2019;12(1):610.  
22  
23
- 24 20. Roro EM, Tumtu MI, Gebre DS. Predictors, causes, and trends of neonatal mortality at  
25  
26 Nekemte Referral Hospital, east Wollega Zone, western Ethiopia (2010–2014).  
27  
28 Retrospective cohort study. *PloS one* 2019;14(10):e0221513.  
29  
30
- 31 21. Seid SS, Ibro SA, Ahmed AA, et al. Causes and factors associated with neonatal mortality  
32  
33 in neonatal intensive care unit (NICU) of Jimma University medical center, Jimma,  
34  
35 south West Ethiopia. *Pediatric health, medicine and therapeutics* 2019;10:39.  
36  
37
- 38 22. Wakgari N, Wencheke E. Risk factors of neonatal mortality in Ethiopia. *Ethiopian Journal*  
39  
40 *of Health Development* 2013;27(3):192-99.  
41  
42
- 43 23. Fikru C, Getnet M, Shaweno T. Proximate Determinants of Under-Five Mortality in  
44  
45 Ethiopia: Using 2016 Nationwide Survey Data. *Pediatric Health, Medicine and*  
46  
47 *Therapeutics* 2019;10:169.  
48  
49
- 50 24. Mekonnen Y, Tensou B, Telake DS, et al. Neonatal mortality in Ethiopia: trends and  
51  
52 determinants. *BMC public health* 2013;13(1):483.  
53  
54
- 55 25. Limaso AA, Dangisso MH, Hibstu DT. Neonatal survival and determinants of mortality in  
56  
57 Aroresa district, Southern Ethiopia: a prospective cohort study. *BMC pediatrics*  
58  
59 2020;20(1):33.  
60

- 1  
2  
3 26. Yaya Y, Eide KT, Norheim OF, et al. Maternal and neonatal mortality in south-west  
4 Ethiopia: estimates and socio-economic inequality. *PloS one* 2014;9(4):e96294.  
5  
6  
7  
8 27. Gebretsadik S, Gabreyohannes E. Determinants of under-five mortality in high mortality  
9 regions of Ethiopia: an analysis of the 2011 Ethiopia Demographic and Health Survey  
10 data. *International Journal of Population Research* 2016;2016.  
11  
12  
13  
14 28. Negera A, Abelti G, Bogale T, et al. An analysis of the trends, differentials and key  
15 proximate determinants of infant and under-five mortality in Ethiopia. Further Analysis  
16 of the 2000, 2005, and 2011 Demographic and Health Surveys. *DHS Further Analysis*  
17 *Reports No 79 Calverton, Maryland, USA: ICF International* 2013.  
18  
19  
20  
21  
22  
23 29. Tariku L. Effects of preceding birth intervals on child mortality in Ethiopia; Evidence from  
24 the Demographic and Health Surveys, 2016. *Epidemiology International Journal*  
25 2019;3(1).  
26  
27  
28  
29  
30 30. Hailemariam A, Tesfaye M. Determinants of infant and early childhood mortality in a small  
31 urban community of Ethiopia: a hazard model analysis. *The Ethiopian Journal of*  
32 *Health Development (EJHD)* 1997;11(3).  
33  
34  
35  
36  
37 31. Dadi AF. A systematic review and meta-analysis of the effect of short birth interval on  
38 infant mortality in Ethiopia. *PloS one* 2015;10(5):e0126759.  
39  
40  
41  
42 32. Sahle-Mariam Y, Berhane Y. Neonatal mortality among hospital delivered babies in Addis  
43 Ababa, Ethiopia. *The Ethiopian Journal of Health Development (EJHD)* 1997;11(3)  
44  
45  
46  
47 33. Kolobo HA, Chaka TE, Kassa RT. Determinants of neonatal mortality among newborns  
48 admitted to neonatal intensive care unit Adama, Ethiopia: A case-control study.  
49 *Journal of Clinical Neonatology* 2019;8(4):232.  
50  
51  
52  
53 34. Bogale TN, Worku AG, Bikis GA, et al. Why gone too soon? Examining social  
54 determinants of neonatal deaths in northwest Ethiopia using the three delay model  
55 approach. *BMC pediatrics* 2017;17(1):216.  
56  
57  
58  
59  
60

- 1  
2  
3 35. Woldeamanuel BT. Statistical analysis of neonatal mortality: a case study of Ethiopia.  
4  
5 *Journal of Pregnancy and Child Health* 2018;5(2):1-11.  
6  
7  
8 36. Asefa M, Drewett R, Tessema F. A birth cohort study in South-West Ethiopia to identify  
9  
10 factors associated with infant mortality that are amenable for intervention. *Ethiopian*  
11  
12 *Journal of Health Development* 2000;14(2):161-68.  
13  
14  
15 37. Muluye S, Wencheke E. Determinants of infant mortality in Ethiopia: A study based on the  
16  
17 2005 EDHS data. *Ethiopian Journal of Health Development* 2012;26(2):72-77.  
18  
19  
20 38. Deribew A, Tessema F, Girma B. Determinants of under-five mortality in Gilgel gibe field  
21  
22 research center, Southwest Ethiopia. *Ethiopian Journal of Health Development*  
23  
24 2007;21(2):117-24.  
25  
26  
27 39. Bedada D. Determinant of under-five child mortality in Ethiopia. *American Journal of*  
28  
29 *Theoretical and Applied Statistics* 2017;6(4):198-204.  
30  
31  
32 40. Ayele DG, Zewotir TT. Comparison of under-five mortality for 2000, 2005 and 2011  
33  
34 surveys in Ethiopia. *BMC public health* 2016;16(1):930.  
35  
36  
37 41. Shamebo D, Sandström A, Muhe L, et al. The Butajira project in Ethiopia: a nested case-  
38  
39 referent study of under-five mortality and its public health determinants. *Bulletin of the*  
40  
41 *World Health Organization* 1993;71(3-4):389.  
42  
43  
44 42. Croft TN, Aileen M. J. Marshall, Courtney K. Allen, et al. Guide to DHS Statistics.  
45  
46 *Rockville, Maryland, USA: ICF* 2018.  
47  
48  
49 43. ICF International. Demographic and Health Survey Interviewer's Manual. *MEASURE DHS*  
50  
51 *Basic Documentation No 2 Calverton, Maryland, USA: ICF International* 2012  
52  
53  
54 44. Hailu D, Gulte T. Determinants of Short Interbirth Interval among Reproductive Age  
55  
56 Mothers in Arba Minch District, Ethiopia. *International journal of reproductive*  
57  
58 *medicine* 2016;2016 doi: 10.1155/2016/6072437  
59  
60

- 1  
2  
3 45. Yohannes S, Wondafrash M, Abera M, et al. Duration and determinants of birth interval  
4 among women of child bearing age in Southern Ethiopia. *BMC pregnancy and*  
5 *childbirth* 2011;11(1):38.  
6  
7  
8  
9  
10 46. Textor J, van der Zander B, Gilthorpe MS, et al. Robust causal inference using directed  
11 acyclic graphs: the R package ‘dagitty’. *International journal of epidemiology*  
12 2016;45(6):1887-94.  
13  
14  
15  
16 47. Rosenbaum PR, Rubin DB. The central role of the propensity score in observational studies  
17 for causal effects. *Biometrika* 1983;70(1):41-55.  
18  
19  
20 48. Garrido MM, Kelley AS, Paris J, et al. Methods for constructing and assessing propensity  
21 scores. *Health services research* 2014;49(5):1701-20.  
22  
23  
24  
25 49. Austin PC. A tutorial and case study in propensity score analysis: an application to  
26 estimating the effect of in-hospital smoking cessation counseling on mortality.  
27 *Multivariate behavioral research* 2011;46(1):119-51.  
28  
29  
30  
31  
32 50. Guo S, Fraser MW. Propensity score analysis: Statistical methods and applications: SAGE  
33 publications 2014.  
34  
35  
36  
37 51. Deb S, Austin PC, Tu JV, et al. A review of propensity-score methods and their use in  
38 cardiovascular research. *Canadian Journal of Cardiology* 2016;32(2):259-65.  
39  
40  
41  
42 52. Austin PC. An introduction to propensity score methods for reducing the effects of  
43 confounding in observational studies. *Multivariate behavioral research*  
44 2011;46(3):399-424.  
45  
46  
47  
48 53. Austin PC, Stuart EA. Moving towards best practice when using inverse probability of  
49 treatment weighting (IPTW) using the propensity score to estimate causal treatment  
50 effects in observational studies. *Statistics in medicine* 2015;34(28):3661-79.  
51  
52  
53  
54  
55  
56  
57  
58  
59  
60

- 1  
2  
3 54. Austin PC. Balance diagnostics for comparing the distribution of baseline covariates  
4  
5 between treatment groups in propensity-score matched samples. *Statistics in medicine*  
6  
7 2009;28(25):3083-107.  
8  
9
- 10 55. Rosenbaum PR, Rubin DB. Constructing a control group using multivariate matched  
11  
12 sampling methods that incorporate the propensity score. *The American Statistician*  
13  
14 1985;39(1):33-38.  
15  
16
- 17 56. Xu S, Ross C, Raebel MA, et al. Use of stabilized inverse propensity scores as weights to  
18  
19 directly estimate relative risk and its confidence intervals. *Value in Health*  
20  
21 2010;13(2):273-77.  
22  
23
- 24 57. DuGoff EH, Schuler M, Stuart EA. Generalizing observational study results: applying  
25  
26 propensity score methods to complex surveys. *Health services research*  
27  
28 2014;49(1):284-303.  
29  
30
- 31 58. Rutstein SO. Effects of preceding birth intervals on neonatal, infant and under-five years  
32  
33 mortality and nutritional status in developing countries: evidence from the demographic  
34  
35 and health surveys. *International Journal of Gynecology & Obstetrics* 2005;89:S7-S24.  
36  
37
- 38 59. Kozuki N, Walker N. Exploring the association between short/long preceding birth  
39  
40 intervals and child mortality: using reference birth interval children of the same mother  
41  
42 as comparison. *BMC public health* 2013;13(S3):S6.  
43  
44
- 45 60. Rahman MM, Abidin S. Factors affecting neonatal mortality in Bangladesh. *Journal of*  
46  
47 *Health Management* 2010;12(2):137-52.  
48  
49
- 50 61. Ezeh OK, Agho KE, Dibley MJ, et al. Determinants of neonatal mortality in Nigeria:  
51  
52 evidence from the 2008 demographic and health survey. *BMC Public Health*  
53  
54 2014;14(1):521.  
55  
56  
57  
58  
59  
60

- 1  
2  
3 62. Conde-Agudelo A, Rosas-Bermudez A, Castaño F, et al. Effects of birth spacing on  
4 maternal, perinatal, infant, and child health: a systematic review of causal mechanisms.  
5  
6  
7  
8 *Studies in family planning* 2012;43(2):93-114.  
9
- 10 63. Rousso D, Panidis D, Gkoutzioulis F, et al. Effect of the interval between pregnancies on  
11 the health of mother and child. *European Journal of Obstetrics and Gynecology and*  
12  
13  
14  
15 *Reproductive Biology* 2002;105(1):4-6.  
16
- 17 64. King JC. The risk of maternal nutritional depletion and poor outcomes increases in early or  
18 closely spaced pregnancies. *The Journal of nutrition* 2003;133(5):1732S-36S.  
19
- 20 65. WHO. Maternal, newborn, child and adolescent health: Postnatal care. [cited 11 July  
21  
22  
23  
24 2020]. Available from:  
25  
26 [https://www.who.int/maternal\\_child\\_adolescent/topics/newborn/postnatal\\_care/en/](https://www.who.int/maternal_child_adolescent/topics/newborn/postnatal_care/en/)  
27  
28 accessed 2020 11 July  
29
- 30 66. WHO, USAID, MCHIP, et al. Postnatal Care for Mothers and Newborns: Highlights from  
31 the World Health Organization 2013 Guidelines. 2015  
32  
33
- 34 67. Omariba DWR, Beaujot R, Rajulton F. Determinants of infant and child mortality in Kenya:  
35 an analysis controlling for frailty effects. *Population Research and Policy Review*  
36  
37  
38  
39  
40  
41 2007;26(3):299-321.  
42
- 43 68. Fotso JC, Cleland J, Mberu B, et al. Birth spacing and child mortality: an analysis of  
44 prospective data from the Nairobi urban health and demographic surveillance system.  
45  
46  
47  
48 *Journal of biosocial science* 2013;45(6):779-98.  
49
- 50 69. Lamichhane R, Zhao Y, Paudel S, et al. Factors associated with infant mortality in Nepal:  
51 a comparative analysis of Nepal demographic and health surveys (NDHS) 2006 and  
52  
53  
54  
55 2011. *BMC public health* 2017;17(1):53.  
56
- 57 70. Sharifzadeh GR, Namakin K, Mehrjoufard H. An Epidemiological study on Infant  
58  
59  
60 Mortality and factors affecting it in Rural Areas of Birjand, Iran. 2008.

- 1  
2  
3 71. Boerma JT, Bicego GT. Preceding birth intervals and child survival: searching for pathways  
4 of influence. *Studies in family planning* 1992;23(4):243-56.  
5  
6  
7  
8 72. Dewey KG, Cohen RJ. Does birth spacing affect maternal or child nutritional status? A  
9 systematic literature review. *Maternal & child nutrition* 2007;3(3):151-73.  
10  
11  
12 73. Stuebe A. The risks of not breastfeeding for mothers and infants. *Reviews in obstetrics and*  
13 *gynecology* 2009;2(4):222.  
14  
15  
16 74. Victora CG, Bahl R, Barros AJ, et al. Breastfeeding in the 21st century: epidemiology,  
17 mechanisms, and lifelong effect. *The Lancet* 2016;387(10017):475-90.  
18  
19  
20 75. Biradar R, Patel KK, Prasad JB. Effect of birth interval and wealth on under-5 child  
21 mortality in Nigeria. *Clinical Epidemiology and Global Health* 2019;7(2):234-38.  
22  
23  
24 76. Andre FE, Booy R, Bock HL, et al. Vaccination greatly reduces disease, disability, death  
25 and inequity worldwide. *Bulletin of the World health organization* 2008;86:140-46.  
26  
27  
28 77. Innis BL, Snitbhan R, Kunasol P, et al. Protection against hepatitis A by an inactivated  
29 vaccine. *Jama* 1994;271(17):1328-34.  
30  
31  
32 78. Arevshatian L, Clements C, Lwanga S, et al. An evaluation of infant immunization in  
33 Africa: is a transformation in progress? *Bulletin of the World Health Organization*  
34 2007;85:449-57.  
35  
36  
37 79. Shrier I, Platt RW. Reducing bias through directed acyclic graphs. *BMC medical research*  
38 *methodology* 2008;8(1):70.  
39  
40  
41 80. Attia JR, Jones MP, Hure A. Deconfounding confounding part 1: traditional explanations.  
42 *The Medical Journal of Australia* 2017;206(6):244-45.  
43  
44  
45 81. Attia JR, Oldmeadow C, Holliday EG, et al. Deconfounding confounding part 2: using  
46 directed acyclic graphs (DAGs). *Medical Journal of Australia* 2017;206(11):480-83.  
47  
48  
49  
50  
51  
52  
53  
54  
55  
56  
57  
58  
59  
60

## Supplemental Material I

Women's birth interval data were collected through extracting the date of birth of their biological children data from children's birth /immunization certificate, and/or asking information regarding their children's date of birth from the women. Mothers were asked to confirm the accuracy of the information before documenting children's date of birth from children's birth/immunization certificates. This crosschecking was performed to avoid errors, since in some cases the documented birth date may represent the date when the birth was recorded, rather than the actual birth date. In the absence of children's birth certificates, information regarding children's date of birth was obtained from their mothers. Birth interval was computed in months. Further information regarding birth interval data collection can be found elsewhere



Supplemental Material II

Table 1 Variables included in Direct Acyclic Graph

| Category                            | Variables                                      | Definition                                                                                                                                                                                                                               |
|-------------------------------------|------------------------------------------------|------------------------------------------------------------------------------------------------------------------------------------------------------------------------------------------------------------------------------------------|
| Maternal background characteristics | Age at first marriage                          | The age of the woman at their first marriage, which was considered as a continuous variable                                                                                                                                              |
|                                     | Age at birth of the index Neonate/Infant/child | The age of the woman during the time she gave birth to the index neonate, which was considered as a continuous variable                                                                                                                  |
|                                     | Educational level                              | Maximum educational level (1= Uneducated, 2=Primary and 3=Secondary+ ( or Educated and Uneducated)                                                                                                                                       |
|                                     | Employment status                              | Employed/not employed based on women’s response to the question “have you been employed in the last 12 months” (1=Not Employed; 2=Employed))                                                                                             |
|                                     | Place of residence                             | The place where the women live (1=Urban; 2=Rural)                                                                                                                                                                                        |
|                                     | Region                                         | Region of residence where women live (1=Tigray, 2=Afar, 3=Amhara, 4=Oromia, 5=Somali, 6=Benishangul-Gumuz, 7=SNNPR*, 8=Gambella, 9=Harari, 10=Addis Ababa, 11=Dire Dawa)<br>*SNNPR= Southern Nations, Nationalities, and Peoples' Region |
|                                     | Number of living children                      | Total number of living children the women had ever had                                                                                                                                                                                   |
|                                     | Decision making autonomy                       | Coded as ‘yes’ if she reported being involved in all decisions regarding her own health care, major household purchases and visits to her family or relatives (1=Yes, 2=No).                                                             |
| Husband background characteristics  | Husband’s education                            | Maximum educational level of the husband (1= Uneducated, 2= Primary and 3= Secondary+)                                                                                                                                                   |
|                                     | Husband’s occupation                           |                                                                                                                                                                                                                                          |
| Household characteristics           | Access to media                                | 1=Access to media, 2= Not have access to media                                                                                                                                                                                           |
|                                     | Wealth index                                   | The wealth index provided with the dataset was used. DHS program provides a composite index of household amenities based on the principal component analysis (PCA) and classified the population into                                    |

|                                                                |                                            |                                                                                                                                                                                                                                                                                                                                                                                                                                                                                                                                                                                                                                                                                                                                |
|----------------------------------------------------------------|--------------------------------------------|--------------------------------------------------------------------------------------------------------------------------------------------------------------------------------------------------------------------------------------------------------------------------------------------------------------------------------------------------------------------------------------------------------------------------------------------------------------------------------------------------------------------------------------------------------------------------------------------------------------------------------------------------------------------------------------------------------------------------------|
|                                                                |                                            | quintiles: (1st quintile (Poorest); 2nd quintile; 3rd quintile; 4th quintile and 5th quintile (Richest). A quintile is used as a measure of its relative socioeconomic level (i.e., 1=Poorest; 2=Poorer; 3=Middle; 4=Richer; 5=Richest)                                                                                                                                                                                                                                                                                                                                                                                                                                                                                        |
| <b>Maternal health status and healthcare-related variables</b> | Antenatal care                             | Women's antenatal care utilization categorized as no visit, at least one visit, $\geq$ four visits                                                                                                                                                                                                                                                                                                                                                                                                                                                                                                                                                                                                                             |
|                                                                | Delivery care                              | Delivery assisted by physician, nurse, midwife, health officer, and health extension worker; categorized as Yes/No                                                                                                                                                                                                                                                                                                                                                                                                                                                                                                                                                                                                             |
|                                                                | Postnatal care                             | Women received check-up at least once within 48 hours after delivery by a skilled provider; categorized as Yes/No                                                                                                                                                                                                                                                                                                                                                                                                                                                                                                                                                                                                              |
|                                                                | TT immunization                            | Women received at least two doses of the immunization during pregnancy (1=Yes, 2=No)                                                                                                                                                                                                                                                                                                                                                                                                                                                                                                                                                                                                                                           |
| <b>Neonatal, infant and child characteristics</b>              | Sex                                        | 1=Male, 2=Female                                                                                                                                                                                                                                                                                                                                                                                                                                                                                                                                                                                                                                                                                                               |
|                                                                | Type of birth                              | 1=Singleton, 2 = Multiple                                                                                                                                                                                                                                                                                                                                                                                                                                                                                                                                                                                                                                                                                                      |
|                                                                | Birth weight                               | Based on mother's report that the birth weight was in one of the following categories (below average, average, above average)                                                                                                                                                                                                                                                                                                                                                                                                                                                                                                                                                                                                  |
|                                                                | Mode of delivery                           | Whether the delivery was assisted by caesarean delivery or not (1= Non-Caesarean section, 2=Caesarean section)                                                                                                                                                                                                                                                                                                                                                                                                                                                                                                                                                                                                                 |
|                                                                | Total children born before the index child | The total children born the index child was considered as a continuous variable<br><br>Total number children born before the index child was considered as a continuous variable. This was done after checking for the linearity assumption with the log-odds of short birth interval, which is a binary response variable. Multicollinearity was also checked among the exposure variables using the variance inflation factor (VIF). If the values of VIF were lower than 10, then the collinearity problem was considered to be unlikely. The VIF for birth order was 18.15 and for the total number of children born before the index child was 16.26, which indicates the presence of collinearity. Therefore, we removed |

1  
2  
3  
4  
5  
6  
7  
8  
9  
10  
11  
12  
13  
14  
15  
16  
17  
18  
19  
20  
21  
22  
23  
24  
25  
26  
27  
28  
29  
30  
31  
32  
33  
34  
35  
36  
37  
38  
39  
40  
41  
42  
43  
44  
45  
46

|                              |                       |                                                                                                                                                                                                                |
|------------------------------|-----------------------|----------------------------------------------------------------------------------------------------------------------------------------------------------------------------------------------------------------|
|                              |                       | the variable birth order from the model and the VIF became less than 3 for each variable included in the model.                                                                                                |
|                              | Birth order           | Birth order is the order number of the births from first to last. Twins are given the same birth order, but the birth order of a child born after twins will be the total number of births preceding plus one. |
|                              | Diarrhoeal Disease    | 1= Yes, 2=No                                                                                                                                                                                                   |
|                              | Fever                 | 1=Yes, 2=No                                                                                                                                                                                                    |
|                              | Respiratory infection | 1=Yes, 2=No                                                                                                                                                                                                    |
| <b>Environmental factors</b> | Source of water       | 1= Piped water, 2= Other improved (protected spring and well, and rain water), 3= Unimproved (river, pond, unprotected spring and well).                                                                       |
|                              | Latrine facility      | 1 = Improved (access to flush toilet, ventilated improved pit latrine, traditional pit latrine with a slab, or composting toilet and does not share this facility with other households), 2=unimproved.        |

### Supplemental Material III

**Table 2** Standardized difference before and after weighting the propensity score

| Variable                                                 | Standardized difference |                 |
|----------------------------------------------------------|-------------------------|-----------------|
|                                                          | Before weighting        | After weighting |
| Maternal age at the birth of the index child (in years)* | -0.384                  | 0.016           |
| Maternal education                                       |                         |                 |
| Uneducated                                               | 0.203                   | 0.000           |
| Primary                                                  | -0.130                  | -0.008          |
| Maternal occupation                                      |                         |                 |
| Not employed                                             | 0.143                   | 0.004           |
| Husband education                                        |                         |                 |
| Uneducated                                               | 0.153                   | 0.007           |
| Primary                                                  | -0.056                  | 0.005           |
| Husband occupation                                       |                         |                 |
| Not employed                                             | 0.156                   | 0.006           |
| Wealth                                                   |                         |                 |
| Poorest                                                  | 0.334                   | -0.009          |
| Poorer                                                   | -0.017                  | 0.011           |
| Middle                                                   | -0.069                  | 0.007           |
| Richer                                                   | -0.082                  | -0.002          |
| Total number of preceding child*                         | 0.211                   | -0.010          |
| Residence                                                |                         |                 |
| Urban                                                    | -0.225                  | -0.007          |
| Region                                                   |                         |                 |
| Tigray                                                   | -0.209                  | 0.004           |
| Afar                                                     | 0.198                   | 0.005           |
| Amhara                                                   | -0.286                  | 0.013           |
| Oromia                                                   | 0.024                   | 0.002           |
| Somali                                                   | 0.409                   | -0.005          |
| Benishangul-Gumuz                                        | 0.013                   | -0.007          |
| SNNPR**                                                  | -0.057                  | -0.003          |
| Gambella,                                                | -0.109                  | -0.005          |
| Harari                                                   | -0.002                  | -0.010          |
| Addis Ababa                                              | -0.170                  | 0.015           |
| Access to mass media                                     |                         |                 |
| Yes                                                      | -0.194                  | -0.002          |
| Decision making autonomy                                 |                         |                 |
| No                                                       | 0.069                   | -0.015          |

\*Maternal age at the birth of the index child (in years) and total number of the preceding child were considered as continuous variables; \*\*SNNPR= Southern Nations, Nationalities, and Peoples' Region

### Interpretation of the standardized difference

When the standardized difference is  $<0.1$ , it indicates a negligible difference in the mean or prevalence of a covariate between treatment and control groups. Therefore, the standardized difference after weighting shows the balance in covariates between the treatment and control group.

For peer review only

## STROBE 2007 (v4) Statement—Checklist of items for the study

| Section/Topic                | Item # | Recommendation                                                                                                                                                                       | Reported on page # |
|------------------------------|--------|--------------------------------------------------------------------------------------------------------------------------------------------------------------------------------------|--------------------|
| Title and abstract           | 1      | (a) Indicate the study's design with a commonly used term in the title or the abstract                                                                                               | 2                  |
|                              |        | (b) Provide in the abstract an informative and balanced summary of what was done and what was found                                                                                  | 2                  |
| <b>Introduction</b>          |        |                                                                                                                                                                                      |                    |
| Background/rationale         | 2      | Explain the scientific background and rationale for the investigation being reported                                                                                                 | 3 & 4              |
| Objectives                   | 3      | State specific objectives, including any prespecified hypotheses                                                                                                                     | 5                  |
| <b>Methods</b>               |        |                                                                                                                                                                                      |                    |
| Study design                 | 4      | Present key elements of study design early in the paper                                                                                                                              | 5                  |
| Setting                      | 5      | Describe the setting, locations, and relevant dates, including periods of recruitment, exposure, follow-up, and data collection                                                      | 5                  |
| Participants                 | 6      | (a) Give the eligibility criteria, and the sources and methods of selection of participants                                                                                          | 5                  |
| Variables                    | 7      | Clearly define all outcomes, exposures, predictors, potential confounders, and effect modifiers. Give diagnostic criteria, if applicable                                             | 5                  |
| Data sources/<br>measurement | 8*     | For each variable of interest, give sources of data and details of methods of assessment (measurement). Describe comparability of assessment methods if there is more than one group | 6                  |
| Bias                         | 9      | Describe any efforts to address potential sources of bias                                                                                                                            | 8                  |
| Study size                   | 10     | Explain how the study size was arrived at                                                                                                                                            | 5                  |
| Quantitative variables       | 11     | Explain how quantitative variables were handled in the analyses. If applicable, describe which groupings were chosen and why                                                         | 6                  |
| Statistical methods          | 12     | (a) Describe all statistical methods, including those used to control for confounding                                                                                                | 8, 9, and 10       |
|                              |        | (b) Describe any methods used to examine subgroups and interactions                                                                                                                  | 10                 |
|                              |        | (c) Explain how missing data were addressed                                                                                                                                          | N/A                |
|                              |        | (d) If applicable, describe analytical methods taking account of sampling strategy                                                                                                   | 8, 9, & 10         |
|                              |        | (e) Describe any sensitivity analyses                                                                                                                                                | 8 & 9              |
| <b>Results</b>               |        |                                                                                                                                                                                      |                    |

|                          |     |                                                                                                                                                                                                              |              |
|--------------------------|-----|--------------------------------------------------------------------------------------------------------------------------------------------------------------------------------------------------------------|--------------|
| Participants             | 13* | (a) Report numbers of individuals at each stage of study—eg numbers potentially eligible, examined for eligibility, confirmed eligible, included in the study, completing follow-up, and analysed            | 11, 12, & 13 |
|                          |     | (b) Give reasons for non-participation at each stage                                                                                                                                                         | 5            |
|                          |     | (c) Consider use of a flow diagram                                                                                                                                                                           | N/A          |
| Descriptive data         | 14* | (a) Give characteristics of study participants (eg demographic, clinical, social) and information on exposures and potential confounders                                                                     | 11, 12, & 13 |
|                          |     | (b) Indicate number of participants with missing data for each variable of interest                                                                                                                          | N/A          |
| Outcome data             | 15* | Report numbers of outcome events or summary measures                                                                                                                                                         |              |
| Main results             | 16  | (a) Give unadjusted estimates and, if applicable, confounder-adjusted estimates and their precision (eg, 95% confidence interval). Make clear which confounders were adjusted for and why they were included | 15           |
|                          |     | (b) Report category boundaries when continuous variables were categorized                                                                                                                                    | N/A          |
|                          |     | (c) If relevant, consider translating estimates of relative risk into absolute risk for a meaningful time period                                                                                             | N/A          |
| Other analyses           | 17  | Report other analyses done—eg analyses of subgroups and interactions, and sensitivity analyses                                                                                                               | 14           |
| <b>Discussion</b>        |     |                                                                                                                                                                                                              |              |
| Key results              | 18  | Summarise key results with reference to study objectives                                                                                                                                                     | 15 & 16      |
| Limitations              | 19  | Discuss limitations of the study, taking into account sources of potential bias or imprecision. Discuss both direction and magnitude of any potential bias                                                   | 17           |
| Interpretation           | 20  | Give a cautious overall interpretation of results considering objectives, limitations, multiplicity of analyses, results from similar studies, and other relevant evidence                                   | 16 & 17      |
| Generalisability         | 21  | Discuss the generalisability (external validity) of the study results                                                                                                                                        | 17 & 18      |
| <b>Other information</b> |     |                                                                                                                                                                                                              |              |
| Funding                  | 22  | Give the source of funding and the role of the funders for the present study and, if applicable, for the original study on which the present article is based                                                | 19           |

\*Give information separately for cases and controls in case-control studies and, if applicable, for exposed and unexposed groups in cohort and cross-sectional studies.

**Note:** An Explanation and Elaboration article discusses each checklist item and gives methodological background and published examples of transparent reporting. The STROBE checklist is best used in conjunction with this article (freely available on the Web sites of PLoS Medicine at <http://www.plosmedicine.org/>, Annals of Internal Medicine at <http://www.annals.org/>, and Epidemiology at <http://www.epidem.com/>). Information on the STROBE Initiative is available at [www.strobe-statement.org](http://www.strobe-statement.org).

# BMJ Open

**The effects of short birth interval on neonatal, infant and under-five child mortality in Ethiopia: a nationally representative observational study using inverse probability of treatment weighting**

|                                 |                                                                                                                                                                                                                                                                                                                                                                                                                                                                                                                                                          |
|---------------------------------|----------------------------------------------------------------------------------------------------------------------------------------------------------------------------------------------------------------------------------------------------------------------------------------------------------------------------------------------------------------------------------------------------------------------------------------------------------------------------------------------------------------------------------------------------------|
| Journal:                        | <i>BMJ Open</i>                                                                                                                                                                                                                                                                                                                                                                                                                                                                                                                                          |
| Manuscript ID                   | bmjopen-2020-047892.R1                                                                                                                                                                                                                                                                                                                                                                                                                                                                                                                                   |
| Article Type:                   | Original research                                                                                                                                                                                                                                                                                                                                                                                                                                                                                                                                        |
| Date Submitted by the Author:   | 13-May-2021                                                                                                                                                                                                                                                                                                                                                                                                                                                                                                                                              |
| Complete List of Authors:       | Shifti, Desalegn Markos; St Paul's Hospital Millennium Medical College; The University of Newcastle Faculty of Health and Medicine, Centre for Women's Health Research<br>Chojenta, Catherine; The University of Newcastle Faculty of Health and Medicine, Centre for Women's Health Research<br>Holliday, Elizabeth; The University of Newcastle Faculty of Health and Medicine, Centre for Clinical Epidemiology and Biostatistics<br>Loxton, Deborah; The University of Newcastle, Faculty of Health and Medicine, Centre for Women's Health Research |
| <b>Primary Subject Heading</b>: | Public health                                                                                                                                                                                                                                                                                                                                                                                                                                                                                                                                            |
| Secondary Subject Heading:      | Epidemiology, Obstetrics and gynaecology, Paediatrics, Reproductive medicine                                                                                                                                                                                                                                                                                                                                                                                                                                                                             |
| Keywords:                       | PUBLIC HEALTH, EPIDEMIOLOGY, Maternal medicine < OBSTETRICS, Community child health < PAEDIATRICS                                                                                                                                                                                                                                                                                                                                                                                                                                                        |
|                                 |                                                                                                                                                                                                                                                                                                                                                                                                                                                                                                                                                          |

SCHOLARONE™  
Manuscripts





I, the Submitting Author has the right to grant and does grant on behalf of all authors of the Work (as defined in the below author licence), an exclusive licence and/or a non-exclusive licence for contributions from authors who are: i) UK Crown employees; ii) where BMJ has agreed a CC-BY licence shall apply, and/or iii) in accordance with the terms applicable for US Federal Government officers or employees acting as part of their official duties; on a worldwide, perpetual, irrevocable, royalty-free basis to BMJ Publishing Group Ltd ("BMJ") its licensees and where the relevant Journal is co-owned by BMJ to the co-owners of the Journal, to publish the Work in this journal and any other BMJ products and to exploit all rights, as set out in our [licence](#).

The Submitting Author accepts and understands that any supply made under these terms is made by BMJ to the Submitting Author unless you are acting as an employee on behalf of your employer or a postgraduate student of an affiliated institution which is paying any applicable article publishing charge ("APC") for Open Access articles. Where the Submitting Author wishes to make the Work available on an Open Access basis (and intends to pay the relevant APC), the terms of reuse of such Open Access shall be governed by a Creative Commons licence – details of these licences and which [Creative Commons](#) licence will apply to this Work are set out in our licence referred to above.

Other than as permitted in any relevant BMJ Author's Self Archiving Policies, I confirm this Work has not been accepted for publication elsewhere, is not being considered for publication elsewhere and does not duplicate material already published. I confirm all authors consent to publication of this Work and authorise the granting of this licence.

1  
2  
3  
4 1 **The effects of short birth interval on neonatal, infant and**  
5  
6  
7 2 **under-five child mortality in Ethiopia: a nationally**  
8  
9  
10 3 **representative observational study using inverse**  
11  
12  
13 4 **probability of treatment weighting**  
14  
15  
16

17  
18 5 Desalegn Markos Shifti<sup>1,2,\*</sup>, Catherine Chojenta<sup>2</sup>, Elizabeth G. Holliday<sup>3</sup>, Deborah Loxton<sup>2</sup>  
19

20  
21 6 **Affiliation**  
22

23  
24 7 <sup>1</sup>Saint Paul's Hospital Millennium Medical College, Addis Ababa, Ethiopia  
25

26  
27 8 <sup>2</sup>Centre for Women's Health Research, School of Medicine and Public Health, University of  
28  
29 9 Newcastle, New South Wales, Australia  
30

31  
32 10 <sup>3</sup>Centre for Clinical Epidemiology and Biostatistics, School of Medicine and Public Health,  
33  
34 11 University of Newcastle, New South Wales, Australia  
35  
36

37  
38 12  
39  
40 13 \*Corresponding author  
41

42  
43  
44 14 [desalegnmarkos@gmail.com](mailto:desalegnmarkos@gmail.com), [desalegnmarkos.shifti@uon.edu.au](mailto:desalegnmarkos.shifti@uon.edu.au)  
45  
46  
47 15

## 17 **Abstract**

18 **Objective** To assess the effect of short birth interval on neonatal, infant, and under-five  
19 mortality in Ethiopia.

20 **Design** A nationally representative cross-sectional survey.

21 **Setting** This study used data from the Ethiopia Demographic and Health Survey (EDHS) 2016.

22 **Participants** A total of 8,448 women who had at least two live births during the five years  
23 preceding the survey were included in the analysis.

24 **Outcome measures** Neonatal mortality (death of the child within 28 days of birth), infant  
25 mortality (death between birth and 11 months), and under-five mortality (death between birth  
26 and 59 months) were the outcome variables.

27 **Methods** Weighted logistic regression analysis based on inverse probability of treatment  
28 weights (IPTW) was used to estimate exposure effects adjusted for potential confounders.

29 **Results** The adjusted odds of neonatal mortality were about 85% higher among women with  
30 short birth interval (AOR=1.85, 95% CI= 1.19, 2.89) than those without. The odds of infant  
31 mortality were two-fold higher (AOR=2.16, 95% CI= 1.49, 3.11) among women with short  
32 birth interval. The odds of under-five child mortality were also about two times higher  
33 (AOR=2.26, 95% CI= 1.60, 3.17) higher among women with short birth interval.

34 **Conclusion** Short birth interval has a significant effect on neonatal, infant, and under-five  
35 mortality in Ethiopia. Interventions targeting short birth interval are warranted to reduce  
36 neonatal, infant, and under-five mortality.

### 38 **Strengths and limitations of this study**

- 39 • The application of IPTW mimics a randomized clinical trial by matching two comparison  
40 groups using a conditional probability of receiving exposure (short birth interval in this  
41 case) given a set of covariates.
- 42 • The study has also additional strengths, such as using data from a nationally representative  
43 survey with large sample size.
- 44 • The application of DAGs, a graphical tool used to identify minimum adjustment sets, which  
45 defined the set of explanatory variables for the propensity scores model was another  
46 strength of this study.
- 47 • Due to the cross-sectional nature of the study, temporal associations between short birth  
48 interval and neonatal, infant, and under-five mortality may not be established.
- 49 • The second limitation of our study could be associated with the nonrandomized design of  
50 the study. Propensity scores based analysis, IPTW, cannot account for unknown  
51 confounders in the same way that a randomised trial can. As a result, the effect of residual  
52 confounders may not be avoided.

## 54 Introduction

55 Short birth interval, defined as a birth-to-birth interval of less than 33 months,<sup>1</sup> is a key public  
56 health problem with an estimated prevalence of 45.8% in Ethiopia.<sup>2</sup> Previous studies<sup>2-4</sup> have  
57 revealed the multifactorial nature of short birth interval, its spatial variation, and  
58 socioeconomic inequality in Ethiopia. Only about one-third of women in Ethiopia use modern  
59 contraceptives, which can prevent short birth interval.<sup>5</sup> Literature has also shown the effects of  
60 short birth interval may include, but are not limited to, preterm birth,<sup>6 7</sup> low birth weight,<sup>6 7</sup>  
61 small size for gestational age,<sup>6</sup> congenital anomalies,<sup>8 9</sup> autism,<sup>10</sup> miscarriage, preeclampsia,  
62 and premature rupture of membranes.<sup>11 12</sup>

63 Neonatal, infant, and under-five mortality are defined as the death of a child within 28 days of  
64 birth, before the age of 1 year, and before five years, respectively.<sup>5</sup> These mortality outcomes  
65 are regarded as a highly sensitive (proxy) measure of population health, a country's poverty  
66 and socioeconomic development status, and the availability and quality of health services and  
67 medical technology.<sup>13 14</sup>

68 The Sustainable Development Goal (SDG) 3.2 states that all countries should aim to reduce  
69 the neonatal mortality rate (NMR) to 12 deaths per 1000 live births or fewer, and reduce under-  
70 five mortality to 25 deaths per 1000 live births or fewer, by 2030.<sup>15</sup> The Growth and  
71 Transformation Plan of Ethiopia (GTPE) II also targets reductions in neonatal, infant, and  
72 under-five mortality rates, from 28 per 1000 live births, 44 per 1000 live births, and 64 per  
73 1000 live births in 2014/15 to 10, 20, and 30 per 1000 live births by 2019/20, respectively.<sup>16</sup>  
74 However, the 2019 Ethiopia Mini Demographic and Health Survey (EMDHS) report revealed  
75 that the neonatal, infant, and under-five mortality rates in Ethiopia were 30, 43, and 55 deaths  
76 per 1,000 live births, respectively: still much higher than GTPE targets.<sup>16 17</sup>

1  
2  
3 77 Literature from Ethiopia has shown that neonatal, infant, and under-five mortality are  
4  
5 78 associated with maternal education,<sup>18 19</sup> lack of antenatal care,<sup>20</sup> home delivery,<sup>21</sup> preterm  
6  
7 79 birth,<sup>20 22</sup> low birth weight,<sup>21 22</sup> multiple births,<sup>18 20 23 24</sup> sex of the child,<sup>18 20 23-26</sup> wealth status,<sup>27</sup>  
8  
9 80 <sup>28</sup> place of residence,<sup>21 24 25</sup> sources of drinking water,<sup>28</sup> and lack of access to an improved toilet  
10  
11 81 facility.<sup>29</sup>  
12  
13  
14

15 82 Although previous studies<sup>18-20 24 25 28-32</sup> have suggested birth interval as one factor influencing  
16  
17 83 neonatal, infant, under-five mortality, these studies have several limitations. A key limitation  
18  
19 84 is that these studies<sup>18-20 24 25 28-32</sup> did not use the World Health Organization (WHO)  
20  
21 85 recommended<sup>1</sup> definition of short birth interval. Understanding the impact of short birth  
22  
23 86 interval on neonatal, infant, and under-five mortality, using the WHO definition,<sup>1</sup> is necessary  
24  
25 87 for the formulation of valid, consistent policies and health planning strategies and interventions  
26  
27 88 to improve child health outcomes. Second, women who were not eligible to provide birth  
28  
29 89 interval information (i.e., those who had given birth only once) were included in the analysis  
30  
31 90 of some studies.<sup>20 25 29</sup> This may result in underestimation or obscuration of the true effect of  
32  
33 91 birth interval on child mortality. Third, even among studies using the same definition of short  
34  
35 92 birth interval, findings have been inconsistent.<sup>20 25</sup> One of the studies using national data<sup>20</sup> did  
36  
37 93 not control for a range of potential confounders including maternal education, wealth status,  
38  
39 94 number of children, and region of residence, even though these data were available in the  
40  
41 95 datasets used for analysis. Similarly, another previous study<sup>30</sup> that used national data did not  
42  
43 96 condition on maternal occupation, husband education, husband occupation, the total number of  
44  
45 97 preceding child, regions, access to mass media, and women's decision making autonomy. In  
46  
47 98 addition, various studies did not consider short birth interval as a potential predictor of  
48  
49 99 neonatal,<sup>22 26 27 33-36</sup> infant,<sup>19 37 38</sup> and under-five mortality<sup>39-42</sup> in their studies.  
50  
51  
52  
53  
54  
55  
56  
57  
58  
59  
60

1  
2  
3 100 Generally, the effect of short birth interval, as per the most recent WHO recommendation,<sup>1</sup> on  
4  
5 101 neonatal, infant, and under-five mortality has not been investigated in Ethiopia. Evidence  
6  
7 102 regarding the effect of short birth interval is required for informed decision making by policy  
8  
9 103 makers and health program planners. This paper aimed to assess the effect of short birth interval  
10  
11 104 on neonatal, infant, and under-five mortality using the most recent WHO definition and  
12  
13 105 adjusting for a comprehensive set of potential confounders.  
14  
15

## 16 17 106 **Methods**

### 18 19 20 107 **Study design and study area**

21  
22  
23 108 This analysis used data from the Ethiopia Demographic and Health Survey (EDHS) 2016. The  
24  
25 109 EDHS is a nationally representative cross-sectional study conducted in nine geographical  
26  
27 110 regions (Tigray, Afar, Amhara, Oromia, Somali, Benishangul-Gumuz, Southern Nations  
28  
29 111 Nationalities and Peoples (SNNP), Gambela, and Harari) and two administrative cities (Addis  
30  
31 112 Ababa and Dire Dawa). A two-stage, stratified, clustered random sampling design was  
32  
33 113 employed to collect data from women who gave birth within the five years preceding the  
34  
35 114 survey. Further descriptions of the sampling procedure for the EDHS are presented elsewhere.<sup>5</sup>  
36  
37  
38 115 A total of 8,448 women who had at least two live births during the five years preceding the  
39  
40 116 2016 survey were included in the analysis. When women had more than two births in the five  
41  
42 117 years preceding the survey, the birth interval between the most recent index child and the  
43  
44 118 immediately preceding child was considered for all the study participants.  
45  
46  
47

### 48 119 **Variables**

#### 49 50 120 **Outcome variables**

51  
52  
53 121 The outcome variables in the current study were neonatal mortality (death of the child within  
54  
55 122 28 days of birth), infant mortality (death between birth and 11 months), and under-five  
56  
57  
58  
59  
60

1  
2  
3 123 mortality (death between birth and 59 months).<sup>5 43</sup> These outcomes were coded as binary  
4  
5 124 variables (1/0).

### 8 125 **Treatment/exposure variable**

10 126 Short birth interval was the treatment variable and was defined as a birth-to-birth interval of  
11  
12  
13 127 less than 33 months as per the WHO definition.<sup>1</sup> A preceding birth interval, the amount of time  
14  
15 128 between the birth of the child under study (index child) and the immediately preceding birth,  
16  
17 129 was considered in this study. Women's birth interval data were collected through extracting  
18  
19 130 the date of birth of their biological children data from children's birth /immunization certificate,  
20  
21  
22 131 and/or asking information regarding their children's date of birth from the women. Mothers  
23  
24 132 were asked to confirm the accuracy of the information before documenting children's date of  
25  
26 133 birth from children's birth/immunization certificates. This crosschecking was performed to  
27  
28  
29 134 avoid errors, since in some cases the documented birth date may represent the date when the  
30  
31 135 birth was recorded, rather than the actual birth date. In the absence of children's birth  
32  
33 136 certificates, information regarding children's date of birth was obtained from their mothers.  
34  
35  
36 137 Further information regarding birth interval data collection is provided elsewhere.<sup>2 3 44</sup>

### 38 138 **Control variables**

40  
41 139 After reviewing relevant literature,<sup>2 18-21 23-25 28 29 39 45 46</sup> Direct Acyclic Graphs (DAGs) were  
42  
43 140 constructed using DAGitty 3.0<sup>47</sup> to identify confounders for the association between short  
44  
45 141 birth interval and neonatal, infant, and under-five child mortality. Adjustment for such  
46  
47 142 confounders is necessary to estimate the unbiased effect of SBI on neonatal, infant, and  
48  
49 143 under-five mortality (figure 1). DAG is a formal system of mapping variables and the direction  
50  
51  
52 144 of causal relationships among them.<sup>48 49</sup> This graphical representation of causal effects among  
53  
54 145 variables helps understand whether bias is potentially reduced or increased when conditioning  
55  
56  
57 146 on covariates. Moreover, it illustrates covariates that lie in the causal pathway between the  
58  
59 147 treatment and outcomes, which should not be included in the analysis as a confounder. These



1  
2  
3 148 variables are indicated by green lines in Figure 1. This is because a propensity score that  
4  
5 149 includes covariates affected by the treatment (i.e., variables on the causal pathway between  
6  
7 150 treatment and outcome) obscures part of the treatment effect that one is trying to estimate.<sup>50</sup>  
8  
9 151 Identified confounders were maternal age at the birth of the index child, maternal education,  
10  
11 152 maternal occupation, husband's education, husband's occupation, household wealth status,  
12  
13 153 survival status of the preceding child, the total number of the preceding child, place of residence  
14  
15 154 (urban/rural), regions, access to media, and decision making autonomy. A list of all variables  
16  
17 155 considered in the DAG is provided in Supplementary Material I.  
18  
19  
20  
21

22 156 A yellowish-green circle with a triangle at its centre indicates the main treatment/exposure  
23  
24 157 variable, a blue circle with a vertical bar at its centre indicates the outcome variable, light red  
25  
26 158 circles indicate ancestors of exposure and outcome (i.e., confounders). Blue circles indicate the  
27  
28 159 ancestors of the outcome variable. Green lines indicate a causal pathway. Red lines indicate  
29  
30 160 open paths by which confounding may occur; this confounding can be removed by adjusting  
31  
32 161 for one or several variables on the pathway.  
33  
34  
35

36 162 M\_age\_atBirth\_chil= Maternal age at birth of the index child; M\_Edu= Maternal education;  
37  
38 163 M\_Occu= Maternal Occupation; H\_Educ= Husband education; H\_Occup= Husband  
39  
40 164 occupation; Birth\_wt=Birth weight; Total\_Prec\_child=Total number of preceding child;  
41  
42 165 Respiratory\_infn= respiratory infection; Prev\_Chi\_Survival=Previous child survival;  
43  
44 166 Multiple\_preg= Multiple pregnancy; ANC=Antenatal care; PNC=Postnatal care;  
45  
46 167 TT\_vaccin=Tetanus toxoid vaccination status; SBI= Short birth interval; NM=Neonatal  
47  
48 168 mortality; IM=Infant mortality; U5M=Under-five mortal  
49  
50  
51

## 52 169 **Data analyses**

53  
54  
55 170 Participants' characteristics were described using frequency with percent. P-values were  
56  
57 171 calculated using Pearson's chi-squared test. Given that the outcomes (i.e., neonatal, infant, and  
58  
59 172 under-five mortality) were relatively infrequent, the unbiased effect of short birth interval on  
60

1  
2  
3 173 each outcome was estimated using propensity scores (PS) with a stabilized method of inverse  
4  
5 174 probability of treatment weighting (IPTW). A previous study<sup>51</sup> has shown that IPTW with  
6  
7 175 stabilized weights preserves the sample size of the original data, provides an appropriate  
8  
9 176 estimation of the variance of the main effect, and maintains an appropriate type I error rate.  
10  
11 177 The other methods, such as IPTW with normalized weight and greedy algorithm with 1:1  
12  
13 178 matching methods, are discussed elsewhere.<sup>52-54</sup> A propensity score is defined as the  
14  
15 179 probability of treatment assignment given observed baseline covariates (described in  
16  
17 180 Supplementary Material II).<sup>54</sup> Propensity scores are used to estimate treatment effects on  
18  
19 181 outcomes using observational data when confounding bias due to non-random treatment  
20  
21 182 assignment is likely.<sup>50</sup> Inverse probability of treatment weighting weights the entire study  
22  
23 183 sample by the inverse of the propensity score;<sup>55</sup> a differential amount of information is used  
24  
25 184 from each participant, depending on their conditional probability of receiving treatment. This  
26  
27 185 means observations are less likely to be lost than when using matching for confounder  
28  
29 186 adjustment.<sup>56 57</sup> Propensity scores are a robust alternative to covariate adjustment when the  
30  
31 187 outcome variable is rare, resulting in data sparsity and estimation issues in multivariable  
32  
33 188 models.<sup>57</sup> In this study, the weighted prevalence of the outcome variables of neonatal, infant,  
34  
35 189 and under-five mortality were 2.9% (95% CI: 2.39, 3.61), 4.8% (95% CI: 4.11, 5.58), and 5.5%  
36  
37 190 (95% CI: 4.73, 6.44), respectively.

38  
39 191 The analysis procedure was as follows. First, the propensity score was estimated using a  
40  
41 192 logistic regression model in which treatment assignment (short birth interval vs. non-short birth  
42  
43 193 interval) was regressed on the 11 covariates identified using the DAG. The balance of measured  
44  
45 194 covariates/confounders was then assessed across treatment groups (i.e., women with short birth  
46  
47 195 interval) and comparison groups (i.e., women with non-short birth interval) before and after  
48  
49 196 weighting, by computing standardized differences (Supplementary Material II).<sup>57 58</sup> For a  
50  
51 197 continuous covariate, the standardized difference<sup>58 59</sup> is defined as:  
52  
53  
54  
55  
56  
57  
58  
59  
60

$$d = \frac{(\bar{x}_{treatment} - \bar{x}_{control})}{\sqrt{\frac{s_{treatment}^2 + s_{control}^2}{2}}}$$

198 where  $\bar{x}_{treatment}$  and  $\bar{x}_{control}$  denote the sample mean of the covariate in treated and untreated  
 199 subjects, respectively and  $s_{treatment}^2$  and  $s_{control}^2$  denote the corresponding sample variances of  
 200 the covariate. The standardized difference<sup>58 59</sup> for a dichotomous variable is given as:

$$d = \frac{(\hat{p}_{treatment} - \hat{p}_{control})}{\sqrt{\frac{\hat{p}_{treatment}(1 - \hat{p}_{treatment}) + \hat{p}_{control}(1 - \hat{p}_{control})}{2}}}$$

201 where  $\hat{p}_{treatment}$  and  $\hat{p}_{control}$  denote the prevalence of the dichotomous variable in treated  
 202 and untreated subjects, respectively.

203 A standard difference less than 0.1 has been suggested as indicating a negligible difference in  
 204 the mean or prevalence of a covariate between treatment and control groups and was used  
 205 here.<sup>58</sup> In addition, kernel densities were plotted to graphically demonstrate the propensity  
 206 score balance in the treatment group (i.e., women with short birth interval) and control groups  
 207 (women with non-short birth interval). Balance in propensity scores was considered to be  
 208 achieved when the kernel density line for the treatment group and control group lay closer  
 209 together.<sup>60</sup> The inverse probability of treatment weights was then calculated as 1/PS for those  
 210 exposed to short birth interval and 1/(1 - PS) for those who were not. The sample was then  
 211 reweighted by the IPTW and the balance of the covariates checked in the reweighted  
 212 sample.<sup>50 61</sup> Stabilization of weights was made to preserve the sample size of the original  
 213 data, reduce the effect of weights of either treated subjects with low propensity scores or  
 214 untreated subjects with high propensity scores, and provides appropriate improve the  
 215 estimation of variance estimates and confidence intervals for the treatment effect.<sup>51</sup> Since  
 216 the EDHS employed a two-stage, stratified, clustered random sampling, which is a complex  
 217 sampling procedure, sampling weights were also used to adjust for the non-proportional

1  
2  
3 218 allocation of sample participants to different regions, including urban and rural areas, and  
4  
5 219 consider the possible differences in response rates.<sup>5</sup> Finally, a weighted logistic regression was  
6  
7 220 fit to estimate the effect of the treatment (short birth interval) on each outcome variable  
8  
9 221 (neonatal, infant, and under-five mortality). Estimation of the treatment effect on outcome  
10  
11 222 variables in the final model used the grand weight, which was formed as the product of the  
12  
13 223 survey weight and the stabilized weight. Literature has shown that combining a propensity  
14  
15 224 score method and survey weighting is necessary to estimate unbiased treatment effects which  
16  
17 225 are generalizable to the original survey target population.<sup>62</sup> The treatment effect on the outcome  
18  
19 226 variables was expressed as adjusted odds ratios (AORs) with a 95% confidence interval (CI).  
20  
21 227 Statistical analysis was performed using Stata version 14 statistical software (*StataCorp. Stata*  
22  
23 228 *Statistical Software: Release 14. College Station, TX: StataCorp LP. 2015*). Figure 2 presents  
24  
25 229 a schematic summary of the overall analysis procedure.

## 30 230 **Patient and public involvement**

31 231 Patients and/or the general public were not involved in the design, or conduct, or drafting of  
32  
33 232 this secondary analysis.

## 34 233 **Results**

### 35 234 **Respondents' characteristics**

36 235 Table 1 illustrates the baseline characteristics of the study participants. The occurrence of  
37  
38 236 neonatal mortality differed with maternal age at birth, with mortality rates being higher among  
39  
40 237 mothers aged  $\geq 35$  ( $p=0.021$ ). Neonatal mortality was also higher in rural than in urban areas  
41  
42 238 ( $p=0.004$ ). Similarly, infant mortality and under-five mortality were somewhat higher in rural  
43  
44 239 areas ( $p<0.001$ ). Under-five mortality was higher among uneducated mothers ( $p=0.027$ ) and in  
45  
46 240 mothers without access to mass media ( $p=0.043$ ). Mortality at all ages was higher among  
47  
48 241 infants with at least five siblings ( $p<0.0001$ ). Both infant and under-five mortality were slightly  
49  
50 242 higher among women from the richer household

243 **Table 1** The weighted distribution of neonatal, infant, and under-five child mortality by background characteristics, EDHS 2016

| Variable                                                | Neonatal Mortality |            | P-value | Infant Mortality |            | P-value | Under-five Mortality |            | P-value |
|---------------------------------------------------------|--------------------|------------|---------|------------------|------------|---------|----------------------|------------|---------|
|                                                         | No (%)             | Yes (%)    |         | No (%)           | Yes (%)    |         | No (%)               | Yes (%)    |         |
| Maternal age at the birth of the index child (in years) |                    |            |         |                  |            |         |                      |            |         |
| ≤19                                                     | 291 (3.2)          | 17 (5.8)   | 0.021   | 283 (3.1)        | 25 (6.5)   | 0.065   | 280 (3.1)            | 28 (6.0)   | 0.068   |
| 20-24                                                   | 1950 (23.4)        | 52 (18.8)  |         | 1896 (23.2)      | 106 (23.7) |         | 1877 (23.3)          | 125 (23.0) |         |
| 25-29                                                   | 2587 (30.8)        | 67 (26.0)  |         | 2536 (30.8)      | 118 (27.6) |         | 2516 (30.8)          | 138 (27.4) |         |
| 30-34                                                   | 1836 (22.7)        | 59 (22.6)  |         | 1802 (22.9)      | 93 (21.0)  |         | 1781 (22.7)          | 114 (22.9) |         |
| ≥35                                                     | 1533 (19.9)        | 56 (26.8)  |         | 1515 (20.0)      | 74 (21.2)  |         | 1500 (20.1)          | 89 (20.7)  |         |
| Maternal education                                      |                    |            |         |                  |            |         |                      |            |         |
| Uneducated                                              | 5890 (73.9)        | 182 (75.0) | 0.859   | 5759 (73.8)      | 313 (75.9) | 0.157   | 5694 (73.9)          | 378 (75.5) | 0.027   |
| Primary                                                 | 1744 (22.0)        | 54 (19.7)  |         | 1715 (22.0)      | 83 (20.8)  |         | 1704 (22.0)          | 94 (21.1)  |         |
| Secondary+                                              | 563 (4.1)          | 15 (5.3)   |         | 558 (4.2)        | 20 (3.3)   |         | 556 (4.1)            | 22 (3.4)   |         |
| Maternal occupation                                     |                    |            |         |                  |            |         |                      |            |         |
| Not employed                                            | 5935 (72.9)        | 178 (74.6) | 0.604   | 5807 (72.9)      | 306 (73.2) | 0.575   | 5747 (72.9)          | 366 (73.6) | 0.376   |
| Employed                                                | 2267 (27.1)        | 73 (25.4)  |         | 2225 (27.1)      | 110 (26.8) |         | 2207 (27.1)          | 128 (26.4) |         |
| Husband education                                       |                    |            |         |                  |            |         |                      |            |         |
| Uneducated                                              | 4186 (49.9)        | 145 (53.2) | 0.092   | 4104 (50.0)      | 227 (50.1) | 0.346   | 4057 (50.0)          | 274 (49.0) | 0.154   |
| Primary                                                 | 2482 (37.3)        | 69 (34.6)  |         | 2437 (37.3)      | 114 (36.2) |         | 2416 (37.3)          | 135 (37.1) |         |
| Secondary+                                              | 1529 (12.8)        | 37 (12.2)  |         | 1491 (12.7)      | 75 (13.7)  |         | 1481 (12.7)          | 85 (13.9)  |         |
| Husband occupation                                      |                    |            |         |                  |            |         |                      |            |         |
| Not employed                                            | 873 (7.7)          | 22 (6.6)   | 0.339   | 846 (7.6)        | 49 (7.7)   | 0.421   | 838 (7.6)            | 57 (7.4)   | 0.482   |
| Employed                                                | 7324 (92.3)        | 229 (93.4) |         | 7186 (92.4)      | 367 (92.3) |         | 7116 (92.4)          | 437 (92.6) |         |
| Wealth                                                  |                    |            |         |                  |            |         |                      |            |         |
| Poorest                                                 | 3238 (25.4)        | 109 (15.6) | 0.248   | 3163 (25.3)      | 184 (21.5) | 0.015   | 3118 (25.3)          | 229 (22.2) | <0.001  |
| Poorer                                                  | 1430 (23.4)        | 48 (22.5)  |         | 1400 (23.4)      | 78 (22.2)  |         | 1390 (23.5)          | 88 (21.3)  |         |
| Middle                                                  | 1167 (21.1)        | 36 (22.8)  |         | 1147 (21.3)      | 56 (20.0)  |         | 1136 (21.2)          | 67 (20.7)  |         |
| Richer                                                  | 1025 (17.8)        | 30 (24.8)  |         | 1000 (17.7)      | 55 (23.3)  |         | 993 (17.6)           | 62 (23.7)  |         |
| Richest                                                 | 1337 (12.3)        | 28 (14.3)  |         | 1322 (12.3)      | 43 (13.0)  |         | 1317 (12.3)          | 48 (12.1)  |         |

|    |                           |             |            |        |             |            |        |             |            |        |
|----|---------------------------|-------------|------------|--------|-------------|------------|--------|-------------|------------|--------|
| 1  |                           |             |            |        |             |            |        |             |            |        |
| 2  |                           |             |            |        |             |            |        |             |            |        |
| 3  |                           |             |            |        |             |            |        |             |            |        |
| 4  | Total number of preceding |             |            |        |             |            |        |             |            |        |
| 5  | child                     |             |            |        |             |            |        |             |            |        |
| 6  | ≤2                        | 2627 (31.0) | 57 (27.0)  | <0.001 | 2591 (31.0) | 93 (27.1)  | <0.001 | 2575 (31.1) | 109 (26.4) | <0.001 |
| 7  | 3-4                       | 2561 (30.6) | 77 (22.0)  |        | 2505 (30.7) | 133 (23.6) |        | 2482 (30.7) | 156 (24.6) |        |
| 8  | ≥5                        | 3009 (38.4) | 117 (50.9) |        | 2936 (38.2) | 190 (49.3) |        | 2897 (38.2) | 229 (49.0) |        |
| 9  | Residence                 |             |            |        |             |            |        |             |            |        |
| 10 | Urban                     | 1264 (8.8)  | 22 (12.0)  | 0.004  | 1251 (8.9)  | 35 (8.7)   | <0.001 | 1248 (9.0)  | 38 (7.7)   | <0.001 |
| 11 | Rural                     | 6933 (91.2) | 229 (88.0) |        | 6781 (91.1) | 381 (91.3) |        | 6706 (91.0) | 456 (92.3) |        |
| 12 |                           |             |            |        |             |            |        |             |            |        |
| 13 | Region                    |             |            |        |             |            |        |             |            |        |
| 14 | Tigray                    | 765 (6.0)   | 23 (6.1)   | 0.516  | 762 (6.1)   | 26 (4.1)   | 0.145  | 752 (6.1)   | 36 (5.3)   | 0.039  |
| 15 | Afar                      | 808 (1.0)   | 20 (0.7)   |        | 779 (1.0)   | 49 (1.2)   |        | 762 (1.0)   | 66 (1.4)   |        |
| 16 | Amhara                    | 774 (18.7)  | 26 (22.2)  |        | 765 (18.8)  | 35 (17.9)  |        | 761 (18.9)  | 39 (17.2)  |        |
| 17 | Oromia                    | 1270 (44.7) | 37 (45.5)  |        | 1245 (44.6) | 62 (47.9)  |        | 1235 (44.6) | 72 (47.1)  |        |
| 18 | Somali                    | 1231(5.0)   | 52 (6.3)   |        | 1210 (4.9)  | 73 (5.4)   |        | 1203 (4.9)  | 80 (5.1)   |        |
| 19 | Benishangul-Gumuz         | 711 (1.1)   | 24 (1.0)   |        | 690 (1.1)   | 45 (1.3)   |        | 682 (1.1)   | 53 (1.4)   |        |
| 20 | SNNPR***                  | 1021 (21.2) | 23 (16.0)  |        | 995 (21.1)  | 49 (20.4)  |        | 987 (21.1)  | 57 (20.9)  |        |
| 21 | Gambella,                 | 541 (0.2)   | 16 (0.2)   |        | 531 (0.2)   | 26 (0.2)   |        | 522 (0.2)   | 35 (0.2)   |        |
| 22 | Harari                    | 443 (0.2)   | 13 (0.2)   |        | 429 (0.2)   | 27 (0.2)   |        | 427 (0.2)   | 29 (0.2)   |        |
| 23 | Addis Ababa               | 246 (1.5)   | 6 (1.2)    |        | 245 (1.5)   | 7 (1.0)    |        | 245 (1.5)   | 7 (0.8)    |        |
| 24 | Dire Dawa                 | 387 (0.4)   | 11 (0.4)   |        | 381(0.4)    | 17 (0.4)   |        | 378 (0.4)   | 20 (0.4)   |        |
| 25 |                           |             |            |        |             |            |        |             |            |        |
| 26 | Access to mass media      |             |            |        |             |            |        |             |            |        |
| 27 | Yes                       | 1408 (15.8) | 36 (23.2)  | 0.240  | 1383 (15.9) | 61 (20.2)  | 0.177  | 1376 (15.9) | 68 (19.0)  | 0.043  |
| 28 | No                        | 6789 (84.2) | 215 (76.8) |        | 6649 (84.1) | 355 (79.8) |        | 6578 (84.1) | 426 (81.0) |        |
| 29 |                           |             |            |        |             |            |        |             |            |        |
| 30 | Decision making autonomy  |             |            |        |             |            |        |             |            |        |
| 31 | Yes                       | 6014 (77.7) | 179 (74.9) | 0.469  | 5898 (77.8) | 295 (73.8) | 0.258  | 5848        | 345        | 0.072  |
| 32 | No                        | 2183 (22.3) | 72 (25.1)  |        | 2134 (22.2) | 121 (26.2) |        | 2106        | 149        |        |
| 33 |                           |             |            |        |             |            |        |             |            |        |
| 34 |                           |             |            |        |             |            |        |             |            |        |

244 \*\*\*SNNPR= Southern Nations, Nationalities, and Peoples' Region; EDHS= Ethiopia Demographic and Health Survey

## 245 **Balance diagnostics**

## 246 **Propensity score balance**

247 Figure 3 presents the density plot of women in the treatment group (dashed lines) and control  
248 group (solid lines) before and after weighting. It reveals that an adequate balance of the  
249 propensity score distribution between the treatment groups after weighting (Figure 3).

## 250 **Covariate balance**

251 After weighting adjustment, standardized differences of covariates were all less than 0.1 (10%),  
252 showing comparability between women with and without short birth interval  
253 (Supplementary Material II).

## 254 **Treatment effect estimation**

255 The prevalence of short birth interval in Ethiopia was 45.8% (95% CI: 42.91–48.62). Table 2  
256 presents the estimated effects of short birth interval on neonatal, infant, and under-five  
257 mortality. The adjusted estimated odds of neonatal mortality were 85% higher among women  
258 who experienced short birth interval (AOR=1.85, 95% CI=1.19, 2.89) than those who did not.  
259 Similarly, the odds of infant mortality were two times higher (AOR=2.16, 95% CI=1.49, 3.11)  
260 among women who experienced short birth interval compared with women who did not. The  
261 odds of under-five child mortality were two times (AOR=2.26, 95% CI= 1.60, 3.17) higher  
262 among women who were exposed to short birth interval compared with women who were not.

263

**Table 2** The effect of short birth interval on neonatal, infant, and under-five mortality in Ethiopia, EDHS 2016

| Treatment variable   | Neonatal mortality   |            | AOR (95% CI)      |
|----------------------|----------------------|------------|-------------------|
|                      | No (%)*              | Yes (%)*   |                   |
| Short birth interval |                      |            |                   |
| No                   | 4166 (54.5)          | 95 (46.1)  | Ref               |
| Yes                  | 4031 (45.5)          | 156 (53.9) | 1.85 (1.19, 2.89) |
|                      | Infant mortality     |            |                   |
| Short birth interval | No (%)               | Yes (%)    |                   |
| No                   | 4126 (54.9)          | 135 (40.5) | Ref               |
| Yes                  | 3906 (45.1)          | 281 (59.5) | 2.16 (1.49, 3.11) |
|                      | Under-Five mortality |            |                   |
| Short Birth interval | No (%)               | Yes (%)    |                   |
| No                   | 4099 (55.1)          | 162 (39.3) | Ref               |
| Yes                  | 3855 (44.9)          | 332 (60.7) | 2.26 (1.60, 3.17) |

EDHS= Ethiopia Demographic and Health Survey; AOR= Adjusted Odds Ratio; CI= Confidence Interval; Ref= reference group; (%)\*=percentage are weighted

## Discussion

To our knowledge, this study provides the first comprehensive assessment of the effect of short birth interval on neonatal, infant, and under-five mortality using the WHO recommendation to define short birth interval and applying rigorous analytical techniques to adjust for potential confounders. This study provides evidence that short birth interval is associated with neonatal, infant, and under-five mortality in Ethiopia. These findings will help policy makers and program planners formulate targeted interventions to increase birth intervals and contribute to achieving the GTPE and SDGs target of reducing neonatal, infant, and under-five mortality.<sup>16 15</sup>

In this current study, short birth interval was found to be associated with higher odds of neonatal mortality. This finding is consistent with evidence from the previous studies<sup>23 25 63-66</sup> which have shown a higher risk of neonatal mortality among women with a short birth interval. However, the definition of short birth interval (i.e., <33 months) used in the current



1  
2  
3 282 study was in line with the WHO definition and longer than those used in previous studies (i.e.,  
4  
5 283 ranges from <18 to 24 months). Short birth interval could result in adverse neonatal child health  
6  
7  
8 284 outcomes, such as death, by causing maternal nutritional depletion, specifically folate  
9  
10 285 depletion.<sup>67 68</sup> The maternal nutritional depletion hypothesis states that a short birth-to-  
11  
12 286 pregnancy/birth interval worsens the mother's nutritional status because of inadequate time to  
13  
14  
15 287 recover from the physiological stresses of the subsequent pregnancy.<sup>69</sup> This may compromise  
16  
17 288 maternal nutritional status and ability to support fetal growth, which could result in fetal  
18  
19 289 malnutrition and increased risk of infection and death during childhood.<sup>67</sup> Women with short  
20  
21 290 birth interval may also be less likely to attend postnatal care, which is vital for early detection  
22  
23  
24 291 and treatment of neonatal and maternal health problems. Evidence has shown that the majority  
25  
26 292 of mothers and newborns in low- and middle-income countries do not receive optimal postnatal  
27  
28  
29 293 care<sup>70</sup>, yet close to half of the newborn deaths occurred within the first 24 hours after birth, a  
30  
31 294 critical time where mothers and their babies should get their first postnatal care.<sup>71</sup>  
32  
33  
34 295 Our study found that infant mortality was two times higher among women who experienced  
35  
36 296 short birth interval compared with women who did not. Our finding was consistent with  
37  
38 297 evidence from Ethiopia,<sup>18 32</sup> Kenya,<sup>72 73</sup> Nepal,<sup>74</sup> and Iran<sup>75</sup> although the cut-off point for  
39  
40  
41 298 short birth interval in the current study was longer than the previous studies. The  
42  
43 299 abovementioned previous studies also documented that the risk of infant mortality was  
44  
45 300 higher among women who experienced short birth interval compared with women who did  
46  
47  
48 301 not. One of the possible reasons for the effect of short birth interval on infant mortality could  
49  
50 302 be low maternal motivation to breastfeed (for example, if the pregnancy was unintended).<sup>76</sup>  
51  
52 303 Maternal perception of being undernourished due to a short birth interval may also influence  
53  
54 304 her infant feeding choices, such as the duration and intensity of breastfeeding and  
55  
56  
57 305 supplemental feeding of the infant. This could in turn affect infants' nutritional status, their  
58  
59  
60

1  
2  
3 306 resistance to infection, and may expose them to death.<sup>76-79</sup> The abovementioned links  
4  
5 307 between short birth interval and neonatal mortality also apply to infant mortality.  
6  
7

8 308 Short birth interval doubled the odds of under-five mortality compared with non-short birth  
9  
10 309 interval. Despite not using the WHO recommendation<sup>1</sup> of less than 33 months to define short  
11  
12 310 birth interval, the existing literature<sup>24 30 63 64 80</sup> also supported our finding. The likely mechanism  
13  
14 311 through which short birth interval affects under-five mortality could be competition between  
15  
16 312 closely spaced siblings for limited household resources, maternal attention, and cross-  
17  
18 313 infection.<sup>76</sup> Moreover, children born within a short birth interval may not receive their  
19  
20 314 vaccination at all or complete their booster series, which is one of the risk factors that  
21  
22 315 exposed children to the infectious disease and its associated death.<sup>81-83</sup> Women with short  
23  
24 316 birth interval could be burdened with caring for highly dependent children<sup>77</sup> and other  
25  
26 317 domestic activities. As a result, they may lack the time and motivation to take children to  
27  
28 318 the health facility for vaccination and other services.  
29  
30  
31  
32  
33

34 319 The results of this study need to be interpreted within the limitations of the observational  
35  
36 320 study design. Due to the cross-sectional nature of the study, temporal associations between  
37  
38 321 short birth interval and neonatal, infant, and under-five mortality may not be established.  
39  
40 322 The second limitation of our study could be associated with the nonrandomized design of  
41  
42 323 the study. Propensity scores based analysis, IPTW, cannot account for unknown confounders  
43  
44 324 in the same way that a randomised trial can. As a result, the effect of residual confounders  
45  
46 325 may not be avoided. However, the application of IPTW mimics a randomized clinical trial  
47  
48 326 by matching two comparison groups using a conditional probability of receiving exposure  
49  
50 327 (short birth interval in this case) given a set of covariates. The study has also additional  
51  
52 328 strengths, such as using data from a nationally representative survey with large sample size.  
53  
54 329 The application of DAGs,<sup>48 49 84</sup> a graphical tool used to identify minimum adjustment sets,  
55  
56  
57  
58  
59  
60

1  
2  
3 330 which defined the set of explanatory variables for the propensity scores model was another  
4  
5 331 strength of this study.  
6  
7

## 8 332 **Conclusion**

9  
10  
11  
12 333 This study provides evidence that short birth interval has a significant effect on neonatal,  
13  
14 334 infant, and under-five mortality in Ethiopia. Interventions aiming to reduce neonatal, infant,  
15  
16 335 and under-five mortality in Ethiopia should target the prevention of short birth interval.  
17  
18 336 These could be achieved through creating awareness on the optimum birth interval and the  
19  
20 337 negative impacts of shorter birth intervals on the health of children. Further expanding the  
21  
22 338 availability and accessibility of family planning services also help women achieve optimum  
23  
24 339 birth interval. Birth interval counseling as per the WHO recommendation should be  
25  
26 340 integrated into the maternal and child health services as part of the child survival  
27  
28 341 intervention.  
29  
30  
31  
32

## 33 342 **Author affiliations**

34  
35  
36  
37 343 <sup>1</sup> Saint Paul's Hospital Millennium Medical College, Addis Ababa, Ethiopia

38  
39  
40 344 <sup>2</sup>Centre for Women's Health Research, School of Medicine and Public Health, University of  
41  
42  
43 345 Newcastle, Newcastle, New South Wales, Australia

44  
45  
46 346 <sup>3</sup>Centre for Clinical Epidemiology and Biostatistics, School of Medicine and Public Health,  
47  
48 347 University of Newcastle, Newcastle, New South Wales, Australia  
49  
50

## 51 348 **Acknowledgment**

52  
53  
54  
55  
56 349 We are grateful to The DHS Program for allowing us to use the Ethiopia Demographic and  
57  
58 350 Health Survey (EDHS) data for further analysis.  
59  
60

## 351 **Contributors**

352 All authors (DMS, CC, EGH, and DL) contributed to the design of the study and the  
353 interpretation of data. DM performed the data analysis and drafted the manuscript. All  
354 authors (DMS, CC, EGH, and DL) read, critically revised, and approved the final  
355 manuscript.

## 356 **Funding**

357 The authors received no specific funding for this work.

## 358 **Competing interests**

359 The authors declare that they have no competing interests.

## 360 **Ethics approval**

361 The 2016 EDHS was approved by the National Research Ethics Review Committee of  
362 Ethiopia (NRERC) and ICF Macro International. Permission from The DHS Program was  
363 obtained to use the 2016 EDHS data for further analysis. This analysis was also approved  
364 by The University of Newcastle Human Research Ethics Committee (H-2018-0332).

## 365 **Consent for publication**

366 Not required

## 367 **Provenance and peer review**

368 Not commissioned; externally peer reviewed.

## 369 **Data availability statement**

1  
2  
3 370 The dataset is available from The DHS Program repository at the following link:  
4  
5 371 [https://www.dhsprogram.com/data/dataset/Ethiopia\\_Standard-DHS\\_2016.cfm?flag=0](https://www.dhsprogram.com/data/dataset/Ethiopia_Standard-DHS_2016.cfm?flag=0).  
6  
7  
8

## 9 372 **References**

- 10  
11  
12 373 1. World Health Organization. Report of a WHO Technical Consultation on Birth Spacing.  
13  
14  
15 374 *Geneva, Switzerland* 13-15 June 2005.
- 16  
17 375 2. Shifti DM, Chojenta C, G. Holliday E, et al. Individual and community level determinants  
18  
19 376 of short birth interval in Ethiopia: A multilevel analysis. *PloS one*  
20  
21 377 2020;15(1):e0227798.
- 22  
23  
24 378 3. Shifti DM, Chojenta C, Holliday EG, et al. Application of geographically weighted  
25  
26 379 regression analysis to assess predictors of short birth interval hot spots in Ethiopia. *PloS*  
27  
28 380 *one* 2020;15(5):e0233790.
- 29  
30  
31 381 4. Shifti DM, Chojenta C, Holliday EG, et al. Socioeconomic inequality in short birth interval  
32  
33 382 in Ethiopia: a decomposition analysis. *BMC public health* 2020;20(1):1-13.
- 34  
35 383 5. Central Statistical Agency (CSA) [Ethiopia] and ICF. Ethiopia Demographic and Health  
36  
37 384 Survey 2016. *Addis Ababa, Ethiopia, and Rockville, Maryland, USA: CSA and ICF*  
38  
39 385 2016.
- 40  
41  
42 386 6. Grisaru-Granovsky S, Gordon E-S, Haklai Z, et al. Effect of interpregnancy interval on  
43  
44 387 adverse perinatal outcomes-a national study. *Contraception* 2009;80(6):512-18.
- 45  
46  
47 388 7. Adam I, Ismail MH, Nasr AM, et al. Low birth weight, preterm birth and short  
48  
49 389 interpregnancy interval in Sudan. *The Journal of Maternal-Fetal & Neonatal Medicine*  
50  
51 390 2009;22(11):1068-71.
- 52  
53  
54 391 8. Chen I, Jhangri GS, Chandra S. Relationship between interpregnancy interval and congenital  
55  
56 392 anomalies. *American journal of obstetrics and gynecology* 2014;210(6):564. e1-8.  
57  
58  
59  
60

- 1  
2  
3 393 9. Kwon S, Lazo-Escalante M, Villaran M, et al. Relationship between interpregnancy interval  
4  
5 394 and birth defects in Washington State. *Journal of Perinatology* 2012;32(1):45.  
6  
7  
8 395 10. Cheslack-Postava K, Liu K, Bearman PS. Closely spaced pregnancies are associated with  
9  
10 396 increased odds of autism in California sibling births. *Pediatrics* 2011;127:246-53.  
11  
12 397 11. DaVanzo J, Razzaque A, Rahman M, et al. The effects of birth spacing on infant and child  
13  
14 398 mortality, pregnancy outcomes, and maternal morbidity and mortality in Matlab,  
15  
16 399 Bangladesh. *Technical Consultation and Review of the Scientific Evidence for Birth*  
17  
18 400 *Spacing* 2004.  
19  
20  
21 401 12. DaVanzo J, Hale L, Razzaque A, et al. Effects of interpregnancy interval and outcome of  
22  
23 402 the preceding pregnancy on pregnancy outcomes in Matlab, Bangladesh. *BJOG: An*  
24  
25 403 *International Journal of Obstetrics & Gynaecology* 2007;114(9):1079-87.  
26  
27  
28 404 13. Gonzalez RM, Gilleskie D. Infant mortality rate as a measure of a country's health: a robust  
29  
30 405 method to improve reliability and comparability. *Demography* 2017;54(2):701-20.  
31  
32  
33 406 14. Reidpath DD, Allotey P. Infant mortality rate as an indicator of population health. *Journal*  
34  
35 407 *of Epidemiology & Community Health* 2003;57(5):344-46.  
36  
37  
38 408 15. UN. Transforming our World: The 2030 Agenda For Sustainable Development Goal  
39  
40 409 (A/RES/70/1). 2015.  
41  
42 410 16. National Planning Commission. Federal Democratic Republic of Ethiopia: Growth and  
43  
44 411 Transformation Plan II (GTP II) (2015/16-2019/20). *Addis Ababa, Ethiopia* 2016.  
45  
46  
47 412 17. Ethiopian Public Health Institute (EPHI) [Ethiopia] and ICF. Ethiopia Mini Demographic  
48  
49 413 and Health Survey 2019: Key Indicators. *Rockville, Maryland, USA: EPHI and ICF*  
50  
51 414 2019.  
52  
53  
54 415 18. Abate MG, Angaw DA, Shaweno T. Proximate determinants of infant mortality in Ethiopia,  
55  
56 416 2016 Ethiopian demographic and health surveys: results from a survival analysis.  
57  
58 417 *Archives of Public Health* 2020;78(1):1-10.  
59  
60

- 1  
2  
3 418 19. Weldearegawi B, Melaku YA, Abera SF, et al. Infant mortality and causes of infant deaths  
4  
5 419 in rural Ethiopia: a population-based cohort of 3684 births. *BMC public health*  
6  
7 420 2015;15(1):770.  
8  
9  
10 421 20. Wolde HF, Gonete KA, Akalu TY, et al. Factors affecting neonatal mortality in the general  
11  
12 422 population: evidence from the 2016 Ethiopian Demographic and Health Survey  
13  
14 423 (EDHS)—multilevel analysis. *BMC research notes* 2019;12(1):610.  
15  
16  
17 424 21. Roro EM, Tumtu MI, Gebre DS. Predictors, causes, and trends of neonatal mortality at  
18  
19 425 Nekemte Referral Hospital, east Wollega Zone, western Ethiopia (2010–2014).  
20  
21 426 Retrospective cohort study. *PloS one* 2019;14(10):e0221513.  
22  
23  
24 427 22. Seid SS, Ibro SA, Ahmed AA, et al. Causes and factors associated with neonatal mortality  
25  
26 428 in neonatal intensive care unit (NICU) of Jimma University medical center, Jimma,  
27  
28 429 south West Ethiopia. *Pediatric health, medicine and therapeutics* 2019;10:39.  
29  
30  
31 430 23. Wakgari N, Wencheko E. Risk factors of neonatal mortality in Ethiopia. *Ethiopian Journal*  
32  
33 431 *of Health Development* 2013;27(3):192-99.  
34  
35  
36 432 24. Fikru C, Getnet M, Shaweno T. Proximate Determinants of Under-Five Mortality in  
37  
38 433 Ethiopia: Using 2016 Nationwide Survey Data. *Pediatric Health, Medicine and*  
39  
40 434 *Therapeutics* 2019;10:169.  
41  
42  
43 435 25. Mekonnen Y, Tensou B, Telake DS, et al. Neonatal mortality in Ethiopia: trends and  
44  
45 436 determinants. *BMC public health* 2013;13(1):483.  
46  
47  
48 437 26. Limaso AA, Dangisso MH, Hibstu DT. Neonatal survival and determinants of mortality in  
49  
50 438 Aroresa district, Southern Ethiopia: a prospective cohort study. *BMC pediatrics*  
51  
52 439 2020;20(1):33.  
53  
54 440 27. Yaya Y, Eide KT, Norheim OF, et al. Maternal and neonatal mortality in south-west  
55  
56 441 Ethiopia: estimates and socio-economic inequality. *PloS one* 2014;9(4):e96294.  
57  
58  
59  
60

- 1  
2  
3 442 28. Gebretsadik S, Gabreyohannes E. Determinants of under-five mortality in high mortality  
4  
5 443 regions of Ethiopia: an analysis of the 2011 Ethiopia Demographic and Health Survey  
6  
7 444 data. *International Journal of Population Research* 2016;2016.
- 8  
9  
10 445 29. Negera A, Abelti G, Bogale T, et al. An analysis of the trends, differentials and key  
11  
12 446 proximate determinants of infant and under-five mortality in Ethiopia. Further Analysis  
13  
14 447 of the 2000, 2005, and 2011 Demographic and Health Surveys. . *DHS Further Analysis*  
15  
16 448 *Reports No 79 Calverton, Maryland, USA: ICF International* 2013.
- 17  
18  
19 449 30. Laelago T. Effects of preceding birth intervals on child mortality in Ethiopia; Evidence  
20  
21 450 from the Demographic and Health Surveys, 2016. *Epidemiology International Journal*  
22  
23 451 2019;3(1).
- 24  
25  
26 452 31. Hailemariam A, Tesfaye M. Determinants of infant and early childhood mortality in a small  
27  
28 453 urban community of Ethiopia: a hazard model analysis. *The Ethiopian Journal of*  
29  
30 454 *Health Development (EJHD)* 1997;11(3).
- 31  
32  
33 455 32. Dadi AF. A systematic review and meta-analysis of the effect of short birth interval on  
34  
35 456 infant mortality in Ethiopia. *PloS one* 2015;10(5):e0126759.
- 36  
37  
38 457 33. Sahle-Mariam Y, Berhane Y. Neonatal mortality among hospital delivered babies in Addis  
39  
40 458 Ababa, Ethiopia. *The Ethiopian Journal of Health Development (EJHD)* 1997;11(3).
- 41  
42  
43 459 34. Kolobo HA, Chaka TE, Kassa RT. Determinants of neonatal mortality among newborns  
44  
45 460 admitted to neonatal intensive care unit Adama, Ethiopia: A case-control study.  
46  
47 461 *Journal of Clinical Neonatology* 2019;8(4):232.
- 48  
49  
50 462 35. Bogale TN, Worku AG, Bikis GA, et al. Why gone too soon? Examining social  
51  
52 463 determinants of neonatal deaths in northwest Ethiopia using the three delay model  
53  
54 464 approach. *BMC pediatrics* 2017;17(1):216.
- 55  
56  
57 465 36. Woldeamanuel BT. Statistical analysis of neonatal mortality: a case study of Ethiopia.  
58  
59 466 *Journal of Pregnancy and Child Health* 2018;5(2):1-11.
- 60



- 1  
2  
3 467 37. Asefa M, Drewett R, Tessema F. A birth cohort study in South-West Ethiopia to identify  
4  
5 468 factors associated with infant mortality that are amenable for intervention. *Ethiopian*  
6  
7 469 *Journal of Health Development* 2000;14(2):161-68.
- 8  
9  
10 470 38. Muluye S, Wencheke E. Determinants of infant mortality in Ethiopia: A study based on the  
11  
12 471 2005 EDHS data. *Ethiopian Journal of Health Development* 2012;26(2):72-77.
- 13  
14 472 39. Deribew A, Tessema F, Girma B. Determinants of under-five mortality in Gilgel gibe field  
15  
16 473 research center, Southwest Ethiopia. *Ethiopian Journal of Health Development*  
17  
18 474 2007;21(2):117-24.
- 19  
20 475 40. Bedada D. Determinant of under-five child mortality in Ethiopia. *American Journal of*  
21  
22 476 *Theoretical and Applied Statistics* 2017;6(4):198-204.
- 23  
24 477 41. Ayele DG, Zewotir TT. Comparison of under-five mortality for 2000, 2005 and 2011  
25  
26 478 surveys in Ethiopia. *BMC public health* 2016;16(1):930.
- 27  
28 479 42. Shamebo D, Sandström A, Muhe L, et al. The Butajira project in Ethiopia: a nested case-  
29  
30 480 referent study of under-five mortality and its public health determinants. *Bulletin of the*  
31  
32 481 *World Health Organization* 1993;71(3-4):389.
- 33  
34 482 43. Croft TN, Aileen M. J. Marshall, Courtney K. Allen, et al. Guide to DHS Statistics.  
35  
36 483 *Rockville, Maryland, USA: ICF* 2018.
- 37  
38 484 44. ICF International. Demographic and Health Survey Interviewer's Manual. *MEASURE DHS*  
39  
40 485 *Basic Documentation No 2 Calverton, Maryland, USA: ICF International* 2012.
- 41  
42 486 45. Hailu D, Gulte T. Determinants of Short Interbirth Interval among Reproductive Age  
43  
44 487 Mothers in Arba Minch District, Ethiopia. *International journal of reproductive*  
45  
46 488 *medicine* 2016;2016 doi: 10.1155/2016/6072437
- 47  
48 489 46. Yohannes S, Wondafrash M, Abera M, et al. Duration and determinants of birth interval  
49  
50 490 among women of child bearing age in Southern Ethiopia. *BMC pregnancy and*  
51  
52 491 *childbirth* 2011;11(1):38.
- 53  
54  
55  
56  
57  
58  
59  
60

- 1  
2  
3 492 47. Textor J, van der Zander B, Gilthorpe MS, et al. Robust causal inference using directed  
4  
5 493 acyclic graphs: the R package ‘dagitty’. *International journal of epidemiology*  
6  
7 494 2016;45(6):1887-94.  
8  
9  
10 495 48. Attia JR, Oldmeadow C, Holliday EG, et al. Deconfounding confounding part 2: using  
11  
12 496 directed acyclic graphs (DAGs). *Medical Journal of Australia* 2017;206(11):480-83.  
13  
14 497 49. Shrier I, Platt RW. Reducing bias through directed acyclic graphs. *BMC medical research*  
15  
16 498 *methodology* 2008;8(1):70.  
17  
18 499 50. Garrido MM, Kelley AS, Paris J, et al. Methods for constructing and assessing propensity  
19  
20 500 scores. *Health services research* 2014;49(5):1701-20.  
21  
22 501 51. Xu S, Ross C, Raebel MA, et al. Use of stabilized inverse propensity scores as weights to  
23  
24 502 directly estimate relative risk and its confidence intervals. *Value in Health*  
25  
26 503 2010;13(2):273-77.  
27  
28 504 52. Lee Y, Hong I, Lee MJ, et al. Identifying risk of depressive symptoms in adults with  
29  
30 505 physical disabilities receiving rehabilitation services: Propensity score approaches.  
31  
32 506 *Annals of rehabilitation medicine* 2019;43(3):250.  
33  
34 507 53. Austin PC, Mamdani MM. A comparison of propensity score methods: a case-study  
35  
36 508 estimating the effectiveness of post-AMI statin use. *Statistics in medicine*  
37  
38 509 2006;25(12):2084-106.  
39  
40 510 54. Rosenbaum PR, Rubin DB. The central role of the propensity score in observational studies  
41  
42 511 for causal effects. *Biometrika* 1983;70(1):41-55.  
43  
44 512 55. Austin PC. A tutorial and case study in propensity score analysis: an application to  
45  
46 513 estimating the effect of in-hospital smoking cessation counseling on mortality.  
47  
48 514 *Multivariate behavioral research* 2011;46(1):119-51.  
49  
50 515 56. Guo S, Fraser MW. Propensity score analysis: Statistical methods and applications: SAGE  
51  
52 516 publications 2014.  
53  
54  
55  
56  
57  
58  
59  
60

- 1  
2  
3 517 57. Deb S, Austin PC, Tu JV, et al. A review of propensity-score methods and their use in  
4  
5 518 cardiovascular research. *Canadian Journal of Cardiology* 2016;32(2):259-65.  
6  
7  
8 519 58. Austin PC. An introduction to propensity score methods for reducing the effects of  
9  
10 520 confounding in observational studies. *Multivariate behavioral research*  
11  
12 521 2011;46(3):399-424.  
13  
14  
15 522 59. Austin PC, Stuart EA. Moving towards best practice when using inverse probability of  
16  
17 523 treatment weighting (IPTW) using the propensity score to estimate causal treatment  
18  
19 524 effects in observational studies. *Statistics in medicine* 2015;34(28):3661-79.  
20  
21  
22 525 60. Austin PC. Balance diagnostics for comparing the distribution of baseline covariates  
23  
24 526 between treatment groups in propensity-score matched samples. *Statistics in medicine*  
25  
26 527 2009;28(25):3083-107.  
27  
28  
29 528 61. Rosenbaum PR, Rubin DB. Constructing a control group using multivariate matched  
30  
31 529 sampling methods that incorporate the propensity score. *The American Statistician*  
32  
33 530 1985;39(1):33-38.  
34  
35  
36 531 62. DuGoff EH, Schuler M, Stuart EA. Generalizing observational study results: applying  
37  
38 532 propensity score methods to complex surveys. *Health services research*  
39  
40 533 2014;49(1):284-303.  
41  
42  
43 534 63. Rutstein SO. Effects of preceding birth intervals on neonatal, infant and under-five years  
44  
45 535 mortality and nutritional status in developing countries: evidence from the demographic  
46  
47 536 and health surveys. *International Journal of Gynecology & Obstetrics* 2005;89:S7-S24.  
48  
49  
50 537 64. Kozuki N, Walker N. Exploring the association between short/long preceding birth  
51  
52 538 intervals and child mortality: using reference birth interval children of the same mother  
53  
54 539 as comparison. *BMC public health* 2013;13(S3):S6.  
55  
56  
57 540 65. Rahman MM, Abidin S. Factors affecting neonatal mortality in Bangladesh. *Journal of*  
58  
59 541 *Health Management* 2010;12(2):137-52.  
60

- 1  
2  
3 542 66. Ezeh OK, Agho KE, Dibley MJ, et al. Determinants of neonatal mortality in Nigeria:  
4  
5 543 evidence from the 2008 demographic and health survey. *BMC Public Health*  
6  
7 544 2014;14(1):521.  
8  
9  
10 545 67. Conde-Agudelo A, Rosas-Bermudez A, Castaño F, et al. Effects of birth spacing on  
11  
12 546 maternal, perinatal, infant, and child health: a systematic review of causal mechanisms.  
13  
14 547 *Studies in family planning* 2012;43(2):93-114.  
15  
16  
17 548 68. Rousso D, Panidis D, Gkoutzioulis F, et al. Effect of the interval between pregnancies on  
18  
19 549 the health of mother and child. *European Journal of Obstetrics and Gynecology and*  
20  
21 550 *Reproductive Biology* 2002;105(1):4-6.  
22  
23  
24 551 69. King JC. The risk of maternal nutritional depletion and poor outcomes increases in early or  
25  
26 552 closely spaced pregnancies. *The Journal of nutrition* 2003;133(5):1732S-36S.  
27  
28  
29 553 70. WHO. Maternal, newborn, child and adolescent health: Postnatal care. [cited 11 July  
30  
31 554 2020]. Available from:  
32  
33 555 [https://www.who.int/maternal\\_child\\_adolescent/topics/newborn/postnatal\\_care/en/](https://www.who.int/maternal_child_adolescent/topics/newborn/postnatal_care/en/)  
34  
35 556 accessed 2020 11 July  
36  
37  
38 557 71. WHO, USAID, MCHIP, et al. Postnatal Care for Mothers and Newborns: Highlights from  
39  
40 558 the World Health Organization 2013 Guidelines. . 2015  
41  
42  
43 559 72. Omariba DWR, Beaujot R, Rajulton F. Determinants of infant and child mortality in Kenya:  
44  
45 560 an analysis controlling for frailty effects. *Population Research and Policy Review*  
46  
47 561 2007;26(3):299-321.  
48  
49  
50 562 73. Fotso JC, Cleland J, Mberu B, et al. Birth spacing and child mortality: an analysis of  
51  
52 563 prospective data from the Nairobi urban health and demographic surveillance system.  
53  
54 564 *Journal of biosocial science* 2013;45(6):779-98.  
55  
56  
57  
58  
59  
60

- 1  
2  
3 565 74. Lamichhane R, Zhao Y, Paudel S, et al. Factors associated with infant mortality in Nepal:  
4  
5 566 a comparative analysis of Nepal demographic and health surveys (NDHS) 2006 and  
6  
7 567 2011. *BMC public health* 2017;17(1):53.
- 8  
9  
10 568 75. SHARIFZADEH GR, Namakin K, Mehrjoufard H. An Epidemiological study on Infant  
11  
12 569 Mortality and factors affecting it in Rural Areas of Birjand, Iran. 2008.
- 13  
14  
15 570 76. Boerma JT, Bicego GT. Preceding birth intervals and child survival: searching for pathways  
16  
17 571 of influence. *Studies in family planning* 1992;23(4):243-56.
- 18  
19 572 77. Dewey KG, Cohen RJ. Does birth spacing affect maternal or child nutritional status? A  
20  
21 573 systematic literature review. *Maternal & child nutrition* 2007;3(3):151-73.
- 22  
23  
24 574 78. Stuebe A. The risks of not breastfeeding for mothers and infants. *Reviews in obstetrics and*  
25  
26 575 *gynecology* 2009;2(4):222.
- 27  
28  
29 576 79. Victora CG, Bahl R, Barros AJ, et al. Breastfeeding in the 21st century: epidemiology,  
30  
31 577 mechanisms, and lifelong effect. *The Lancet* 2016;387(10017):475-90.
- 32  
33 578 80. Biradar R, Patel KK, Prasad JB. Effect of birth interval and wealth on under-5 child  
34  
35 579 mortality in Nigeria. *Clinical Epidemiology and Global Health* 2019;7(2):234-38.
- 36  
37  
38 580 81. Andre FE, Booy R, Bock HL, et al. Vaccination greatly reduces disease, disability, death  
39  
40 581 and inequity worldwide. *Bulletin of the World health organization* 2008;86:140-46.
- 41  
42 582 82. Innis BL, Snitbhan R, Kunasol P, et al. Protection against hepatitis A by an inactivated  
43  
44 583 vaccine. *Jama* 1994;271(17):1328-34.
- 45  
46  
47 584 83. Arevshatian L, Clements C, Lwanga S, et al. An evaluation of infant immunization in  
48  
49 585 Africa: is a transformation in progress? *Bulletin of the World Health Organization*  
50  
51 586 2007;85:449-57.
- 52  
53  
54 587 84. Attia JR, Jones MP, Hure A. Deconfounding confounding part 1: traditional explanations.  
55  
56 588 *The Medical Journal of Australia* 2017;206(6):244-45.
- 57  
58  
59 589

1  
2  
3  
4 590 **Figure Legend**  
5  
6

7 591 **Figure 1** Direct Acyclic Graph (DAG) used to select controlling variables  
8  
9

10 592 **Figure 2** Schematic presentation of the overall steps followed in the analysis  
11  
12

13 593 **Figure 3** Balance of propensity scores before and after weighting across treatment and  
14  
15 594 comparison groups  
16

17 595 PS= propensity score  
18  
19  
20  
21  
22  
23  
24  
25  
26  
27  
28  
29  
30  
31  
32  
33  
34  
35  
36  
37  
38  
39  
40  
41  
42  
43  
44  
45  
46  
47  
48  
49  
50  
51  
52  
53  
54  
55  
56  
57  
58  
59  
60

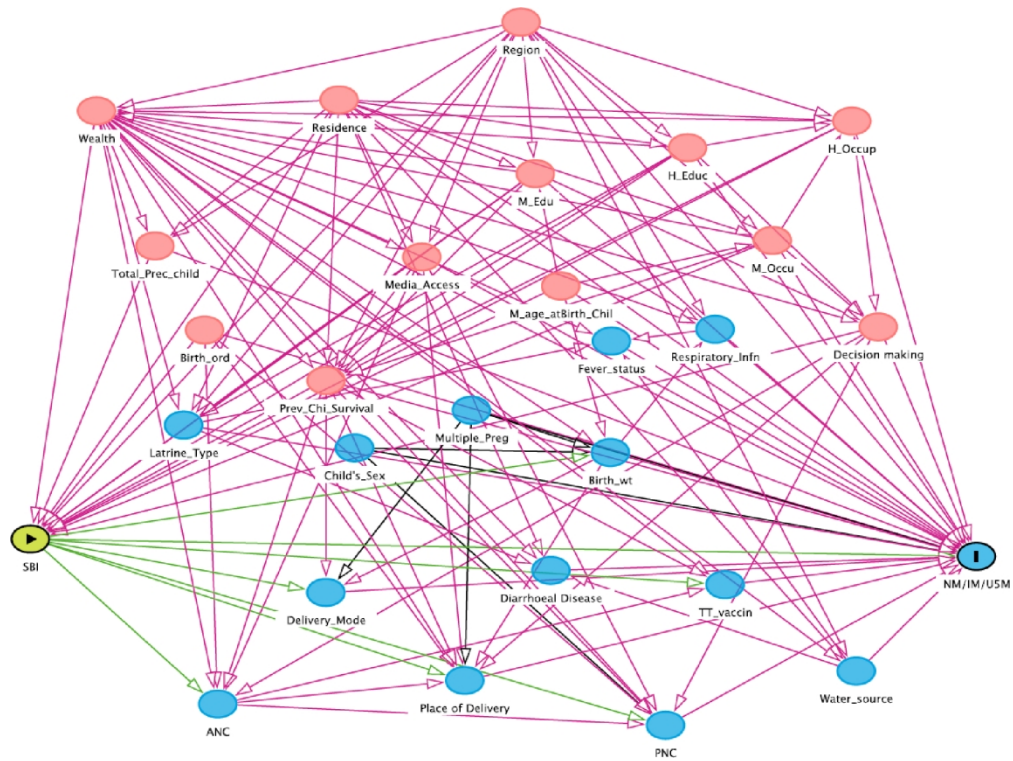

Figure 1 Direct Acyclic Graph (DAG) used to select controlling variables

157x118mm (300 x 300 DPI)

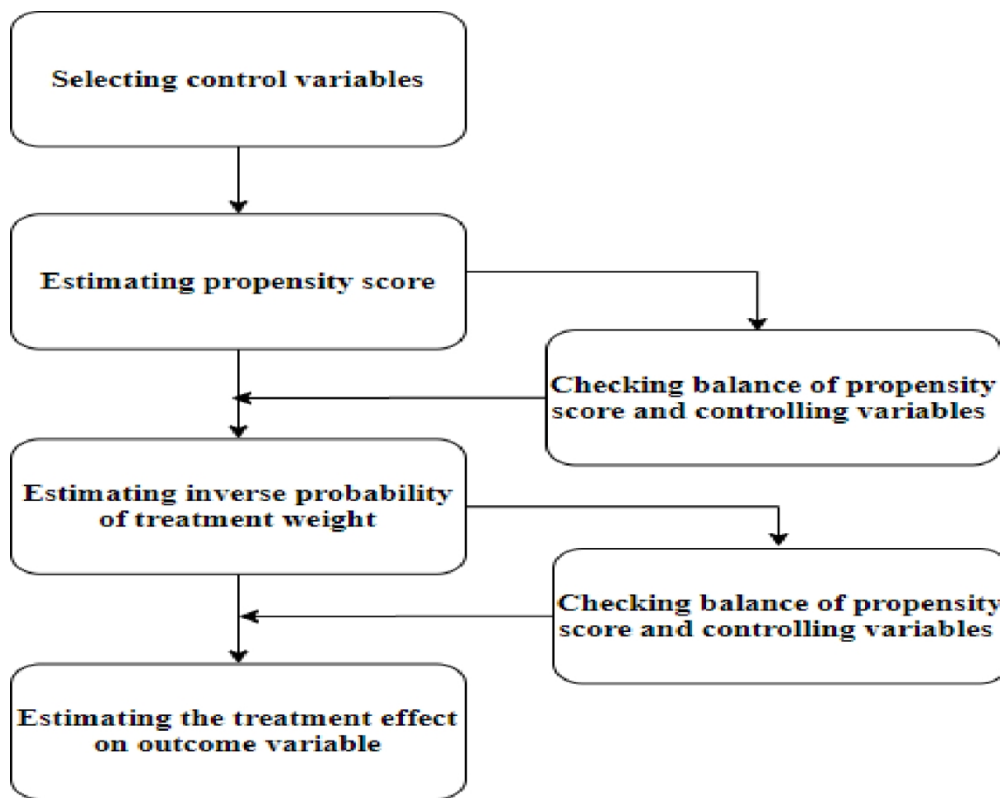

Figure 2 Schematic presentation of the overall steps followed in the analysis

115x90mm (300 x 300 DPI)



1  
2  
3  
4  
5  
6  
7  
8  
9  
10  
11  
12  
13  
14  
15  
16  
17  
18  
19  
20  
21  
22  
23  
24  
25  
26  
27  
28  
29  
30  
31  
32  
33  
34  
35  
36  
37  
38  
39  
40  
41  
42  
43  
44  
45  
46  
47  
48  
49  
50  
51  
52  
53  
54  
55  
56  
57  
58  
59  
60

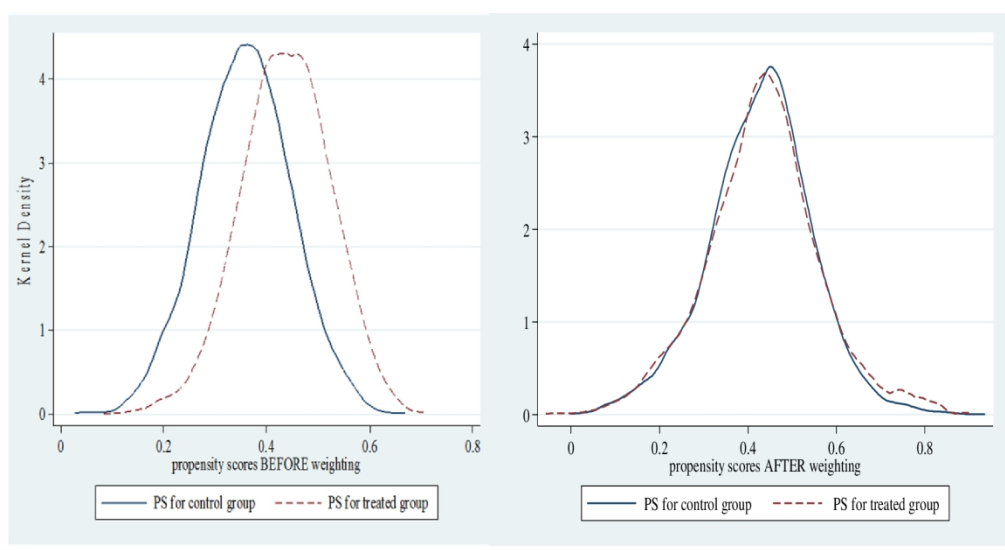

Figure 3 Balance of propensity scores before and after weighting across treatment and comparison groups; PS=propensity score

165x87mm (300 x 300 DPI)

## Supplemental Material I

**Table 1** Variables included in Direct Acyclic Graph

| Category                                   | Variables                                           | Definition                                                                                                                                                                                                                                                                                                                                                                                                                                    |
|--------------------------------------------|-----------------------------------------------------|-----------------------------------------------------------------------------------------------------------------------------------------------------------------------------------------------------------------------------------------------------------------------------------------------------------------------------------------------------------------------------------------------------------------------------------------------|
| <b>Maternal background characteristics</b> | Maternal age at birth of the index child (in years) | Maternal age at birth of the index child, which was considered as a continuous variable. It was also categorized the descriptive section of the results (1= $\leq 19$ , 2= 20-24, 3=25-29, 4=30-34, and 5= $\geq 35$ ).                                                                                                                                                                                                                       |
|                                            | Educational level                                   | Maximum educational level (1= Uneducated, 2=Primary and 3=Secondary+)                                                                                                                                                                                                                                                                                                                                                                         |
|                                            | Employment status                                   | Maternal employment status (1=Not Employed; 2=Employed))                                                                                                                                                                                                                                                                                                                                                                                      |
|                                            | Place of residence                                  | Place of residence (1=Urban; 2=Rural)                                                                                                                                                                                                                                                                                                                                                                                                         |
|                                            | Region                                              | Region of residence (1=Tigray, 2=Afar, 3=Amhara, 4=Oromia, 5=Somali, 6=Benishangul-Gumuz, 7=SNNPR*, 8=Gambella, 9=Harari, 10=Addis Ababa, 11=Dire Dawa)<br>*SNNPR= Southern Nations, Nationalities, and Peoples' Region                                                                                                                                                                                                                       |
|                                            | Decision making autonomy                            | Coded as 'yes' if the women were involved in all decisions regarding their own health care, major household purchases and visits to her family or relatives (1=Yes, 2=No).                                                                                                                                                                                                                                                                    |
| <b>Husband background characteristics</b>  | Husband's education                                 | Maximum educational level of the husband (1= Uneducated, 2= Primary, 3= Secondary+)                                                                                                                                                                                                                                                                                                                                                           |
|                                            | Husband's occupation                                | 1= Not employed, 2=Employed                                                                                                                                                                                                                                                                                                                                                                                                                   |
| <b>Household characteristics</b>           | Access to media                                     | 1=Access to media, 2= Have no access to media                                                                                                                                                                                                                                                                                                                                                                                                 |
|                                            | Wealth index                                        | The wealth index provided with the dataset was used. DHS program provides a composite index of household amenities based on the principal component analysis (PCA) and classified the population into quintiles: (1st quintile (Poorest); 2nd quintile; 3rd quintile; 4th quintile and 5th quintile (Richest). A quintile is used as a measure of its relative socioeconomic level (i.e., 1=Poorest; 2=Poorer; 3=Middle; 4=Richer; 5=Richest) |

|                                                                |                                                      |                                                                                                                                                                                                                                                                                                                                                                                                                                                                                                                                                                                                                                                                                                                                                                                                                                                            |
|----------------------------------------------------------------|------------------------------------------------------|------------------------------------------------------------------------------------------------------------------------------------------------------------------------------------------------------------------------------------------------------------------------------------------------------------------------------------------------------------------------------------------------------------------------------------------------------------------------------------------------------------------------------------------------------------------------------------------------------------------------------------------------------------------------------------------------------------------------------------------------------------------------------------------------------------------------------------------------------------|
| <b>Maternal health status and healthcare-related variables</b> | Antenatal care                                       | Women’s antenatal care utilization categorized as 1=No visit, 2=At least one visit, 3= ≥ Four visits                                                                                                                                                                                                                                                                                                                                                                                                                                                                                                                                                                                                                                                                                                                                                       |
|                                                                | Place of delivery                                    | 1= Health facilities, 2=Home                                                                                                                                                                                                                                                                                                                                                                                                                                                                                                                                                                                                                                                                                                                                                                                                                               |
|                                                                | Postnatal care                                       | Women received check-up at least once within 48 hours after delivery by a skilled provider; categorized as 1=Yes, 2=No                                                                                                                                                                                                                                                                                                                                                                                                                                                                                                                                                                                                                                                                                                                                     |
|                                                                | TT vaccination                                       | Women received at least two doses of the immunization during pregnancy (1=Yes, 2=No)                                                                                                                                                                                                                                                                                                                                                                                                                                                                                                                                                                                                                                                                                                                                                                       |
| <b>Neonatal, infant and child characteristics</b>              | Sex                                                  | Child sex (1=Male, 2=Female)                                                                                                                                                                                                                                                                                                                                                                                                                                                                                                                                                                                                                                                                                                                                                                                                                               |
|                                                                | Multiple pregnancy                                   | 1=Yes, 2=No                                                                                                                                                                                                                                                                                                                                                                                                                                                                                                                                                                                                                                                                                                                                                                                                                                                |
|                                                                | Birth weight                                         | 1=Below average, 2=Average, 3=Above average                                                                                                                                                                                                                                                                                                                                                                                                                                                                                                                                                                                                                                                                                                                                                                                                                |
|                                                                | Mode of delivery                                     | 1= Caesarean section, 2= Non caesarean section                                                                                                                                                                                                                                                                                                                                                                                                                                                                                                                                                                                                                                                                                                                                                                                                             |
|                                                                | Survival status of the preceding child               | 1= Yes, 2=No                                                                                                                                                                                                                                                                                                                                                                                                                                                                                                                                                                                                                                                                                                                                                                                                                                               |
|                                                                | Total number of children born before the index child | Total number of children born before the index child was considered as a continuous variable. For the descriptive statistics, this variable was categorized into 1= ≤2, 2= 3-4, and 3= ≥5.<br><br>This was done after checking for the linearity assumption with the log-odds of short birth interval, which is a binary response variable. Multicollinearity was also checked among the exposure variables using the variance inflation factor (VIF). When the values of VIF were lower than 10, then the collinearity problem was considered unlikely. The VIF for birth order was 18.15 and for the total number of children born before the index child was 16.26, which indicates the presence of collinearity. Therefore, we removed the variable birth order from the model and the VIF became less than 3 for each variable included in the model. |
|                                                                | Birth order                                          | Birth order is the order number of the births from first to last. Twins are given the same birth order, but the birth order of a child born after twins will be the total number of births preceding plus one.                                                                                                                                                                                                                                                                                                                                                                                                                                                                                                                                                                                                                                             |
|                                                                | Diarrhoeal Disease                                   | 1= Yes, 2=No                                                                                                                                                                                                                                                                                                                                                                                                                                                                                                                                                                                                                                                                                                                                                                                                                                               |
| Fever                                                          | 1=Yes, 2=No                                          |                                                                                                                                                                                                                                                                                                                                                                                                                                                                                                                                                                                                                                                                                                                                                                                                                                                            |
| Respiratory infection                                          | 1=Yes, 2=No                                          |                                                                                                                                                                                                                                                                                                                                                                                                                                                                                                                                                                                                                                                                                                                                                                                                                                                            |

|                              |                  |                                                                                                                                                                                                         |
|------------------------------|------------------|---------------------------------------------------------------------------------------------------------------------------------------------------------------------------------------------------------|
| <b>Environmental factors</b> | Source of water  | 1= Piped water, 2= Other improved (protected spring and well, and rain water), 3= Unimproved (river, pond, unprotected spring and well).                                                                |
|                              | Latrine facility | 1 = Improved (access to flush toilet, ventilated improved pit latrine, traditional pit latrine with a slab, or composting toilet and does not share this facility with other households), 2=unimproved. |

For peer review only

## Supplemental Material II

**Table 2** Standardized difference before and after weighting the propensity score

| Variable                                                 | Standardized difference |                 |
|----------------------------------------------------------|-------------------------|-----------------|
|                                                          | Before weighting        | After weighting |
| Maternal age at the birth of the index child (in years)* | -0.392                  | 0.022           |
| Maternal education                                       |                         |                 |
| Uneducated                                               | 0.178                   | 0.009           |
| Primary                                                  | -0.112                  | -0.017          |
| Maternal occupation                                      |                         |                 |
| Not employed                                             | 0.128                   | 0.005           |
| Husband education                                        |                         |                 |
| Uneducated                                               | 0.148                   | 0.012           |
| Primary                                                  | -0.041                  | 0.003           |
| Husband occupation                                       |                         |                 |
| Not employed                                             | 0.159                   | 0.006           |
| Wealth                                                   |                         |                 |
| Poorest                                                  | 0.332                   | -0.004          |
| Poorer                                                   | -0.002                  | 0.008           |
| Middle                                                   | -0.070                  | 0.005           |
| Richer                                                   | -0.061                  | -0.007          |
| Total number of preceding child*                         | 0.207                   | -0.006          |
| Survival status of preceding child                       |                         |                 |
| Yes                                                      | -0.029                  | -0.004          |
| Residence                                                |                         |                 |
| Urban                                                    | -0.239                  | -0.006          |
| Region                                                   |                         |                 |
| Tigray                                                   | -0.207                  | 0.004           |
| Afar                                                     | 0.186                   | 0.008           |
| Amhara                                                   | -0.282                  | 0.014           |
| Oromia                                                   | -0.006                  | 0.003           |
| Somali                                                   | 0.402                   | -0.003          |
| Benishangul-Gumuz                                        | 0.061                   | -0.006          |
| SNNPR**                                                  | -0.069                  | -0.005          |
| Gambella,                                                | -0.087                  | -0.009          |
| Harari                                                   | -0.001                  | -0.009          |
| Addis Ababa                                              | -0.180                  | 0.014           |
| Access to mass media                                     |                         |                 |
| Yes                                                      | -0.201                  | -0.002          |
| Decision making autonomy                                 |                         |                 |
| No                                                       | 0.067                   | -0.009          |

1  
2  
3 \*Maternal age at the birth of the index child (in years) and total number of the preceding  
4 child were considered as continuous variables; \*\*SNNPR= Southern Nations, Nationalities,  
5 and Peoples' Region  
6  
7  
8  
9  
10  
11  
12  
13  
14  
15  
16  
17  
18  
19  
20  
21  
22  
23  
24  
25  
26  
27  
28  
29  
30  
31  
32  
33  
34  
35  
36  
37  
38  
39  
40  
41  
42  
43  
44  
45  
46  
47  
48  
49  
50  
51  
52  
53  
54  
55  
56  
57  
58  
59  
60

For peer review only

## STROBE 2007 (v4) Statement—Checklist of items for the study

| Section/Topic                | Item # | Recommendation                                                                                                                                                                       | Reported on page # |
|------------------------------|--------|--------------------------------------------------------------------------------------------------------------------------------------------------------------------------------------|--------------------|
| Title and abstract           | 1      | (a) Indicate the study's design with a commonly used term in the title or the abstract                                                                                               | 2                  |
|                              |        | (b) Provide in the abstract an informative and balanced summary of what was done and what was found                                                                                  | 2                  |
| <b>Introduction</b>          |        |                                                                                                                                                                                      |                    |
| Background/rationale         | 2      | Explain the scientific background and rationale for the investigation being reported                                                                                                 | 3, 4, 5, & 6       |
| Objectives                   | 3      | State specific objectives, including any prespecified hypotheses                                                                                                                     | 6                  |
| <b>Methods</b>               |        |                                                                                                                                                                                      |                    |
| Study design                 | 4      | Present key elements of study design early in the paper                                                                                                                              | 6                  |
| Setting                      | 5      | Describe the setting, locations, and relevant dates, including periods of recruitment, exposure, follow-up, and data collection                                                      | 6                  |
| Participants                 | 6      | (a) Give the eligibility criteria, and the sources and methods of selection of participants                                                                                          | 6                  |
| Variables                    | 7      | Clearly define all outcomes, exposures, predictors, potential confounders, and effect modifiers. Give diagnostic criteria, if applicable                                             | 6, 7, & 8          |
| Data sources/<br>measurement | 8*     | For each variable of interest, give sources of data and details of methods of assessment (measurement). Describe comparability of assessment methods if there is more than one group | 6, 7, & 8          |
| Bias                         | 9      | Describe any efforts to address potential sources of bias                                                                                                                            | 8, 9, & 10         |
| Study size                   | 10     | Explain how the study size was arrived at                                                                                                                                            | 6                  |
| Quantitative variables       | 11     | Explain how quantitative variables were handled in the analyses. If applicable, describe which groupings were chosen and why                                                         | 6, 7, & 8          |
| Statistical methods          | 12     | (a) Describe all statistical methods, including those used to control for confounding                                                                                                | 8, 9, 10, & 11     |
|                              |        | (b) Describe any methods used to examine subgroups and interactions                                                                                                                  | 8, 9, 10, & 11     |
|                              |        | (c) Explain how missing data were addressed                                                                                                                                          | N/A                |
|                              |        | (d) If applicable, describe analytical methods taking account of sampling strategy                                                                                                   | 8, 9, 10, & 11     |
|                              |        | (e) Describe any sensitivity analyses                                                                                                                                                | 8, 9, 10, & 11     |

|                          |     |                                                                                                                                                                                                              |                    |
|--------------------------|-----|--------------------------------------------------------------------------------------------------------------------------------------------------------------------------------------------------------------|--------------------|
| <b>Results</b>           |     |                                                                                                                                                                                                              |                    |
| Participants             | 13* | (a) Report numbers of individuals at each stage of study—eg numbers potentially eligible, examined for eligibility, confirmed eligible, included in the study, completing follow-up, and analysed            | 11, 12, & 13       |
|                          |     | (b) Give reasons for non-participation at each stage                                                                                                                                                         | N/A                |
|                          |     | (c) Consider use of a flow diagram                                                                                                                                                                           | N/A                |
| Descriptive data         | 14* | (a) Give characteristics of study participants (eg demographic, clinical, social) and information on exposures and potential confounders                                                                     | 11, 12, & 13       |
|                          |     | (b) Indicate number of participants with missing data for each variable of interest                                                                                                                          | N/A                |
| Outcome data             | 15* | Report numbers of outcome events or summary measures                                                                                                                                                         | 9 and 11, 12, & 13 |
| Main results             | 16  | (a) Give unadjusted estimates and, if applicable, confounder-adjusted estimates and their precision (eg, 95% confidence interval). Make clear which confounders were adjusted for and why they were included | 15                 |
|                          |     | (b) Report category boundaries when continuous variables were categorized                                                                                                                                    | N/A                |
|                          |     | (c) If relevant, consider translating estimates of relative risk into absolute risk for a meaningful time period                                                                                             | N/A                |
| Other analyses           | 17  | Report other analyses done—eg analyses of subgroups and interactions, and sensitivity analyses                                                                                                               | 14                 |
| <b>Discussion</b>        |     |                                                                                                                                                                                                              |                    |
| Key results              | 18  | Summarise key results with reference to study objectives                                                                                                                                                     | 15 & 16            |
| Limitations              | 19  | Discuss limitations of the study, taking into account sources of potential bias or imprecision. Discuss both direction and magnitude of any potential bias                                                   | 17 & 18            |
| Interpretation           | 20  | Give a cautious overall interpretation of results considering objectives, limitations, multiplicity of analyses, results from similar studies, and other relevant evidence                                   | 15, 16, 17, & 18   |
| Generalisability         | 21  | Discuss the generalisability (external validity) of the study results                                                                                                                                        | 15, 16, 17, & 18   |
| <b>Other information</b> |     |                                                                                                                                                                                                              |                    |
| Funding                  | 22  | Give the source of funding and the role of the funders for the present study and, if applicable, for the original study on which the present article is based                                                | 19                 |

\*Give information separately for cases and controls in case-control studies and, if applicable, for exposed and unexposed groups in cohort and cross-sectional studies.

**Note:** An Explanation and Elaboration article discusses each checklist item and gives methodological background and published examples of transparent reporting. The STROBE checklist is best used in conjunction with this article (freely available on the Web sites of PLoS Medicine at <http://www.plosmedicine.org/>, Annals of Internal Medicine at <http://www.annals.org/>, and Epidemiology at <http://www.epidem.com/>). Information on the STROBE Initiative is available at [www.strobe-statement.org](http://www.strobe-statement.org).



# BMJ Open

## The effects of short birth interval on neonatal, infant and under-five child mortality in Ethiopia: a nationally representative observational study using inverse probability of treatment weighting

|                                 |                                                                                                                                                                                                                                                                                                                                                                                                                                                                                                                                                                                 |
|---------------------------------|---------------------------------------------------------------------------------------------------------------------------------------------------------------------------------------------------------------------------------------------------------------------------------------------------------------------------------------------------------------------------------------------------------------------------------------------------------------------------------------------------------------------------------------------------------------------------------|
| Journal:                        | <i>BMJ Open</i>                                                                                                                                                                                                                                                                                                                                                                                                                                                                                                                                                                 |
| Manuscript ID                   | bmjopen-2020-047892.R2                                                                                                                                                                                                                                                                                                                                                                                                                                                                                                                                                          |
| Article Type:                   | Original research                                                                                                                                                                                                                                                                                                                                                                                                                                                                                                                                                               |
| Date Submitted by the Author:   | 05-Jul-2021                                                                                                                                                                                                                                                                                                                                                                                                                                                                                                                                                                     |
| Complete List of Authors:       | Shifti, Desalegn Markos; St Paul's Hospital Millennium Medical College; The University of Newcastle School of Medicine and Public Health, Centre for Women's Health Research<br>Chojenta, Catherine; The University of Newcastle School of Medicine and Public Health, Centre for Women's Health Research<br>Holliday, Elizabeth; The University of Newcastle School of Medicine and Public Health, Centre for Clinical Epidemiology and Biostatistics<br>Loxton, Deborah; The University of Newcastle School of Medicine and Public Health, Centre for Women's Health Research |
| <b>Primary Subject Heading</b>: | Public health                                                                                                                                                                                                                                                                                                                                                                                                                                                                                                                                                                   |
| Secondary Subject Heading:      | Epidemiology, Obstetrics and gynaecology, Paediatrics, Reproductive medicine                                                                                                                                                                                                                                                                                                                                                                                                                                                                                                    |
| Keywords:                       | PUBLIC HEALTH, EPIDEMIOLOGY, Maternal medicine < OBSTETRICS, Community child health < PAEDIATRICS                                                                                                                                                                                                                                                                                                                                                                                                                                                                               |
|                                 |                                                                                                                                                                                                                                                                                                                                                                                                                                                                                                                                                                                 |

SCHOLARONE™  
Manuscripts



I, the Submitting Author has the right to grant and does grant on behalf of all authors of the Work (as defined in the below author licence), an exclusive licence and/or a non-exclusive licence for contributions from authors who are: i) UK Crown employees; ii) where BMJ has agreed a CC-BY licence shall apply, and/or iii) in accordance with the terms applicable for US Federal Government officers or employees acting as part of their official duties; on a worldwide, perpetual, irrevocable, royalty-free basis to BMJ Publishing Group Ltd ("BMJ") its licensees and where the relevant Journal is co-owned by BMJ to the co-owners of the Journal, to publish the Work in this journal and any other BMJ products and to exploit all rights, as set out in our [licence](#).

The Submitting Author accepts and understands that any supply made under these terms is made by BMJ to the Submitting Author unless you are acting as an employee on behalf of your employer or a postgraduate student of an affiliated institution which is paying any applicable article publishing charge ("APC") for Open Access articles. Where the Submitting Author wishes to make the Work available on an Open Access basis (and intends to pay the relevant APC), the terms of reuse of such Open Access shall be governed by a Creative Commons licence – details of these licences and which [Creative Commons](#) licence will apply to this Work are set out in our licence referred to above.

Other than as permitted in any relevant BMJ Author's Self Archiving Policies, I confirm this Work has not been accepted for publication elsewhere, is not being considered for publication elsewhere and does not duplicate material already published. I confirm all authors consent to publication of this Work and authorise the granting of this licence.

1  
2  
3  
4 1 **The effects of short birth interval on neonatal, infant and**  
5  
6  
7 2 **under-five child mortality in Ethiopia: a nationally**  
8  
9  
10 3 **representative observational study using inverse**  
11  
12  
13 4 **probability of treatment weighting**  
14  
15  
16

17  
18 5 Desalegn Markos Shifti<sup>1,2,\*</sup>, Catherine Chojenta<sup>2</sup>, Elizabeth G. Holliday<sup>3</sup>, Deborah Loxton<sup>2</sup>  
19

20  
21 6 **Affiliation**  
22

23  
24 7 <sup>1</sup>Saint Paul's Hospital Millennium Medical College, Addis Ababa, Ethiopia  
25

26  
27 8 <sup>2</sup>Centre for Women's Health Research, School of Medicine and Public Health, University of  
28  
29 9 Newcastle, New South Wales, Australia  
30

31  
32 10 <sup>3</sup>Centre for Clinical Epidemiology and Biostatistics, School of Medicine and Public Health,  
33  
34 11 University of Newcastle, New South Wales, Australia  
35  
36

37  
38 12  
39  
40 13 \*Corresponding author  
41

42  
43  
44 14 [desalegnmarkos@gmail.com](mailto:desalegnmarkos@gmail.com), [desalegnmarkos.shifti@uon.edu.au](mailto:desalegnmarkos.shifti@uon.edu.au)  
45  
46  
47 15

## 17 **Abstract**

18 **Objective** To assess the effect of short birth interval on neonatal, infant, and under-five  
19 mortality in Ethiopia.

20 **Design** A nationally representative cross-sectional survey.

21 **Setting** This study used data from the Ethiopia Demographic and Health Survey (EDHS) 2016.

22 **Participants** A total of 8,448 women who had at least two live births during the five years  
23 preceding the survey were included in the analysis.

24 **Outcome measures** Neonatal mortality (death of the child within 28 days of birth), infant  
25 mortality (death between birth and 11 months), and under-five mortality (death between birth  
26 and 59 months) were the outcome variables.

27 **Methods** Weighted logistic regression analysis based on inverse probability of treatment  
28 weights (IPTW) was used to estimate exposure effects adjusted for potential confounders.

29 **Results** The adjusted odds of neonatal mortality were about 85% higher among women with  
30 short birth interval (AOR=1.85, 95% CI= 1.19, 2.89) than those without. The odds of infant  
31 mortality were two-fold higher (AOR=2.16, 95% CI= 1.49, 3.11) among women with short  
32 birth interval. The odds of under-five child mortality were also about two times higher  
33 (AOR=2.26, 95% CI= 1.60, 3.17) higher among women with short birth interval.

34 **Conclusion** Short birth interval has a significant effect on neonatal, infant, and under-five  
35 mortality in Ethiopia. Interventions targeting short birth interval are warranted to reduce  
36 neonatal, infant, and under-five mortality.

### 38 **Strengths and limitations of this study**

- 39 • The application of inverse probability of treatment weights (IPTW) mimics a randomized  
40 clinical trial by matching two comparison groups using a conditional probability of  
41 receiving exposure (short birth interval in this case) given a set of covariates.
- 42 • The study has also additional strengths, such as using data from a nationally representative  
43 survey with a large sample size.
- 44 • The application of DAGs, a graphical tool used to identify minimum adjustment sets, which  
45 defined the set of explanatory variables for the propensity scores model was another  
46 strength of this study.
- 47 • Due to the cross-sectional nature of the study, temporal associations between short birth  
48 interval and neonatal, infant, and under-five mortality may not be established.
- 49 • Another limitation of our study could be associated with the nonrandomized design of the  
50 study—propensity score-based analysis, IPTW, cannot account for unknown confounders  
51 in the same way that a randomised trial can, so the effect of residual confounders may not  
52 be avoided.

## 54 Introduction

55 Short birth interval, defined as a birth-to-birth interval of less than 33 months,<sup>1</sup> is a key public  
56 health problem with an estimated prevalence of 45.8% in Ethiopia.<sup>2</sup> Previous studies<sup>2-4</sup> have  
57 revealed the multifactorial nature of short birth interval, its spatial variation, and  
58 socioeconomic inequality in Ethiopia. Only about one-third of women in Ethiopia use modern  
59 contraceptives, which can prevent short birth interval.<sup>5</sup> Literature has also shown the effects of  
60 short birth interval may include, but are not limited to, preterm birth,<sup>6 7</sup> low birth weight,<sup>6 7</sup>  
61 small sizes for gestational age,<sup>6</sup> congenital anomalies,<sup>8 9</sup> autism,<sup>10</sup> miscarriage,  
62 preeclampsia, and premature rupture of membranes.<sup>11 12</sup>

63 Neonatal, infant, and under-five mortality are defined as the death of a child within 28 days of  
64 birth, before the age of 1 year, and before five years, respectively.<sup>5</sup> These mortality outcomes  
65 are regarded as a highly sensitive (proxy) measure of population health, a country's poverty  
66 and socioeconomic development status, and the availability and quality of health services and  
67 medical technology.<sup>13 14</sup>

68 The Sustainable Development Goal (SDG) 3.2 states that all countries should aim to reduce  
69 the neonatal mortality rate (NMR) to 12 deaths per 1000 live births or fewer, and reduce under-  
70 five mortality to 25 deaths per 1000 live births or fewer, by 2030.<sup>15</sup> The Growth and  
71 Transformation Plan of Ethiopia (GTPE) II also targets reductions in neonatal, infant, and  
72 under-five mortality rates, from 28 per 1000 live births, 44 per 1000 live births, and 64 per  
73 1000 live births in 2014/15 to 10, 20, and 30 per 1000 live births by 2019/20, respectively.<sup>16</sup>  
74 However, the 2019 Ethiopia Mini Demographic and Health Survey (EMDHS) report revealed  
75 that the neonatal, infant, and under-five mortality rates in Ethiopia were 30, 43, and 55 deaths  
76 per 1,000 live births, respectively: still much higher than GTPE targets.<sup>16 17</sup>

1  
2  
3 77 Literature from Ethiopia has shown that neonatal, infant, and under-five mortality are  
4  
5 78 associated with maternal education,<sup>18 19</sup> lack of antenatal care,<sup>20</sup> home delivery,<sup>21</sup> preterm  
6  
7 79 birth,<sup>20 22</sup> low birth weight,<sup>21 22</sup> multiple births,<sup>18 20 23 24</sup> sex of the child,<sup>18 20 23-26</sup> wealth status,<sup>27</sup>  
8  
9 80 <sup>28</sup> place of residence,<sup>21 24 25</sup> sources of drinking water,<sup>28</sup> and lack of access to an improved toilet  
10  
11 81 facility.<sup>29</sup>  
12  
13  
14

15 82 Although previous studies<sup>18-20 24 25 28-32</sup> have suggested birth interval as one factor influencing  
16  
17 83 neonatal, infant, under-five mortality, these studies have several limitations. Of the key  
18  
19 84 limitations is that these studies<sup>18-20 24 25 28-32</sup> did not use the World Health Organization (WHO)  
20  
21 85 recommended<sup>1</sup> definition of short birth interval. Understanding the impact of short birth  
22  
23 86 interval on neonatal, infant, and under-five mortality, using the WHO definition,<sup>1</sup> is necessary  
24  
25 87 for the formulation of valid, consistent policies and health planning strategies and interventions  
26  
27 88 to improve child health outcomes. Second, women who were not eligible to provide birth  
28  
29 89 interval information (i.e., those who had given birth only once) were included in the analysis  
30  
31 90 of some studies.<sup>20 25 29</sup> This may result in underestimation or obscuration of the true effect of  
32  
33 91 birth interval on child mortality. Third, even among studies using the same definition of short  
34  
35 92 birth interval, findings have been inconsistent.<sup>20 25</sup> One of the studies using national data<sup>20</sup> did  
36  
37 93 not control for a range of potential confounders including maternal education, wealth status,  
38  
39 94 number of children, and region of residence, even though these data were available in the  
40  
41 95 datasets used for analysis. Similarly, another previous study<sup>30</sup> that used national data did not  
42  
43 96 condition on maternal occupation, husband education, husband occupation, the total number of  
44  
45 97 preceding children, regions, access to mass media, and women's decision making autonomy.  
46  
47 98 In addition, various studies did not consider short birth interval as a potential predictor of  
48  
49 99 neonatal,<sup>22 26 27 33-36</sup> infant,<sup>19 37 38</sup> and under-five mortality<sup>39-42</sup> in their studies.  
50  
51  
52  
53  
54  
55  
56  
57  
58  
59  
60

1  
2  
3 100 Generally, the effect of short birth interval, as per the most recent WHO recommendation,<sup>1</sup> on  
4  
5 101 neonatal, infant, and under-five mortality has not been investigated in Ethiopia. Evidence  
6  
7 102 regarding the effect of short birth interval is required for informed decision making by policy  
8  
9 103 makers and health program planners. This paper aimed to assess the effect of short birth interval  
10  
11 104 on neonatal, infant, and under-five mortality using the most recent WHO definition and  
12  
13 105 adjusting for a comprehensive set of potential confounders.  
14  
15

## 16 17 106 **Methods**

### 18 19 20 107 **Study design and study area**

21  
22  
23 108 This analysis used data from the Ethiopia Demographic and Health Survey (EDHS) 2016. The  
24  
25 109 EDHS is a nationally representative cross-sectional study conducted in nine geographical  
26  
27 110 regions (Tigray, Afar, Amhara, Oromia, Somali, Benishangul-Gumuz, Southern Nations  
28  
29 111 Nationalities and Peoples (SNNP), Gambela, and Harari) and two administrative cities (Addis  
30  
31 112 Ababa and Dire Dawa). A two-stage, stratified, clustered random sampling design was  
32  
33 113 employed to collect data from women who gave birth within the five years preceding the  
34  
35 114 survey. Further descriptions of the sampling procedure for the EDHS are presented elsewhere.<sup>5</sup>  
36  
37  
38 115 A total of 8,448 women who had at least two live births during the five years preceding the  
39  
40 116 2016 survey were included in the analysis. When women had more than two births in the five  
41  
42 117 years preceding the survey, the birth interval between the most recent index child and the  
43  
44 118 immediately preceding child was considered for all the study participants.  
45  
46  
47

### 48 119 **Variables**

#### 49 50 120 **Outcome variables**

51  
52  
53 121 The outcome variables in the current study were neonatal mortality (death of the child within  
54  
55 122 28 days of birth), infant mortality (death between birth and 11 months), and under-five  
56  
57  
58  
59  
60



1  
2  
3 123 mortality (death between birth and 59 months).<sup>5 43</sup> These outcomes were coded as binary  
4  
5 124 variables (1/0).

### 8 125 **Treatment/exposure variable**

10 126 Short birth interval was the treatment variable and was defined as a birth-to-birth interval of  
11  
12  
13 127 less than 33 months as per the WHO definition.<sup>1</sup> A preceding birth interval, the amount of time  
14  
15 128 between the birth of the child under study (index child) and the immediately preceding birth,  
16  
17 129 was considered in this study. Women's birth interval data were collected by extracting the date  
18  
19 130 of birth of their biological children data from the children's birth /immunization certificate,  
20  
21  
22 131 and/or asking for information regarding their children's date of birth from the women. Mothers  
23  
24 132 were asked to confirm the accuracy of the information before documenting children's date of  
25  
26 133 birth from children's birth/immunization certificates. This crosschecking was performed to  
27  
28  
29 134 avoid errors, since in some cases the documented birth date may represent the date when the  
30  
31 135 birth was recorded, rather than the actual birth date. In the absence of children's birth  
32  
33 136 certificates, information regarding children's date of birth was obtained from their mothers.  
34  
35  
36 137 Further information regarding birth interval data collection is provided elsewhere.<sup>2 3 44</sup>

### 38 138 **Control variables**

40 139 After reviewing relevant literature,<sup>2 18-21 23-25 28 29 39 45 46</sup> Direct Acyclic Graphs (DAGs) were  
42  
43 140 constructed using DAGitty 3.0<sup>47</sup> to identify confounders for the association between short  
44  
45 141 birth interval and neonatal, infant, and under-five child mortality. Adjustment for such  
46  
47 142 confounders is necessary to estimate the unbiased effect of SBI on neonatal, infant, and  
48  
49 143 under-five mortality (figure 1). DAG is a formal system of mapping variables and the direction  
50  
51  
52 144 of causal relationships among them.<sup>48 49</sup> This graphical representation of causal effects among  
53  
54 145 variables helps understand whether bias is potentially reduced or increased when conditioning  
55  
56  
57 146 on covariates. Moreover, it illustrates covariates that lie in the causal pathway between the  
58  
59 147 treatment and outcomes, which should not be included in the analysis as a confounder. These

1  
2  
3 148 variables are indicated by green lines in Figure 1. This is because a propensity score that  
4  
5 149 includes covariates affected by the treatment (i.e., variables on the causal pathway between  
6  
7  
8 150 treatment and outcome) obscures part of the treatment effect that one is trying to estimate.<sup>50</sup>  
9  
10 151 Identified confounders were maternal age at the birth of the index child, maternal education,  
11  
12 152 maternal occupation, husband's education, husband's occupation, household wealth status,  
13  
14 153 survival status of the preceding child, the total number of the preceding child, place of residence  
15  
16  
17 154 (urban/rural), regions, access to media, and decision making autonomy. A list of all variables  
18  
19 155 considered in the DAG is provided in Supplementary Material I.

20  
21  
22 156 A yellowish-green circle with a triangle at its centre indicates the main treatment/exposure  
23  
24 157 variable, a blue circle with a vertical bar at its centre indicates the outcome variable, light red  
25  
26  
27 158 circles indicate ancestors of exposure and outcome (i.e., confounders). Blue circles indicate the  
28  
29 159 ancestors of the outcome variable. Green lines indicate a causal pathway. Red lines indicate  
30  
31 160 open paths by which confounding may occur; this confounding can be removed by adjusting  
32  
33 161 for one or several variables on the pathway.

## 34 162 **Data analyses**

35  
36  
37  
38 163 Participants' characteristics were described using frequency with percent. P-values were  
39  
40 164 calculated using Pearson's chi-squared test. Given that the outcomes (i.e., neonatal, infant, and  
41  
42 165 under-five mortality) were relatively infrequent, the unbiased effect of short birth interval on  
43  
44 166 each outcome was estimated using propensity scores (PS) with a stabilized method of inverse  
45  
46 167 probability of treatment weighting (IPTW). A previous study<sup>51</sup> has shown that IPTW with  
47  
48 168 stabilized weights preserves the sample size of the original data, provides an appropriate  
49  
50 169 estimation of the variance of the main effect, and maintains an appropriate type I error rate.  
51  
52  
53 170 The other methods, such as IPTW with normalized weight and greedy algorithm with 1:1  
54  
55 171 matching methods, are discussed elsewhere.<sup>52-54</sup> A propensity score is defined as the  
56  
57 172 probability of treatment assignment given observed baseline covariates (described in  
58  
59  
60

1  
2  
3 173 Supplementary Material II).<sup>54</sup> Propensity scores are used to estimate treatment effects on  
4  
5 174 outcomes using observational data when confounding bias due to non-random treatment  
6  
7 175 assignment is likely.<sup>50</sup> Inverse probability of treatment weighting weights the entire study  
8  
9 176 sample by the inverse of the propensity score;<sup>55</sup> a differential amount of information is used  
10  
11 177 from each participant, depending on their conditional probability of receiving treatment. This  
12  
13 178 means observations are less likely to be lost than when using matching for confounder  
14  
15 179 adjustment.<sup>56 57</sup> Propensity scores are a robust alternative to covariate adjustment when the  
16  
17 180 outcome variable is rare, resulting in data sparsity and estimation issues in multivariable  
18  
19 181 models.<sup>57</sup> In this study, the weighted prevalence of the outcome variables of neonatal, infant,  
20  
21 182 and under-five mortality were 2.9% (95% CI: 2.39, 3.61), 4.8% (95% CI: 4.11, 5.58), and 5.5%  
22  
23 183 (95% CI: 4.73, 6.44), respectively.

24  
25  
26 184 The analysis procedure was as follows. First, the propensity score was estimated using a  
27  
28 185 logistic regression model in which treatment assignment (short birth interval vs. non-short birth  
29  
30 186 interval) was regressed on the 11 covariates identified using the DAG. The balance of measured  
31  
32 187 covariates/confounders was then assessed across treatment groups (i.e., women with short birth  
33  
34 188 interval) and comparison groups (i.e., women with non-short birth interval) before and after  
35  
36 189 weighting, by computing standardized differences (Supplementary Material II).<sup>57 58</sup> For a  
37  
38 190 continuous covariate, the standardized difference<sup>58 59</sup> is defined as:

$$d = \frac{(\bar{x}_{treatment} - \bar{x}_{control})}{\sqrt{\frac{s_{treatment}^2 + s_{control}^2}{2}}}$$

39  
40  
41 191 where  $\bar{x}_{treatment}$  and  $\bar{x}_{control}$  denote the sample mean of the covariate in treated and untreated  
42  
43 192 subjects, respectively and  $s_{treatment}^2$  and  $s_{control}^2$  denote the corresponding sample variances of  
44  
45 193 the covariate. The standardized difference<sup>58 59</sup> for a dichotomous variable is given as:

$$d = \frac{(\hat{p}_{treatment} - \hat{p}_{control})}{\sqrt{\frac{\hat{p}_{treatment}(1 - \hat{p}_{treatment}) + \hat{p}_{control}(1 - \hat{p}_{control})}{2}}}$$

194 where  $\hat{p}_{treatment}$  and  $\hat{p}_{control}$  denote the prevalence of the dichotomous variable in treated  
 195 and untreated subjects, respectively.

196 A standard difference less than 0.1 has been suggested as indicating a negligible difference in  
 197 the mean or prevalence of a covariate between treatment and control groups and was used  
 198 here.<sup>58</sup> In addition, kernel densities were plotted to graphically demonstrate the propensity  
 199 score balance in the treatment group (i.e., women with short birth interval) and control groups  
 200 (women with non-short birth interval). Balance in propensity scores was considered to be  
 201 achieved when the kernel density line for the treatment group and control group lay closer  
 202 together.<sup>60</sup> The inverse probability of treatment weights was then calculated as 1/PS for those  
 203 exposed to short birth interval and 1/ (1 - PS) for those who were not. The sample was then  
 204 reweighted by the IPTW and the balance of the covariates checked in the reweighted  
 205 sample.<sup>50 61</sup> Stabilization of weights was made to preserve the sample size of the original  
 206 data, reduce the effect of weights of either treated subjects with low propensity scores or  
 207 untreated subjects with high propensity scores, and provides appropriate improve the  
 208 estimation of variance estimates and confidence intervals for the treatment effect.<sup>51</sup> Since  
 209 the EDHS employed a two-stage, stratified, clustered random sampling, which is a complex  
 210 sampling procedure, sampling weights were also used to adjust for the non-proportional  
 211 allocation of sample participants to different regions, including urban and rural areas, and  
 212 consider the possible differences in response rates.<sup>5</sup> Finally, a weighted logistic regression was  
 213 fit to estimate the effect of the treatment (short birth interval) on each outcome variable  
 214 (neonatal, infant, and under-five mortality). Estimation of the treatment effect on outcome  
 215 variables in the final model used the grand weight, which was formed as the product of the  
 216 survey weight and the stabilized weight. Literature has shown that combining a propensity

1  
2  
3 217 score method and survey weighting is necessary to estimate unbiased treatment effects which  
4  
5 218 are generalizable to the original survey target population.<sup>62</sup> The treatment effect on the outcome  
6  
7  
8 219 variables was expressed as adjusted odds ratios (AORs) with a 95% confidence interval (CI).  
9  
10 220 Statistical analysis was performed using Stata version 14 statistical software (*StataCorp. Stata*  
11  
12 221 *Statistical Software: Release 14. College Station, TX: StataCorp LP. 2015*). Figure 2 presents  
13  
14  
15 222 a schematic summary of the overall analysis procedure.

## 17 223 **Patient and public involvement**

18  
19  
20 224 Patients and/or the general public were not involved in the design, or conduct, or drafting of  
21  
22 225 this secondary analysis.

## 24 226 **Results**

### 27 227 **Respondents' characteristics**

28  
29  
30 228 Table 1 illustrates the baseline characteristics of the study participants. The occurrence of  
31  
32 229 neonatal mortality differed with maternal age at birth, with mortality rates being higher among  
33  
34 230 mothers aged  $\geq 35$  ( $p=0.021$ ). Neonatal mortality was also higher in rural than in urban areas  
35  
36 231 ( $p=0.004$ ). Similarly, infant mortality and under-five mortality were somewhat higher in rural  
37  
38 232 areas ( $p<0.001$ ). Under-five mortality was higher among uneducated mothers ( $p=0.027$ ) and in  
39  
40 233 mothers without access to mass media ( $p=0.043$ ). Mortality at all ages was higher among  
41  
42 234 infants with at least five siblings ( $p<0.0001$ ). Both infant and under-five mortality were slightly  
43  
44  
45 235 higher among women from the richer household  
46  
47  
48  
49  
50  
51  
52  
53  
54  
55  
56  
57  
58  
59  
60

236 **Table 1** The weighted distribution of neonatal, infant, and under-five child mortality by background characteristics, EDHS 2016

| Variable                                                | Neonatal Mortality |            | P-value | Infant Mortality |            | P-value | Under-five Mortality |            | P-value |
|---------------------------------------------------------|--------------------|------------|---------|------------------|------------|---------|----------------------|------------|---------|
|                                                         | No (%)             | Yes (%)    |         | No (%)           | Yes (%)    |         | No (%)               | Yes (%)    |         |
| Maternal age at the birth of the index child (in years) |                    |            |         |                  |            |         |                      |            |         |
| ≤19                                                     | 291 (3.2)          | 17 (5.8)   | 0.021   | 283 (3.1)        | 25 (6.5)   | 0.065   | 280 (3.1)            | 28 (6.0)   | 0.068   |
| 20-24                                                   | 1950 (23.4)        | 52 (18.8)  |         | 1896 (23.2)      | 106 (23.7) |         | 1877 (23.3)          | 125 (23.0) |         |
| 25-29                                                   | 2587 (30.8)        | 67 (26.0)  |         | 2536 (30.8)      | 118 (27.6) |         | 2516 (30.8)          | 138 (27.4) |         |
| 30-34                                                   | 1836 (22.7)        | 59 (22.6)  |         | 1802 (22.9)      | 93 (21.0)  |         | 1781 (22.7)          | 114 (22.9) |         |
| ≥35                                                     | 1533 (19.9)        | 56 (26.8)  |         | 1515 (20.0)      | 74 (21.2)  |         | 1500 (20.1)          | 89 (20.7)  |         |
| Maternal education                                      |                    |            |         |                  |            |         |                      |            |         |
| Uneducated                                              | 5890 (73.9)        | 182 (75.0) | 0.859   | 5759 (73.8)      | 313 (75.9) | 0.157   | 5694 (73.9)          | 378 (75.5) | 0.027   |
| Primary                                                 | 1744 (22.0)        | 54 (19.7)  |         | 1715 (22.0)      | 83 (20.8)  |         | 1704 (22.0)          | 94 (21.1)  |         |
| Secondary+                                              | 563 (4.1)          | 15 (5.3)   |         | 558 (4.2)        | 20 (3.3)   |         | 556 (4.1)            | 22 (3.4)   |         |
| Maternal occupation                                     |                    |            |         |                  |            |         |                      |            |         |
| Not employed                                            | 5935 (72.9)        | 178 (74.6) | 0.604   | 5807 (72.9)      | 306 (73.2) | 0.575   | 5747 (72.9)          | 366 (73.6) | 0.376   |
| Employed                                                | 2267 (27.1)        | 73 (25.4)  |         | 2225 (27.1)      | 110 (26.8) |         | 2207 (27.1)          | 128 (26.4) |         |
| Husband education                                       |                    |            |         |                  |            |         |                      |            |         |
| Uneducated                                              | 4186 (49.9)        | 145 (53.2) | 0.092   | 4104 (50.0)      | 227 (50.1) | 0.346   | 4057 (50.0)          | 274 (49.0) | 0.154   |
| Primary                                                 | 2482 (37.3)        | 69 (34.6)  |         | 2437 (37.3)      | 114 (36.2) |         | 2416 (37.3)          | 135 (37.1) |         |
| Secondary+                                              | 1529 (12.8)        | 37 (12.2)  |         | 1491 (12.7)      | 75 (13.7)  |         | 1481 (12.7)          | 85 (13.9)  |         |
| Husband occupation                                      |                    |            |         |                  |            |         |                      |            |         |
| Not employed                                            | 873 (7.7)          | 22 (6.6)   | 0.339   | 846 (7.6)        | 49 (7.7)   | 0.421   | 838 (7.6)            | 57 (7.4)   | 0.482   |
| Employed                                                | 7324 (92.3)        | 229 (93.4) |         | 7186 (92.4)      | 367 (92.3) |         | 7116 (92.4)          | 437 (92.6) |         |
| Wealth                                                  |                    |            |         |                  |            |         |                      |            |         |
| Poorest                                                 | 3238 (25.4)        | 109 (15.6) | 0.248   | 3163 (25.3)      | 184 (21.5) | 0.015   | 3118 (25.3)          | 229 (22.2) | <0.001  |
| Poorer                                                  | 1430 (23.4)        | 48 (22.5)  |         | 1400 (23.4)      | 78 (22.2)  |         | 1390 (23.5)          | 88 (21.3)  |         |
| Middle                                                  | 1167 (21.1)        | 36 (22.8)  |         | 1147 (21.3)      | 56 (20.0)  |         | 1136 (21.2)          | 67 (20.7)  |         |
| Richer                                                  | 1025 (17.8)        | 30 (24.8)  |         | 1000 (17.7)      | 55 (23.3)  |         | 993 (17.6)           | 62 (23.7)  |         |
| Richest                                                 | 1337 (12.3)        | 28 (14.3)  |         | 1322 (12.3)      | 43 (13.0)  |         | 1317 (12.3)          | 48 (12.1)  |         |

|    |                           |             |            |        |             |            |        |             |            |        |
|----|---------------------------|-------------|------------|--------|-------------|------------|--------|-------------|------------|--------|
| 1  |                           |             |            |        |             |            |        |             |            |        |
| 2  |                           |             |            |        |             |            |        |             |            |        |
| 3  |                           |             |            |        |             |            |        |             |            |        |
| 4  | Total number of preceding |             |            |        |             |            |        |             |            |        |
| 5  | child                     |             |            |        |             |            |        |             |            |        |
| 6  | ≤2                        | 2627 (31.0) | 57 (27.0)  | <0.001 | 2591 (31.0) | 93 (27.1)  | <0.001 | 2575 (31.1) | 109 (26.4) | <0.001 |
| 7  | 3-4                       | 2561 (30.6) | 77 (22.0)  |        | 2505 (30.7) | 133 (23.6) |        | 2482 (30.7) | 156 (24.6) |        |
| 8  | ≥5                        | 3009 (38.4) | 117 (50.9) |        | 2936 (38.2) | 190 (49.3) |        | 2897 (38.2) | 229 (49.0) |        |
| 9  | Residence                 |             |            |        |             |            |        |             |            |        |
| 10 | Urban                     | 1264 (8.8)  | 22 (12.0)  | 0.004  | 1251 (8.9)  | 35 (8.7)   | <0.001 | 1248 (9.0)  | 38 (7.7)   | <0.001 |
| 11 | Rural                     | 6933 (91.2) | 229 (88.0) |        | 6781 (91.1) | 381 (91.3) |        | 6706 (91.0) | 456 (92.3) |        |
| 12 |                           |             |            |        |             |            |        |             |            |        |
| 13 | Region                    |             |            |        |             |            |        |             |            |        |
| 14 | Tigray                    | 765 (6.0)   | 23 (6.1)   | 0.516  | 762 (6.1)   | 26 (4.1)   | 0.145  | 752 (6.1)   | 36 (5.3)   | 0.039  |
| 15 | Afar                      | 808 (1.0)   | 20 (0.7)   |        | 779 (1.0)   | 49 (1.2)   |        | 762 (1.0)   | 66 (1.4)   |        |
| 16 | Amhara                    | 774 (18.7)  | 26 (22.2)  |        | 765 (18.8)  | 35 (17.9)  |        | 761 (18.9)  | 39 (17.2)  |        |
| 17 | Oromia                    | 1270 (44.7) | 37 (45.5)  |        | 1245 (44.6) | 62 (47.9)  |        | 1235 (44.6) | 72 (47.1)  |        |
| 18 | Somali                    | 1231(5.0)   | 52 (6.3)   |        | 1210 (4.9)  | 73 (5.4)   |        | 1203 (4.9)  | 80 (5.1)   |        |
| 19 | Benishangul-Gumuz         | 711 (1.1)   | 24 (1.0)   |        | 690 (1.1)   | 45 (1.3)   |        | 682 (1.1)   | 53 (1.4)   |        |
| 20 | SNNPR***                  | 1021 (21.2) | 23 (16.0)  |        | 995 (21.1)  | 49 (20.4)  |        | 987 (21.1)  | 57 (20.9)  |        |
| 21 | Gambella,                 | 541 (0.2)   | 16 (0.2)   |        | 531 (0.2)   | 26 (0.2)   |        | 522 (0.2)   | 35 (0.2)   |        |
| 22 | Harari                    | 443 (0.2)   | 13 (0.2)   |        | 429 (0.2)   | 27 (0.2)   |        | 427 (0.2)   | 29 (0.2)   |        |
| 23 | Addis Ababa               | 246 (1.5)   | 6 (1.2)    |        | 245 (1.5)   | 7 (1.0)    |        | 245 (1.5)   | 7 (0.8)    |        |
| 24 | Dire Dawa                 | 387 (0.4)   | 11 (0.4)   |        | 381(0.4)    | 17 (0.4)   |        | 378 (0.4)   | 20 (0.4)   |        |
| 25 |                           |             |            |        |             |            |        |             |            |        |
| 26 | Access to mass media      |             |            |        |             |            |        |             |            |        |
| 27 | Yes                       | 1408 (15.8) | 36 (23.2)  | 0.240  | 1383 (15.9) | 61 (20.2)  | 0.177  | 1376 (15.9) | 68 (19.0)  | 0.043  |
| 28 | No                        | 6789 (84.2) | 215 (76.8) |        | 6649 (84.1) | 355 (79.8) |        | 6578 (84.1) | 426 (81.0) |        |
| 29 |                           |             |            |        |             |            |        |             |            |        |
| 30 | Decision making autonomy  |             |            |        |             |            |        |             |            |        |
| 31 | Yes                       | 6014 (77.7) | 179 (74.9) | 0.469  | 5898 (77.8) | 295 (73.8) | 0.258  | 5848        | 345        | 0.072  |
| 32 | No                        | 2183 (22.3) | 72 (25.1)  |        | 2134 (22.2) | 121 (26.2) |        | 2106        | 149        |        |
| 33 |                           |             |            |        |             |            |        |             |            |        |
| 34 |                           |             |            |        |             |            |        |             |            |        |

237 \*\*\*SNNPR= Southern Nations, Nationalities, and Peoples' Region; EDHS= Ethiopia Demographic and Health Survey

## 238 **Balance diagnostics**

## 239 **Propensity score balance**

240 Figure 3 presents the density plot of women in the treatment group (dashed lines) and the  
241 control group (solid lines) before and after weighting. It reveals that an adequate balance of  
242 the propensity score distribution between the treatment groups after weighting (Figure 3).

## 243 **Covariate balance**

244 After weighting adjustment, standardized differences of covariates were all less than 0.1 (10%),  
245 showing comparability between women with and without short birth interval  
246 (Supplementary Material II).

## 247 **Treatment effect estimation**

248 The prevalence of short birth interval in Ethiopia was 45.8% (95% CI: 42.91–48.62). Table 2  
249 presents the estimated effects of short birth interval on neonatal, infant, and under-five  
250 mortality. The adjusted estimated odds of neonatal mortality were 85% higher among women  
251 who experienced short birth interval (AOR=1.85, 95% CI=1.19, 2.89) than those who did not.  
252 Similarly, the odds of infant mortality were two times higher (AOR=2.16, 95% CI=1.49, 3.11)  
253 among women who experienced short birth interval compared with women who did not. The  
254 odds of under-five child mortality were two times (AOR=2.26, 95% CI= 1.60, 3.17) higher  
255 among women who were exposed to short birth interval compared with women who were not.

256



258 **Table 2** The effect of short birth interval on neonatal, infant, and under-five mortality in  
 259 Ethiopia, EDHS 2016

| Treatment variable   | Neonatal mortality   |            | AOR (95% CI)      |
|----------------------|----------------------|------------|-------------------|
|                      | No (%)*              | Yes (%)*   |                   |
| Short birth interval |                      |            |                   |
| No                   | 4166 (54.5)          | 95 (46.1)  | Ref               |
| Yes                  | 4031 (45.5)          | 156 (53.9) | 1.85 (1.19, 2.89) |
|                      |                      |            |                   |
|                      | Infant mortality     |            |                   |
| Short birth interval | No (%)               | Yes (%)    |                   |
| No                   | 4126 (54.9)          | 135 (40.5) | Ref               |
| Yes                  | 3906 (45.1)          | 281 (59.5) | 2.16 (1.49, 3.11) |
|                      |                      |            |                   |
|                      | Under-Five mortality |            |                   |
| Short Birth interval | No (%)               | Yes (%)    |                   |
| No                   | 4099 (55.1)          | 162 (39.3) | Ref               |
| Yes                  | 3855 (44.9)          | 332 (60.7) | 2.26 (1.60, 3.17) |

260 EDHS= Ethiopia Demographic and Health Survey; AOR= Adjusted Odds Ratio; CI=  
 261 Confidence Interval; Ref= reference group; (%)\*=percentage are weighted

## 262 Discussion

263 To our knowledge, this study provides the first comprehensive assessment of the effect of short  
 264 birth interval on neonatal, infant, and under-five mortality using the WHO recommendation to  
 265 define short birth interval and applying rigorous analytical techniques to adjust for potential  
 266 confounders. This study provides evidence that short birth interval is associated with  
 267 neonatal, infant, and under-five mortality in Ethiopia. These findings will help policy  
 268 makers and program planners formulate targeted interventions to increase birth intervals and  
 269 contribute to achieving the GTPE and SDGs target of reducing neonatal, infant, and under-  
 270 five mortality.<sup>16 15</sup>

271 In this current study, short birth interval was found to be associated with higher odds of  
 272 neonatal mortality. This finding is consistent with evidence from the previous studies<sup>23 25 63-</sup>  
 273 <sup>66</sup> which have shown a higher risk of neonatal mortality among women with a short birth  
 274 interval. However, the definition of short birth interval (i.e., <33 months) used in the current

1  
2  
3 275 study was in line with the WHO definition and longer than those used in previous studies (i.e.,  
4  
5 276 ranges from <18 to 24 months). Short birth interval could result in adverse neonatal child health  
6  
7  
8 277 outcomes, such as death, by causing maternal nutritional depletion, specifically folate  
9  
10 278 depletion.<sup>67 68</sup> The maternal nutritional depletion hypothesis states that a short birth-to-  
11  
12 279 pregnancy/birth interval worsens the mother's nutritional status because of inadequate time to  
13  
14 280 recover from the physiological stresses of the subsequent pregnancy.<sup>69</sup> This may compromise  
15  
16 281 maternal nutritional status and ability to support fetal growth, which could result in fetal  
17  
18 282 malnutrition and increased risk of infection and death during childhood.<sup>67</sup> Women with short  
19  
20 283 birth interval may also be less likely to attend postnatal care, which is vital for early detection  
21  
22 284 and treatment of neonatal and maternal health problems. Evidence has shown that the majority  
23  
24 285 of mothers and newborns in low- and middle-income countries do not receive optimal postnatal  
25  
26 286 care<sup>70</sup>, yet close to half of the newborn deaths occurred within the first 24 hours after birth, a  
27  
28  
29 287 critical time where mothers and their babies should get their first postnatal care.<sup>71</sup>  
30  
31  
32  
33 288 Our study found that infant mortality was two times higher among women who experienced  
34  
35 289 short birth interval compared with women who did not. Our finding was consistent with  
36  
37 290 evidence from Ethiopia,<sup>18 32</sup> Kenya,<sup>72 73</sup> Nepal,<sup>74</sup> and Iran<sup>75</sup> although the cut-off point for  
38  
39 291 short birth interval in the current study was longer than the previous studies. The  
40  
41 292 abovementioned previous studies also documented that the risk of infant mortality was  
42  
43 293 higher among women who experienced short birth interval compared with women who did  
44  
45 294 not. One of the possible reasons for the effect of short birth interval on infant mortality could  
46  
47 295 be low maternal motivation to breastfeed (for example, if the pregnancy was unintended).<sup>76</sup>  
48  
49 296 Maternal perception of being undernourished due to a short birth interval may also influence  
50  
51 297 her infant feeding choices, such as the duration and intensity of breastfeeding and  
52  
53 298 supplemental feeding of the infant. This could in turn affect infants' nutritional status, their  
54  
55  
56  
57  
58  
59  
60

1  
2  
3 299 resistance to infection, and may expose them to death.<sup>76-79</sup> The abovementioned links  
4  
5 300 between short birth interval and neonatal mortality also apply to infant mortality.  
6  
7

8 301 Short birth interval doubled the odds of under-five mortality compared with non-short birth  
9  
10 302 interval. Despite not using the WHO recommendation<sup>1</sup> of less than 33 months to define short  
11  
12 303 birth interval, the existing literature<sup>24 30 63 64 80</sup> also supported our finding. The likely mechanism  
13  
14 304 through which short birth interval affects under-five mortality could be competition between  
15  
16 305 closely spaced siblings for limited household resources, maternal attention, and cross-  
17  
18 306 infection.<sup>76</sup> Moreover, children born within a short birth interval may not receive their  
19  
20 307 vaccination at all or complete their booster series, which is one of the risk factors that  
21  
22 308 exposed children to the infectious disease and its associated death.<sup>81-83</sup> Women with short  
23  
24 309 birth interval could be burdened with caring for highly dependent children<sup>77</sup> and other  
25  
26 310 domestic activities. As a result, they may lack the time and motivation to take children to  
27  
28 311 the health facility for vaccination and other services.  
29  
30  
31  
32

33  
34 312 The results of this study need to be interpreted within the limitations of the observational  
35  
36 313 study design. Due to the cross-sectional nature of the study, temporal associations between  
37  
38 314 short birth interval and neonatal, infant, and under-five mortality may not be established.  
39  
40 315 The second limitation of our study could be associated with the nonrandomized design of  
41  
42 316 the study. Propensity scores based analysis, IPTW, cannot account for unknown confounders  
43  
44 317 in the same way that a randomised trial can. As a result, the effect of residual confounders  
45  
46 318 may not be avoided. However, the application of IPTW mimics a randomized clinical trial  
47  
48 319 by matching two comparison groups using a conditional probability of receiving exposure  
49  
50 320 (short birth interval in this case) given a set of covariates. The study has also additional  
51  
52 321 strengths, such as using data from a nationally representative survey with large sample size.  
53  
54 322 The application of DAGs,<sup>48 49 84</sup> a graphical tool used to identify minimum adjustment sets,  
55  
56  
57  
58  
59  
60

1  
2  
3 323 which defined the set of explanatory variables for the propensity scores model was another  
4  
5 324 strength of this study.  
6  
7

## 8 325 **Conclusion**

9  
10  
11  
12 326 This study provides evidence that short birth interval has a significant effect on neonatal,  
13  
14 327 infant, and under-five mortality in Ethiopia. Interventions aiming to reduce neonatal, infant,  
15  
16 328 and under-five mortality in Ethiopia should target the prevention of short birth interval.  
17  
18 329 These could be achieved through creating awareness of the optimum birth interval and the  
19  
20 330 negative impacts of shorter birth intervals on the health of children. Further expanding the  
21  
22 331 availability and accessibility of family planning services also help women achieve optimum  
23  
24 332 birth interval. Birth interval counseling as per the WHO recommendation should be  
25  
26 333 integrated into the maternal and child health services as part of the child survival  
27  
28 334 intervention.  
29  
30  
31  
32

## 33 335 **Author affiliations**

34  
35  
36  
37 336 <sup>1</sup> Saint Paul's Hospital Millennium Medical College, Addis Ababa, Ethiopia

38  
39  
40 337 <sup>2</sup>Centre for Women's Health Research, School of Medicine and Public Health, University of  
41  
42  
43 338 Newcastle, Newcastle, New South Wales, Australia

44  
45  
46 339 <sup>3</sup>Centre for Clinical Epidemiology and Biostatistics, School of Medicine and Public Health,  
47  
48 340 University of Newcastle, Newcastle, New South Wales, Australia  
49  
50

## 51 341 **Acknowledgment**

52  
53  
54  
55 342 We are grateful to The DHS Program for allowing us to use the Ethiopia Demographic and  
56  
57 343 Health Survey (EDHS) data for further analysis.  
58  
59  
60

## 344 **Contributors**

345 All authors (DMS, CC, EGH, and DL) contributed to the design of the study and the  
346 interpretation of data. DMS performed the data analysis and drafted the manuscript. All  
347 authors (DMS, CC, EGH, and DL) read, critically revised, and approved the final  
348 manuscript.

## 349 **Funding**

350 The authors received no specific funding for this work.

## 351 **Competing interests**

352 The authors declare that they have no competing interests.

## 353 **Ethics approval**

354 The 2016 EDHS was approved by the National Research Ethics Review Committee of  
355 Ethiopia (NRERC) and ICF Macro International. Permission from The DHS Program was  
356 obtained to use the 2016 EDHS data for further analysis. This analysis was also approved  
357 by The University of Newcastle Human Research Ethics Committee (H-2018-0332).

## 358 **Consent for publication**

359 Not required

## 360 **Provenance and peer review**

361 Not commissioned; externally peer reviewed.

## 362 **Data availability statement**

1  
2  
3 363 The dataset is available from The DHS Program repository at the following link:  
4  
5 364 [https://www.dhsprogram.com/data/dataset/Ethiopia\\_Standard-DHS\\_2016.cfm?flag=0](https://www.dhsprogram.com/data/dataset/Ethiopia_Standard-DHS_2016.cfm?flag=0).  
6  
7  
8

## 9 365 **References**

- 10  
11  
12 366 1. World Health Organization. Report of a WHO Technical Consultation on Birth Spacing.  
13  
14  
15 367 *Geneva, Switzerland* 13-15 June 2005.
- 16  
17 368 2. Shifti DM, Chojenta C, G. Holliday E, et al. Individual and community level determinants  
18  
19 369 of short birth interval in Ethiopia: A multilevel analysis. *PloS one*  
20  
21 370 2020;15(1):e0227798.
- 22  
23  
24 371 3. Shifti DM, Chojenta C, Holliday EG, et al. Application of geographically weighted  
25  
26 372 regression analysis to assess predictors of short birth interval hot spots in Ethiopia. *PloS*  
27  
28 373 *one* 2020;15(5):e0233790.
- 29  
30  
31 374 4. Shifti DM, Chojenta C, Holliday EG, et al. Socioeconomic inequality in short birth interval  
32  
33 375 in Ethiopia: a decomposition analysis. *BMC public health* 2020;20(1):1-13.
- 34  
35 376 5. Central Statistical Agency (CSA) [Ethiopia] and ICF. Ethiopia Demographic and Health  
36  
37 377 Survey 2016. *Addis Ababa, Ethiopia, and Rockville, Maryland, USA: CSA and ICF*  
38  
39 378 2016.
- 40  
41  
42 379 6. Grisaru-Granovsky S, Gordon E-S, Haklai Z, et al. Effect of interpregnancy interval on  
43  
44 380 adverse perinatal outcomes-a national study. *Contraception* 2009;80(6):512-18.
- 45  
46  
47 381 7. Adam I, Ismail MH, Nasr AM, et al. Low birth weight, preterm birth and short  
48  
49 382 interpregnancy interval in Sudan. *The Journal of Maternal-Fetal & Neonatal Medicine*  
50  
51 383 2009;22(11):1068-71.
- 52  
53  
54 384 8. Chen I, Jhangri GS, Chandra S. Relationship between interpregnancy interval and congenital  
55  
56 385 anomalies. *American journal of obstetrics and gynecology* 2014;210(6):564. e1-8.  
57  
58  
59  
60

- 1  
2  
3 386 9. Kwon S, Lazo-Escalante M, Villaran M, et al. Relationship between interpregnancy interval  
4  
5 387 and birth defects in Washington State. *Journal of Perinatology* 2012;32(1):45.  
6  
7  
8 388 10. Cheslack-Postava K, Liu K, Bearman PS. Closely spaced pregnancies are associated with  
9  
10 389 increased odds of autism in California sibling births. *Pediatrics* 2011;127:246-53.  
11  
12 390 11. DaVanzo J, Razzaque A, Rahman M, et al. The effects of birth spacing on infant and child  
13  
14 391 mortality, pregnancy outcomes, and maternal morbidity and mortality in Matlab,  
15  
16 392 Bangladesh. *Technical Consultation and Review of the Scientific Evidence for Birth*  
17  
18 393 *Spacing* 2004.  
19  
20  
21 394 12. DaVanzo J, Hale L, Razzaque A, et al. Effects of interpregnancy interval and outcome of  
22  
23 395 the preceding pregnancy on pregnancy outcomes in Matlab, Bangladesh. *BJOG: An*  
24  
25 396 *International Journal of Obstetrics & Gynaecology* 2007;114(9):1079-87.  
26  
27  
28 397 13. Gonzalez RM, Gilleskie D. Infant mortality rate as a measure of a country's health: a robust  
29  
30 398 method to improve reliability and comparability. *Demography* 2017;54(2):701-20.  
31  
32  
33 399 14. Reidpath DD, Allotey P. Infant mortality rate as an indicator of population health. *Journal*  
34  
35 400 *of Epidemiology & Community Health* 2003;57(5):344-46.  
36  
37  
38 401 15. UN. Transforming our World: The 2030 Agenda For Sustainable Development Goal  
39  
40 402 (A/RES/70/1). 2015.  
41  
42 403 16. National Planning Commission. Federal Democratic Republic of Ethiopia: Growth and  
43  
44 404 Transformation Plan II (GTP II) (2015/16-2019/20). *Addis Ababa, Ethiopia* 2016.  
45  
46  
47 405 17. Ethiopian Public Health Institute (EPHI) [Ethiopia] and ICF. Ethiopia Mini Demographic  
48  
49 406 and Health Survey 2019: Key Indicators. *Rockville, Maryland, USA: EPHI and ICF*  
50  
51 407 2019.  
52  
53  
54 408 18. Abate MG, Angaw DA, Shaweno T. Proximate determinants of infant mortality in Ethiopia,  
55  
56 409 2016 Ethiopian demographic and health surveys: results from a survival analysis.  
57  
58 410 *Archives of Public Health* 2020;78(1):1-10.  
59  
60

- 1  
2  
3 411 19. Weldearegawi B, Melaku YA, Abera SF, et al. Infant mortality and causes of infant deaths  
4  
5 412 in rural Ethiopia: a population-based cohort of 3684 births. *BMC public health*  
6  
7 413 2015;15(1):770.  
8  
9  
10 414 20. Wolde HF, Gonete KA, Akalu TY, et al. Factors affecting neonatal mortality in the general  
11  
12 415 population: evidence from the 2016 Ethiopian Demographic and Health Survey  
13  
14 416 (EDHS)—multilevel analysis. *BMC research notes* 2019;12(1):610.  
15  
16  
17 417 21. Roro EM, Tumtu MI, Gebre DS. Predictors, causes, and trends of neonatal mortality at  
18  
19 418 Nekemte Referral Hospital, east Wollega Zone, western Ethiopia (2010–2014).  
20  
21 419 Retrospective cohort study. *PloS one* 2019;14(10):e0221513.  
22  
23  
24 420 22. Seid SS, Ibro SA, Ahmed AA, et al. Causes and factors associated with neonatal mortality  
25  
26 421 in neonatal intensive care unit (NICU) of Jimma University medical center, Jimma,  
27  
28 422 south West Ethiopia. *Pediatric health, medicine and therapeutics* 2019;10:39.  
29  
30  
31 423 23. Wakgari N, Wencheke E. Risk factors of neonatal mortality in Ethiopia. *Ethiopian Journal*  
32  
33 424 *of Health Development* 2013;27(3):192-99.  
34  
35  
36 425 24. Fikru C, Getnet M, Shaweno T. Proximate Determinants of Under-Five Mortality in  
37  
38 426 Ethiopia: Using 2016 Nationwide Survey Data. *Pediatric Health, Medicine and*  
39  
40 427 *Therapeutics* 2019;10:169.  
41  
42  
43 428 25. Mekonnen Y, Tensou B, Telake DS, et al. Neonatal mortality in Ethiopia: trends and  
44  
45 429 determinants. *BMC public health* 2013;13(1):483.  
46  
47  
48 430 26. Limaso AA, Dangisso MH, Hibstu DT. Neonatal survival and determinants of mortality in  
49  
50 431 Aroresa district, Southern Ethiopia: a prospective cohort study. *BMC pediatrics*  
51  
52 432 2020;20(1):33.  
53  
54 433 27. Yaya Y, Eide KT, Norheim OF, et al. Maternal and neonatal mortality in south-west  
55  
56 434 Ethiopia: estimates and socio-economic inequality. *PloS one* 2014;9(4):e96294.  
57  
58  
59  
60



- 1  
2  
3 435 28. Gebretsadik S, Gabreyohannes E. Determinants of under-five mortality in high mortality  
4  
5 436 regions of Ethiopia: an analysis of the 2011 Ethiopia Demographic and Health Survey  
6  
7 437 data. *International Journal of Population Research* 2016;2016.  
8  
9  
10 438 29. Negera A, Abelti G, Bogale T, et al. An analysis of the trends, differentials and key  
11  
12 439 proximate determinants of infant and under-five mortality in Ethiopia. Further Analysis  
13  
14 440 of the 2000, 2005, and 2011 Demographic and Health Surveys. . *DHS Further Analysis*  
15  
16 441 *Reports No 79 Calverton, Maryland, USA: ICF International* 2013.  
17  
18  
19 442 30. Laelago T. Effects of preceding birth intervals on child mortality in Ethiopia; Evidence  
20  
21 443 from the Demographic and Health Surveys, 2016. *Epidemiology International Journal*  
22  
23 444 2019;3(1).  
24  
25  
26 445 31. Hailemariam A, Tesfaye M. Determinants of infant and early childhood mortality in a small  
27  
28 446 urban community of Ethiopia: a hazard model analysis. *The Ethiopian Journal of*  
29  
30 447 *Health Development (EJHD)* 1997;11(3).  
31  
32  
33 448 32. Dadi AF. A systematic review and meta-analysis of the effect of short birth interval on  
34  
35 449 infant mortality in Ethiopia. *PloS one* 2015;10(5):e0126759.  
36  
37  
38 450 33. Sahle-Mariam Y, Berhane Y. Neonatal mortality among hospital delivered babies in Addis  
39  
40 451 Ababa, Ethiopia. *The Ethiopian Journal of Health Development (EJHD)* 1997;11(3).  
41  
42  
43 452 34. Kolobo HA, Chaka TE, Kassa RT. Determinants of neonatal mortality among newborns  
44  
45 453 admitted to neonatal intensive care unit Adama, Ethiopia: A case-control study.  
46  
47 454 *Journal of Clinical Neonatology* 2019;8(4):232.  
48  
49  
50 455 35. Bogale TN, Worku AG, Bikis GA, et al. Why gone too soon? Examining social  
51  
52 456 determinants of neonatal deaths in northwest Ethiopia using the three delay model  
53  
54 457 approach. *BMC pediatrics* 2017;17(1):216.  
55  
56  
57 458 36. Woldeamanuel BT. Statistical analysis of neonatal mortality: a case study of Ethiopia.  
58  
59 459 *Journal of Pregnancy and Child Health* 2018;5(2):1-11.  
60

- 1  
2  
3 460 37. Asefa M, Drewett R, Tessema F. A birth cohort study in South-West Ethiopia to identify  
4  
5 461 factors associated with infant mortality that are amenable for intervention. *Ethiopian*  
6  
7 462 *Journal of Health Development* 2000;14(2):161-68.
- 8  
9  
10 463 38. Muluye S, Wencheke E. Determinants of infant mortality in Ethiopia: A study based on the  
11  
12 464 2005 EDHS data. *Ethiopian Journal of Health Development* 2012;26(2):72-77.
- 13  
14  
15 465 39. Deribew A, Tessema F, Girma B. Determinants of under-five mortality in Gilgel gibe field  
16  
17 466 research center, Southwest Ethiopia. *Ethiopian Journal of Health Development*  
18  
19 467 2007;21(2):117-24.
- 20  
21 468 40. Bedada D. Determinant of under-five child mortality in Ethiopia. *American Journal of*  
22  
23 469 *Theoretical and Applied Statistics* 2017;6(4):198-204.
- 24  
25  
26 470 41. Ayele DG, Zewotir TT. Comparison of under-five mortality for 2000, 2005 and 2011  
27  
28 471 surveys in Ethiopia. *BMC public health* 2016;16(1):930.
- 29  
30  
31 472 42. Shamebo D, Sandström A, Muhe L, et al. The Butajira project in Ethiopia: a nested case-  
32  
33 473 referent study of under-five mortality and its public health determinants. *Bulletin of the*  
34  
35 474 *World Health Organization* 1993;71(3-4):389.
- 36  
37  
38 475 43. Croft TN, Aileen M. J. Marshall, Courtney K. Allen, et al. Guide to DHS Statistics.  
39  
40 476 *Rockville, Maryland, USA: ICF* 2018.
- 41  
42 477 44. ICF International. Demographic and Health Survey Interviewer's Manual. *MEASURE DHS*  
43  
44 478 *Basic Documentation No 2 Calverton, Maryland, USA: ICF International* 2012.
- 45  
46  
47 479 45. Hailu D, Gulte T. Determinants of Short Interbirth Interval among Reproductive Age  
48  
49 480 Mothers in Arba Minch District, Ethiopia. *International journal of reproductive*  
50  
51 481 *medicine* 2016;2016 doi: 10.1155/2016/6072437
- 52  
53  
54 482 46. Yohannes S, Wondafrash M, Abera M, et al. Duration and determinants of birth interval  
55  
56 483 among women of child bearing age in Southern Ethiopia. *BMC pregnancy and*  
57  
58 484 *childbirth* 2011;11(1):38.
- 59  
60

- 1  
2  
3 485 47. Textor J, van der Zander B, Gilthorpe MS, et al. Robust causal inference using directed  
4  
5 486 acyclic graphs: the R package ‘dagitty’. *International journal of epidemiology*  
6  
7 487 2016;45(6):1887-94.  
8  
9  
10 488 48. Attia JR, Oldmeadow C, Holliday EG, et al. Deconfounding confounding part 2: using  
11  
12 489 directed acyclic graphs (DAGs). *Medical Journal of Australia* 2017;206(11):480-83.  
13  
14 490 49. Shrier I, Platt RW. Reducing bias through directed acyclic graphs. *BMC medical research*  
15  
16 491 *methodology* 2008;8(1):70.  
17  
18 492 50. Garrido MM, Kelley AS, Paris J, et al. Methods for constructing and assessing propensity  
19  
20 493 scores. *Health services research* 2014;49(5):1701-20.  
21  
22 494 51. Xu S, Ross C, Raebel MA, et al. Use of stabilized inverse propensity scores as weights to  
23  
24 495 directly estimate relative risk and its confidence intervals. *Value in Health*  
25  
26 496 2010;13(2):273-77.  
27  
28 497 52. Lee Y, Hong I, Lee MJ, et al. Identifying risk of depressive symptoms in adults with  
29  
30 498 physical disabilities receiving rehabilitation services: Propensity score approaches.  
31  
32 499 *Annals of rehabilitation medicine* 2019;43(3):250.  
33  
34 500 53. Austin PC, Mamdani MM. A comparison of propensity score methods: a case-study  
35  
36 501 estimating the effectiveness of post-AMI statin use. *Statistics in medicine*  
37  
38 502 2006;25(12):2084-106.  
39  
40 503 54. Rosenbaum PR, Rubin DB. The central role of the propensity score in observational studies  
41  
42 504 for causal effects. *Biometrika* 1983;70(1):41-55.  
43  
44 505 55. Austin PC. A tutorial and case study in propensity score analysis: an application to  
45  
46 506 estimating the effect of in-hospital smoking cessation counseling on mortality.  
47  
48 507 *Multivariate behavioral research* 2011;46(1):119-51.  
49  
50 508 56. Guo S, Fraser MW. Propensity score analysis: Statistical methods and applications: SAGE  
51  
52 509 publications 2014.  
53  
54  
55  
56  
57  
58  
59  
60

- 1  
2  
3 510 57. Deb S, Austin PC, Tu JV, et al. A review of propensity-score methods and their use in  
4  
5 511 cardiovascular research. *Canadian Journal of Cardiology* 2016;32(2):259-65.  
6  
7  
8 512 58. Austin PC. An introduction to propensity score methods for reducing the effects of  
9  
10 513 confounding in observational studies. *Multivariate behavioral research*  
11  
12 514 2011;46(3):399-424.  
13  
14  
15 515 59. Austin PC, Stuart EA. Moving towards best practice when using inverse probability of  
16  
17 516 treatment weighting (IPTW) using the propensity score to estimate causal treatment  
18  
19 517 effects in observational studies. *Statistics in medicine* 2015;34(28):3661-79.  
20  
21  
22 518 60. Austin PC. Balance diagnostics for comparing the distribution of baseline covariates  
23  
24 519 between treatment groups in propensity-score matched samples. *Statistics in medicine*  
25  
26 520 2009;28(25):3083-107.  
27  
28  
29 521 61. Rosenbaum PR, Rubin DB. Constructing a control group using multivariate matched  
30  
31 522 sampling methods that incorporate the propensity score. *The American Statistician*  
32  
33 523 1985;39(1):33-38.  
34  
35  
36 524 62. DuGoff EH, Schuler M, Stuart EA. Generalizing observational study results: applying  
37  
38 525 propensity score methods to complex surveys. *Health services research*  
39  
40 526 2014;49(1):284-303.  
41  
42  
43 527 63. Rutstein SO. Effects of preceding birth intervals on neonatal, infant and under-five years  
44  
45 528 mortality and nutritional status in developing countries: evidence from the demographic  
46  
47 529 and health surveys. *International Journal of Gynecology & Obstetrics* 2005;89:S7-S24.  
48  
49  
50 530 64. Kozuki N, Walker N. Exploring the association between short/long preceding birth  
51  
52 531 intervals and child mortality: using reference birth interval children of the same mother  
53  
54 532 as comparison. *BMC public health* 2013;13(S3):S6.  
55  
56  
57 533 65. Rahman MM, Abidin S. Factors affecting neonatal mortality in Bangladesh. *Journal of*  
58  
59 534 *Health Management* 2010;12(2):137-52.  
60

- 1  
2  
3 535 66. Ezeh OK, Agho KE, Dibley MJ, et al. Determinants of neonatal mortality in Nigeria:  
4  
5 536 evidence from the 2008 demographic and health survey. *BMC Public Health*  
6  
7 537 2014;14(1):521.  
8  
9  
10 538 67. Conde-Agudelo A, Rosas-Bermudez A, Castaño F, et al. Effects of birth spacing on  
11  
12 539 maternal, perinatal, infant, and child health: a systematic review of causal mechanisms.  
13  
14 540 *Studies in family planning* 2012;43(2):93-114.  
15  
16  
17 541 68. Rousso D, Panidis D, Gkoutzioulis F, et al. Effect of the interval between pregnancies on  
18  
19 542 the health of mother and child. *European Journal of Obstetrics and Gynecology and*  
20  
21 543 *Reproductive Biology* 2002;105(1):4-6.  
22  
23  
24 544 69. King JC. The risk of maternal nutritional depletion and poor outcomes increases in early or  
25  
26 545 closely spaced pregnancies. *The Journal of nutrition* 2003;133(5):1732S-36S.  
27  
28  
29 546 70. WHO. Maternal, newborn, child and adolescent health: Postnatal care. [cited 11 July  
30  
31 547 2020]. Available from:  
32  
33 548 [https://www.who.int/maternal\\_child\\_adolescent/topics/newborn/postnatal\\_care/en/](https://www.who.int/maternal_child_adolescent/topics/newborn/postnatal_care/en/)  
34  
35 549 accessed 2020 11 July  
36  
37  
38 550 71. WHO, USAID, MCHIP, et al. Postnatal Care for Mothers and Newborns: Highlights from  
39  
40 551 the World Health Organization 2013 Guidelines. . 2015  
41  
42 552 72. Omariba DWR, Beaujot R, Rajulton F. Determinants of infant and child mortality in Kenya:  
43  
44 553 an analysis controlling for frailty effects. *Population Research and Policy Review*  
45  
46 554 2007;26(3):299-321.  
47  
48  
49 555 73. Fotso JC, Cleland J, Mberu B, et al. Birth spacing and child mortality: an analysis of  
50  
51 556 prospective data from the Nairobi urban health and demographic surveillance system.  
52  
53 557 *Journal of biosocial science* 2013;45(6):779-98.  
54  
55  
56  
57  
58  
59  
60

- 1  
2  
3 558 74. Lamichhane R, Zhao Y, Paudel S, et al. Factors associated with infant mortality in Nepal:  
4  
5 559 a comparative analysis of Nepal demographic and health surveys (NDHS) 2006 and  
6  
7 560 2011. *BMC public health* 2017;17(1):53.
- 8  
9  
10 561 75. SHARIFZADEH GR, Namakin K, Mehrjoufard H. An Epidemiological study on Infant  
11  
12 562 Mortality and factors affecting it in Rural Areas of Birjand, Iran. 2008.
- 13  
14  
15 563 76. Boerma JT, Bicego GT. Preceding birth intervals and child survival: searching for pathways  
16  
17 564 of influence. *Studies in family planning* 1992;23(4):243-56.
- 18  
19 565 77. Dewey KG, Cohen RJ. Does birth spacing affect maternal or child nutritional status? A  
20  
21 566 systematic literature review. *Maternal & child nutrition* 2007;3(3):151-73.
- 22  
23  
24 567 78. Stuebe A. The risks of not breastfeeding for mothers and infants. *Reviews in obstetrics and*  
25  
26 568 *gynecology* 2009;2(4):222.
- 27  
28  
29 569 79. Victora CG, Bahl R, Barros AJ, et al. Breastfeeding in the 21st century: epidemiology,  
30  
31 570 mechanisms, and lifelong effect. *The Lancet* 2016;387(10017):475-90.
- 32  
33 571 80. Biradar R, Patel KK, Prasad JB. Effect of birth interval and wealth on under-5 child  
34  
35 572 mortality in Nigeria. *Clinical Epidemiology and Global Health* 2019;7(2):234-38.
- 36  
37  
38 573 81. Andre FE, Booy R, Bock HL, et al. Vaccination greatly reduces disease, disability, death  
39  
40 574 and inequity worldwide. *Bulletin of the World health organization* 2008;86:140-46.
- 41  
42 575 82. Innis BL, Snitbhan R, Kunasol P, et al. Protection against hepatitis A by an inactivated  
43  
44 576 vaccine. *Jama* 1994;271(17):1328-34.
- 45  
46  
47 577 83. Arevshatian L, Clements C, Lwanga S, et al. An evaluation of infant immunization in  
48  
49 578 Africa: is a transformation in progress? *Bulletin of the World Health Organization*  
50  
51 579 2007;85:449-57.
- 52  
53  
54 580 84. Attia JR, Jones MP, Hure A. Deconfounding confounding part 1: traditional explanations.  
55  
56 581 *The Medical Journal of Australia* 2017;206(6):244-45.
- 57  
58  
59 582

1  
2  
3  
4 583 **Figure Legend**  
5  
6

7 584 **Figure 1** Direct Acyclic Graph (DAG) used to select controlling variables  
8

9 585 M\_age\_atBirth\_chil= Maternal age at birth of the index child; M\_Edu= Maternal education;  
10

11 586 M\_Occu= Maternal Occupation; H\_Educ= Husband education; H\_Occup= Husband  
12

13 587 occupation; Birth\_wt=Birth weight; Total\_Prec\_child=Total number of preceding child;  
14

15 588 Respiratory\_infn= respiratory infection; Prev\_Chi\_Survival=Previous child survival;  
16

17 589 Multiple\_preg= Multiple pregnancy; ANC=Antenatal care; PNC=Postnatal care;  
18

19 590 TT\_vaccin=Tetanus toxoid vaccination status; SBI= Short birth interval; NM=Neonatal  
20

21 591 mortality; IM=Infant mortality; U5M=Under-five mortal  
22  
23  
24  
25

26 592 **Figure 2** Schematic presentation of the overall steps followed in the analysis  
27  
28

29 593 **Figure 3** Balance of propensity scores before and after weighting across treatment and  
30

31 594 comparison groups  
32

33 595 PS= propensity score  
34  
35  
36  
37  
38  
39  
40  
41  
42  
43  
44  
45  
46  
47  
48  
49  
50  
51  
52  
53  
54  
55  
56  
57  
58  
59  
60



Figure 1 Direct Acyclic Graph (DAG) used to select controlling variables

157x118mm (300 x 300 DPI)



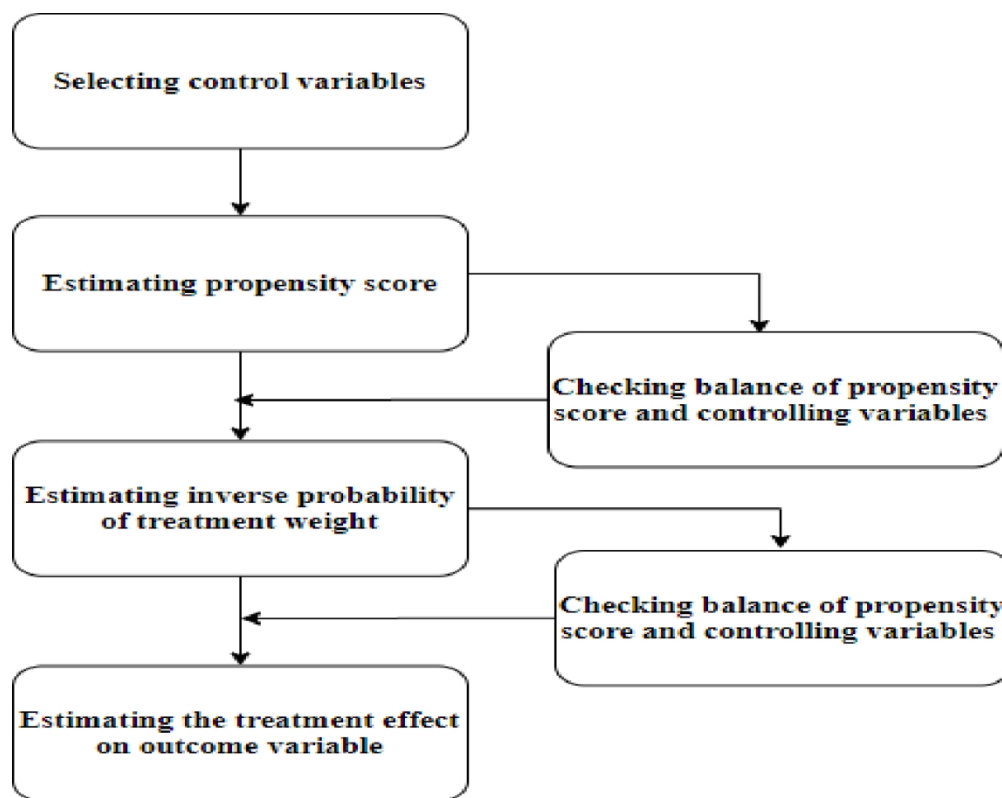

Figure 2 Schematic presentation of the overall steps followed in the analysis

115x90mm (300 x 300 DPI)

1  
2  
3  
4  
5  
6  
7  
8  
9  
10  
11  
12  
13  
14  
15  
16  
17  
18  
19  
20  
21  
22  
23  
24  
25  
26  
27  
28  
29  
30  
31  
32  
33  
34  
35  
36  
37  
38  
39  
40  
41  
42  
43  
44  
45  
46  
47  
48  
49  
50  
51  
52  
53  
54  
55  
56  
57  
58  
59  
60



Figure 3 Balance of propensity scores before and after weighting across treatment and comparison groups; PS=propensity score

165x87mm (300 x 300 DPI)

## Supplemental Material I

**Table 1** Variables included in Direct Acyclic Graph

| Category                                   | Variables                                           | Definition                                                                                                                                                                                                                                                                                                                                                                                                                                    |
|--------------------------------------------|-----------------------------------------------------|-----------------------------------------------------------------------------------------------------------------------------------------------------------------------------------------------------------------------------------------------------------------------------------------------------------------------------------------------------------------------------------------------------------------------------------------------|
| <b>Maternal background characteristics</b> | Maternal age at birth of the index child (in years) | Maternal age at birth of the index child, which was considered as a continuous variable. It was also categorized the descriptive section of the results (1= $\leq 19$ , 2= 20-24, 3=25-29, 4=30-34, and 5= $\geq 35$ ).                                                                                                                                                                                                                       |
|                                            | Educational level                                   | Maximum educational level (1= Uneducated, 2=Primary and 3=Secondary+)                                                                                                                                                                                                                                                                                                                                                                         |
|                                            | Employment status                                   | Maternal employment status (1=Not Employed; 2=Employed))                                                                                                                                                                                                                                                                                                                                                                                      |
|                                            | Place of residence                                  | Place of residence (1=Urban; 2=Rural)                                                                                                                                                                                                                                                                                                                                                                                                         |
|                                            | Region                                              | Region of residence (1=Tigray, 2=Afar, 3=Amhara, 4=Oromia, 5=Somali, 6=Benishangul-Gumuz, 7=SNNPR*, 8=Gambella, 9=Harari, 10=Addis Ababa, 11=Dire Dawa)<br>*SNNPR= Southern Nations, Nationalities, and Peoples' Region                                                                                                                                                                                                                       |
|                                            | Decision making autonomy                            | Coded as 'yes' if the women were involved in all decisions regarding their own health care, major household purchases and visits to her family or relatives (1=Yes, 2=No).                                                                                                                                                                                                                                                                    |
| <b>Husband background characteristics</b>  | Husband's education                                 | Maximum educational level of the husband (1= Uneducated, 2= Primary, 3= Secondary+)                                                                                                                                                                                                                                                                                                                                                           |
|                                            | Husband's occupation                                | 1= Not employed, 2=Employed                                                                                                                                                                                                                                                                                                                                                                                                                   |
| <b>Household characteristics</b>           | Access to media                                     | 1=Access to media, 2= Have no access to media                                                                                                                                                                                                                                                                                                                                                                                                 |
|                                            | Wealth index                                        | The wealth index provided with the dataset was used. DHS program provides a composite index of household amenities based on the principal component analysis (PCA) and classified the population into quintiles: (1st quintile (Poorest); 2nd quintile; 3rd quintile; 4th quintile and 5th quintile (Richest). A quintile is used as a measure of its relative socioeconomic level (i.e., 1=Poorest; 2=Poorer; 3=Middle; 4=Richer; 5=Richest) |

|                                                                |                                                      |                                                                                                                                                                                                                                                                                                                                                                                                                                                                                                                                                                                                                                                                                                                                                                                                                                                            |
|----------------------------------------------------------------|------------------------------------------------------|------------------------------------------------------------------------------------------------------------------------------------------------------------------------------------------------------------------------------------------------------------------------------------------------------------------------------------------------------------------------------------------------------------------------------------------------------------------------------------------------------------------------------------------------------------------------------------------------------------------------------------------------------------------------------------------------------------------------------------------------------------------------------------------------------------------------------------------------------------|
| <b>Maternal health status and healthcare-related variables</b> | Antenatal care                                       | Women’s antenatal care utilization categorized as 1=No visit, 2=At least one visit, 3= ≥ Four visits                                                                                                                                                                                                                                                                                                                                                                                                                                                                                                                                                                                                                                                                                                                                                       |
|                                                                | Place of delivery                                    | 1= Health facilities, 2=Home                                                                                                                                                                                                                                                                                                                                                                                                                                                                                                                                                                                                                                                                                                                                                                                                                               |
|                                                                | Postnatal care                                       | Women received check-up at least once within 48 hours after delivery by a skilled provider; categorized as 1=Yes, 2=No                                                                                                                                                                                                                                                                                                                                                                                                                                                                                                                                                                                                                                                                                                                                     |
|                                                                | TT vaccination                                       | Women received at least two doses of the immunization during pregnancy (1=Yes, 2=No)                                                                                                                                                                                                                                                                                                                                                                                                                                                                                                                                                                                                                                                                                                                                                                       |
| <b>Neonatal, infant and child characteristics</b>              | Sex                                                  | Child sex (1=Male, 2=Female)                                                                                                                                                                                                                                                                                                                                                                                                                                                                                                                                                                                                                                                                                                                                                                                                                               |
|                                                                | Multiple pregnancy                                   | 1=Yes, 2=No                                                                                                                                                                                                                                                                                                                                                                                                                                                                                                                                                                                                                                                                                                                                                                                                                                                |
|                                                                | Birth weight                                         | 1=Below average, 2=Average, 3=Above average                                                                                                                                                                                                                                                                                                                                                                                                                                                                                                                                                                                                                                                                                                                                                                                                                |
|                                                                | Mode of delivery                                     | 1= Caesarean section, 2= Non caesarean section                                                                                                                                                                                                                                                                                                                                                                                                                                                                                                                                                                                                                                                                                                                                                                                                             |
|                                                                | Survival status of the preceding child               | 1= Yes, 2=No                                                                                                                                                                                                                                                                                                                                                                                                                                                                                                                                                                                                                                                                                                                                                                                                                                               |
|                                                                | Total number of children born before the index child | Total number of children born before the index child was considered as a continuous variable. For the descriptive statistics, this variable was categorized into 1= ≤2, 2= 3-4, and 3= ≥5.<br><br>This was done after checking for the linearity assumption with the log-odds of short birth interval, which is a binary response variable. Multicollinearity was also checked among the exposure variables using the variance inflation factor (VIF). When the values of VIF were lower than 10, then the collinearity problem was considered unlikely. The VIF for birth order was 18.15 and for the total number of children born before the index child was 16.26, which indicates the presence of collinearity. Therefore, we removed the variable birth order from the model and the VIF became less than 3 for each variable included in the model. |
|                                                                | Birth order                                          | Birth order is the order number of the births from first to last. Twins are given the same birth order, but the birth order of a child born after twins will be the total number of births preceding plus one.                                                                                                                                                                                                                                                                                                                                                                                                                                                                                                                                                                                                                                             |
|                                                                | Diarrhoeal Disease                                   | 1= Yes, 2=No                                                                                                                                                                                                                                                                                                                                                                                                                                                                                                                                                                                                                                                                                                                                                                                                                                               |
|                                                                | Fever                                                | 1=Yes, 2=No                                                                                                                                                                                                                                                                                                                                                                                                                                                                                                                                                                                                                                                                                                                                                                                                                                                |
| Respiratory infection                                          | 1=Yes, 2=No                                          |                                                                                                                                                                                                                                                                                                                                                                                                                                                                                                                                                                                                                                                                                                                                                                                                                                                            |

|                              |                  |                                                                                                                                                                                                         |
|------------------------------|------------------|---------------------------------------------------------------------------------------------------------------------------------------------------------------------------------------------------------|
| <b>Environmental factors</b> | Source of water  | 1= Piped water, 2= Other improved (protected spring and well, and rain water), 3= Unimproved (river, pond, unprotected spring and well).                                                                |
|                              | Latrine facility | 1 = Improved (access to flush toilet, ventilated improved pit latrine, traditional pit latrine with a slab, or composting toilet and does not share this facility with other households), 2=unimproved. |

For peer review only

## Supplemental Material II

**Table 2** Standardized difference before and after weighting the propensity score

| Variable                                                 | Standardized difference |                 |
|----------------------------------------------------------|-------------------------|-----------------|
|                                                          | Before weighting        | After weighting |
| Maternal age at the birth of the index child (in years)* | -0.392                  | 0.022           |
| Maternal education                                       |                         |                 |
| Uneducated                                               | 0.178                   | 0.009           |
| Primary                                                  | -0.112                  | -0.017          |
| Maternal occupation                                      |                         |                 |
| Not employed                                             | 0.128                   | 0.005           |
| Husband education                                        |                         |                 |
| Uneducated                                               | 0.148                   | 0.012           |
| Primary                                                  | -0.041                  | 0.003           |
| Husband occupation                                       |                         |                 |
| Not employed                                             | 0.159                   | 0.006           |
| Wealth                                                   |                         |                 |
| Poorest                                                  | 0.332                   | -0.004          |
| Poorer                                                   | -0.002                  | 0.008           |
| Middle                                                   | -0.070                  | 0.005           |
| Richer                                                   | -0.061                  | -0.007          |
| Total number of preceding child*                         | 0.207                   | -0.006          |
| Survival status of preceding child                       |                         |                 |
| Yes                                                      | -0.029                  | -0.004          |
| Residence                                                |                         |                 |
| Urban                                                    | -0.239                  | -0.006          |
| Region                                                   |                         |                 |
| Tigray                                                   | -0.207                  | 0.004           |
| Afar                                                     | 0.186                   | 0.008           |
| Amhara                                                   | -0.282                  | 0.014           |
| Oromia                                                   | -0.006                  | 0.003           |
| Somali                                                   | 0.402                   | -0.003          |
| Benishangul-Gumuz                                        | 0.061                   | -0.006          |
| SNNPR**                                                  | -0.069                  | -0.005          |
| Gambella,                                                | -0.087                  | -0.009          |
| Harari                                                   | -0.001                  | -0.009          |
| Addis Ababa                                              | -0.180                  | 0.014           |
| Access to mass media                                     |                         |                 |
| Yes                                                      | -0.201                  | -0.002          |
| Decision making autonomy                                 |                         |                 |
| No                                                       | 0.067                   | -0.009          |

1  
2  
3 \*Maternal age at the birth of the index child (in years) and total number of the preceding  
4 child were considered as continuous variables; \*\*SNNPR= Southern Nations, Nationalities,  
5 and Peoples' Region  
6  
7  
8  
9  
10  
11  
12  
13  
14  
15  
16  
17  
18  
19  
20  
21  
22  
23  
24  
25  
26  
27  
28  
29  
30  
31  
32  
33  
34  
35  
36  
37  
38  
39  
40  
41  
42  
43  
44  
45  
46  
47  
48  
49  
50  
51  
52  
53  
54  
55  
56  
57  
58  
59  
60

For peer review only

## STROBE 2007 (v4) Statement—Checklist of items for the study

| Section/Topic                | Item # | Recommendation                                                                                                                                                                       | Reported on page # |
|------------------------------|--------|--------------------------------------------------------------------------------------------------------------------------------------------------------------------------------------|--------------------|
| Title and abstract           | 1      | (a) Indicate the study's design with a commonly used term in the title or the abstract                                                                                               | 2                  |
|                              |        | (b) Provide in the abstract an informative and balanced summary of what was done and what was found                                                                                  | 2                  |
| <b>Introduction</b>          |        |                                                                                                                                                                                      |                    |
| Background/rationale         | 2      | Explain the scientific background and rationale for the investigation being reported                                                                                                 | 3, 4, 5, & 6       |
| Objectives                   | 3      | State specific objectives, including any prespecified hypotheses                                                                                                                     | 6                  |
| <b>Methods</b>               |        |                                                                                                                                                                                      |                    |
| Study design                 | 4      | Present key elements of study design early in the paper                                                                                                                              | 6                  |
| Setting                      | 5      | Describe the setting, locations, and relevant dates, including periods of recruitment, exposure, follow-up, and data collection                                                      | 6                  |
| Participants                 | 6      | (a) Give the eligibility criteria, and the sources and methods of selection of participants                                                                                          | 6                  |
| Variables                    | 7      | Clearly define all outcomes, exposures, predictors, potential confounders, and effect modifiers. Give diagnostic criteria, if applicable                                             | 6, 7, & 8          |
| Data sources/<br>measurement | 8*     | For each variable of interest, give sources of data and details of methods of assessment (measurement). Describe comparability of assessment methods if there is more than one group | 6, 7, & 8          |
| Bias                         | 9      | Describe any efforts to address potential sources of bias                                                                                                                            | 8, 9, & 10         |
| Study size                   | 10     | Explain how the study size was arrived at                                                                                                                                            | 6                  |
| Quantitative variables       | 11     | Explain how quantitative variables were handled in the analyses. If applicable, describe which groupings were chosen and why                                                         | 6, 7, & 8          |
| Statistical methods          | 12     | (a) Describe all statistical methods, including those used to control for confounding                                                                                                | 8, 9, 10, & 11     |
|                              |        | (b) Describe any methods used to examine subgroups and interactions                                                                                                                  | 8, 9, 10, & 11     |
|                              |        | (c) Explain how missing data were addressed                                                                                                                                          | N/A                |
|                              |        | (d) If applicable, describe analytical methods taking account of sampling strategy                                                                                                   | 8, 9, 10, & 11     |
|                              |        | (e) Describe any sensitivity analyses                                                                                                                                                | 8, 9, 10, & 11     |



|                          |     |                                                                                                                                                                                                              |                    |
|--------------------------|-----|--------------------------------------------------------------------------------------------------------------------------------------------------------------------------------------------------------------|--------------------|
| <b>Results</b>           |     |                                                                                                                                                                                                              |                    |
| Participants             | 13* | (a) Report numbers of individuals at each stage of study—eg numbers potentially eligible, examined for eligibility, confirmed eligible, included in the study, completing follow-up, and analysed            | 11, 12, & 13       |
|                          |     | (b) Give reasons for non-participation at each stage                                                                                                                                                         | N/A                |
|                          |     | (c) Consider use of a flow diagram                                                                                                                                                                           | N/A                |
| Descriptive data         | 14* | (a) Give characteristics of study participants (eg demographic, clinical, social) and information on exposures and potential confounders                                                                     | 11, 12, & 13       |
|                          |     | (b) Indicate number of participants with missing data for each variable of interest                                                                                                                          | N/A                |
| Outcome data             | 15* | Report numbers of outcome events or summary measures                                                                                                                                                         | 9 and 11, 12, & 13 |
| Main results             | 16  | (a) Give unadjusted estimates and, if applicable, confounder-adjusted estimates and their precision (eg, 95% confidence interval). Make clear which confounders were adjusted for and why they were included | 15                 |
|                          |     | (b) Report category boundaries when continuous variables were categorized                                                                                                                                    | N/A                |
|                          |     | (c) If relevant, consider translating estimates of relative risk into absolute risk for a meaningful time period                                                                                             | N/A                |
| Other analyses           | 17  | Report other analyses done—eg analyses of subgroups and interactions, and sensitivity analyses                                                                                                               | 14                 |
| <b>Discussion</b>        |     |                                                                                                                                                                                                              |                    |
| Key results              | 18  | Summarise key results with reference to study objectives                                                                                                                                                     | 15 & 16            |
| Limitations              | 19  | Discuss limitations of the study, taking into account sources of potential bias or imprecision. Discuss both direction and magnitude of any potential bias                                                   | 17 & 18            |
| Interpretation           | 20  | Give a cautious overall interpretation of results considering objectives, limitations, multiplicity of analyses, results from similar studies, and other relevant evidence                                   | 15, 16, 17, & 18   |
| Generalisability         | 21  | Discuss the generalisability (external validity) of the study results                                                                                                                                        | 15, 16, 17, & 18   |
| <b>Other information</b> |     |                                                                                                                                                                                                              |                    |
| Funding                  | 22  | Give the source of funding and the role of the funders for the present study and, if applicable, for the original study on which the present article is based                                                | 19                 |

\*Give information separately for cases and controls in case-control studies and, if applicable, for exposed and unexposed groups in cohort and cross-sectional studies.

**Note:** An Explanation and Elaboration article discusses each checklist item and gives methodological background and published examples of transparent reporting. The STROBE checklist is best used in conjunction with this article (freely available on the Web sites of PLoS Medicine at <http://www.plosmedicine.org/>, Annals of Internal Medicine at <http://www.annals.org/>, and Epidemiology at <http://www.epidem.com/>). Information on the STROBE Initiative is available at [www.strobe-statement.org](http://www.strobe-statement.org).
