# Supplementary material for: Effects of short birth interval on neonatal, infant and under-five child mortality in Ethiopia: a nationally representative observational study using inverse probability of treatment weighting
Source: PubMed Central journal article supplement — BMJ Open. 2021 Aug 18;11(8):e047892. doi: 10.1136/bmjopen-2020-047892 (PMC8375759; doi:10.1136/bmjopen-2020-047892), 2021-08-18
Supplement: bmjopen-2020-047892supp001.pdf [file bmjopen-2020-047892supp001.pdf]

## Supplemental Material I

**Table 1** Variables included in Direct Acyclic Graph

| Category                                   | Variables                                           | Definition                                                                                                                                                                                                                                                                                                                                                                                                                                    |
|--------------------------------------------|-----------------------------------------------------|-----------------------------------------------------------------------------------------------------------------------------------------------------------------------------------------------------------------------------------------------------------------------------------------------------------------------------------------------------------------------------------------------------------------------------------------------|
| <b>Maternal background characteristics</b> | Maternal age at birth of the index child (in years) | Maternal age at birth of the index child, which was considered as a continuous variable. It was also categorized the descriptive section of the results (1= $\leq 19$ , 2= 20-24, 3=25-29, 4=30-34, and 5= $\geq 35$ ).                                                                                                                                                                                                                       |
|                                            | Educational level                                   | Maximum educational level (1= Uneducated, 2=Primary and 3=Secondary+)                                                                                                                                                                                                                                                                                                                                                                         |
|                                            | Employment status                                   | Maternal employment status (1=Not Employed; 2=Employed))                                                                                                                                                                                                                                                                                                                                                                                      |
|                                            | Place of residence                                  | Place of residence (1=Urban; 2=Rural)                                                                                                                                                                                                                                                                                                                                                                                                         |
|                                            | Region                                              | Region of residence (1=Tigray, 2=Afar, 3=Amhara, 4=Oromia, 5=Somali, 6=Benishangul-Gumuz, 7=SNNPR*, 8=Gambella, 9=Harari, 10=Addis Ababa, 11=Dire Dawa)<br>*SNNPR= Southern Nations, Nationalities, and Peoples' Region                                                                                                                                                                                                                       |
|                                            | Decision making autonomy                            | Coded as 'yes' if the women were involved in all decisions regarding their own health care, major household purchases and visits to her family or relatives (1=Yes, 2=No).                                                                                                                                                                                                                                                                    |
| <b>Husband background characteristics</b>  | Husband's education                                 | Maximum educational level of the husband (1= Uneducated, 2= Primary, 3= Secondary+)                                                                                                                                                                                                                                                                                                                                                           |
|                                            | Husband's occupation                                | 1= Not employed, 2=Employed                                                                                                                                                                                                                                                                                                                                                                                                                   |
| <b>Household characteristics</b>           | Access to media                                     | 1=Access to media, 2= Have no access to media                                                                                                                                                                                                                                                                                                                                                                                                 |
|                                            | Wealth index                                        | The wealth index provided with the dataset was used. DHS program provides a composite index of household amenities based on the principal component analysis (PCA) and classified the population into quintiles: (1st quintile (Poorest); 2nd quintile; 3rd quintile; 4th quintile and 5th quintile (Richest). A quintile is used as a measure of its relative socioeconomic level (i.e., 1=Poorest; 2=Poorer; 3=Middle; 4=Richer; 5=Richest) |

|                                                                |                                                      |                                                                                                                                                                                                                                                                                                                                                                                                                                                                                                                                                                                                                                                                                                                                                                                                                                                                    |
|----------------------------------------------------------------|------------------------------------------------------|--------------------------------------------------------------------------------------------------------------------------------------------------------------------------------------------------------------------------------------------------------------------------------------------------------------------------------------------------------------------------------------------------------------------------------------------------------------------------------------------------------------------------------------------------------------------------------------------------------------------------------------------------------------------------------------------------------------------------------------------------------------------------------------------------------------------------------------------------------------------|
| <b>Maternal health status and healthcare-related variables</b> | Antenatal care                                       | Women's antenatal care utilization categorized as 1=No visit, 2=At least one visit, 3= $\geq$ Four visits                                                                                                                                                                                                                                                                                                                                                                                                                                                                                                                                                                                                                                                                                                                                                          |
|                                                                | Place of delivery                                    | 1= Health facilities, 2=Home                                                                                                                                                                                                                                                                                                                                                                                                                                                                                                                                                                                                                                                                                                                                                                                                                                       |
|                                                                | Postnatal care                                       | Women received check-up at least once within 48 hours after delivery by a skilled provider; categorized as 1=Yes, 2=No                                                                                                                                                                                                                                                                                                                                                                                                                                                                                                                                                                                                                                                                                                                                             |
|                                                                | TT vaccination                                       | Women received at least two doses of the immunization during pregnancy (1=Yes, 2=No)                                                                                                                                                                                                                                                                                                                                                                                                                                                                                                                                                                                                                                                                                                                                                                               |
| <b>Neonatal, infant and child characteristics</b>              | Sex                                                  | Child sex (1=Male, 2=Female)                                                                                                                                                                                                                                                                                                                                                                                                                                                                                                                                                                                                                                                                                                                                                                                                                                       |
|                                                                | Multiple pregnancy                                   | 1=Yes, 2=No                                                                                                                                                                                                                                                                                                                                                                                                                                                                                                                                                                                                                                                                                                                                                                                                                                                        |
|                                                                | Birth weight                                         | 1=Below average, 2=Average, 3=Above average                                                                                                                                                                                                                                                                                                                                                                                                                                                                                                                                                                                                                                                                                                                                                                                                                        |
|                                                                | Mode of delivery                                     | 1= Caesarean section, 2= Non caesarean section                                                                                                                                                                                                                                                                                                                                                                                                                                                                                                                                                                                                                                                                                                                                                                                                                     |
|                                                                | Survival status of the preceding child               | 1= Yes, 2=No                                                                                                                                                                                                                                                                                                                                                                                                                                                                                                                                                                                                                                                                                                                                                                                                                                                       |
|                                                                | Total number of children born before the index child | Total number of children born before the index child was considered as a continuous variable. For the descriptive statistics, this variable was categorized into 1= $\leq$ 2, 2= 3-4, and 3= $\geq$ 5.<br>This was done after checking for the linearity assumption with the log-odds of short birth interval, which is a binary response variable. Multicollinearity was also checked among the exposure variables using the variance inflation factor (VIF). When the values of VIF were lower than 10, then the collinearity problem was considered unlikely. The VIF for birth order was 18.15 and for the total number of children born before the index child was 16.26, which indicates the presence of collinearity. Therefore, we removed the variable birth order from the model and the VIF became less than 3 for each variable included in the model. |
|                                                                | Birth order                                          | Birth order is the order number of the births from first to last. Twins are given the same birth order, but the birth order of a child born after twins will be the total number of births preceding plus one.                                                                                                                                                                                                                                                                                                                                                                                                                                                                                                                                                                                                                                                     |
|                                                                | Diarrhoeal Disease                                   | 1= Yes, 2=No                                                                                                                                                                                                                                                                                                                                                                                                                                                                                                                                                                                                                                                                                                                                                                                                                                                       |
|                                                                | Fever                                                | 1=Yes, 2=No                                                                                                                                                                                                                                                                                                                                                                                                                                                                                                                                                                                                                                                                                                                                                                                                                                                        |
| Respiratory infection                                          | 1=Yes, 2=No                                          |                                                                                                                                                                                                                                                                                                                                                                                                                                                                                                                                                                                                                                                                                                                                                                                                                                                                    |

|                              |                  |                                                                                                                                                                                                         |
|------------------------------|------------------|---------------------------------------------------------------------------------------------------------------------------------------------------------------------------------------------------------|
| <b>Environmental factors</b> | Source of water  | 1= Piped water, 2= Other improved (protected spring and well, and rain water), 3= Unimproved (river, pond, unprotected spring and well).                                                                |
|                              | Latrine facility | 1 = Improved (access to flush toilet, ventilated improved pit latrine, traditional pit latrine with a slab, or composting toilet and does not share this facility with other households), 2=unimproved. |
