# Supplementary material for: Effects of short birth interval on neonatal, infant and under-five child mortality in Ethiopia: a nationally representative observational study using inverse probability of treatment weighting
Source: PubMed Central journal article supplement — BMJ Open. 2021 Aug 18;11(8):e047892. doi: 10.1136/bmjopen-2020-047892 (PMC8375759; doi:10.1136/bmjopen-2020-047892), 2021-08-18
Supplement: bmjopen-2020-047892supp002.pdf [file bmjopen-2020-047892supp002.pdf]

## Supplemental Material II

**Table 2** Standardized difference before and after weighting the propensity score

| Variable                                                 | Standardized difference |                 |
|----------------------------------------------------------|-------------------------|-----------------|
|                                                          | Before weighting        | After weighting |
| Maternal age at the birth of the index child (in years)* | -0.392                  | 0.022           |
| Maternal education                                       |                         |                 |
| Uneducated                                               | 0.178                   | 0.009           |
| Primary                                                  | -0.112                  | -0.017          |
| Maternal occupation                                      |                         |                 |
| Not employed                                             | 0.128                   | 0.005           |
| Husband education                                        |                         |                 |
| Uneducated                                               | 0.148                   | 0.012           |
| Primary                                                  | -0.041                  | 0.003           |
| Husband occupation                                       |                         |                 |
| Not employed                                             | 0.159                   | 0.006           |
| Wealth                                                   |                         |                 |
| Poorest                                                  | 0.332                   | -0.004          |
| Poorer                                                   | -0.002                  | 0.008           |
| Middle                                                   | -0.070                  | 0.005           |
| Richer                                                   | -0.061                  | -0.007          |
| Total number of preceding child*                         | 0.207                   | -0.006          |
| Survival status of preceding child                       |                         |                 |
| Yes                                                      | -0.029                  | -0.004          |
| Residence                                                |                         |                 |
| Urban                                                    | -0.239                  | -0.006          |
| Region                                                   |                         |                 |
| Tigray                                                   | -0.207                  | 0.004           |
| Afar                                                     | 0.186                   | 0.008           |
| Amhara                                                   | -0.282                  | 0.014           |
| Oromia                                                   | -0.006                  | 0.003           |
| Somali                                                   | 0.402                   | -0.003          |
| Benishangul-Gumuz                                        | 0.061                   | -0.006          |
| SNNPR**                                                  | -0.069                  | -0.005          |
| Gambella,                                                | -0.087                  | -0.009          |
| Harari                                                   | -0.001                  | -0.009          |
| Addis Ababa                                              | -0.180                  | 0.014           |
| Access to mass media                                     |                         |                 |
| Yes                                                      | -0.201                  | -0.002          |
| Decision making autonomy                                 |                         |                 |
| No                                                       | 0.067                   | -0.009          |

\*Maternal age at the birth of the index child (in years) and total number of the preceding child were considered as continuous variables; \*\*SNNPR= Southern Nations, Nationalities, and Peoples' Region
